# Supplementary material for: Genome mining for fungal polyketide-diterpenoid hybrids: discovery of key terpene cyclases and multifunctional P450s for structural diversification
Source: Royal Society of Chemistry journal article supplement (doi:10.1039/c8qo01124a), 2018-11-29
Supplement: c8qo01124a1.pdf [file c8qo01124a1.pdf]

*Supporting Information for*

**Genome Mining for Fungal Polyketide-Diterpenoid Hybrids: Discovery of Key Terpene Cyclases and Multifunctional P450s for Structural Diversification**

Wei-Guang Wang,<sup>\*,a</sup> Lian-Qiong Du,<sup>a</sup> Shan-Ling Sheng,<sup>a</sup> Ao Li,<sup>b</sup> Yan-Ping Li,<sup>c</sup> Gui-Guang Cheng,<sup>d</sup> Gan-Peng Li,<sup>a</sup> Guiling Sun,<sup>e</sup> Qiu-Fen Hu,<sup>a</sup> and Yudai Matsuda<sup>\*,f</sup>

<sup>a</sup>Key Laboratory of Chemistry in Ethnic Medicinal Resources, State Ethnic Affairs Commission and Ministry of Education, Yunnan Minzu University, Kunming 650031, China. \*E-mail: wwg@live.cn (W.-G. Wang)

<sup>b</sup>College of Pharmacy and Bioengineering, Chongqing University of Technology, Chongqing 400054, China.

<sup>c</sup>School of Chinese Pharmacy, Yunnan University of Traditional Chinese Medicine, Kunming 650500, China.

<sup>d</sup>Yunnan Institute of Food Safety, Kunming University of Science and Technology, Kunming, 650500, China.

<sup>e</sup>Key laboratory of Plant Stress Biology, State Key Laboratory of Cotton Biology, School of Life Sciences, Henan University, Kaifeng 475004, China.

<sup>f</sup>Department of Chemistry, City University of Hong Kong, 83 Tat Chee Avenue, Kowloon, Hong Kong SAR, China.

\*E-mail: ymatsuda@cityu.edu.hk (Y. Matsuda)

**Table of Contents**

|                                     |         |
|-------------------------------------|---------|
| <b>Supplementary Methods</b>        | S2-S4   |
| <b>Supplementary Tables S1-S14</b>  | S5-S18  |
| <b>Supplementary Figures S1-S62</b> | S46-S50 |

## Supplementary Methods

### Isolation and Purification of Each Metabolite

#### Purification conditions for chevalone E (**1**):

The extract from *A. oryzae* NSAR1 with *cle1*, *cle3*, *cle5*, *cle6*, and *cle7* was subjected to silica-gel column chromatography and eluted stepwise using a chloroform:methanol gradient (100:0 to 90:10). Fractions that contained **1** were further purified by reverse-phase preparative HPLC (55% aqueous acetonitrile, 3.0 mL/min) to yield 10.0 mg of a white solid:  $[\alpha]^{25}_D$  -81.1 (*c* 0.1, CH<sub>3</sub>OH); for UV spectrum see Figure S1; for <sup>1</sup>H and <sup>13</sup>C NMR data see Table S4 and Figures S3-S8; HRMS found *m/z* 415.2852 [M + H]<sup>+</sup> (calcd 415.2852 for C<sub>26</sub>H<sub>39</sub>O<sub>4</sub>).

#### Purification conditions for 20-hydroxychevalone E (**2**):

The extract from *A. oryzae* NSAR1 with *cle1*, *cle2*, *cle3*, *cle5*, *cle6*, and *cle7* was subjected to silica-gel column chromatography and eluted stepwise using a chloroform:methanol gradient (100:0 to 90:10). Fractions that contained **2** were further purified by reverse-phase preparative HPLC (35% aqueous acetonitrile, 3.0 mL/min) to yield 15.0 mg of a white solid:  $[\alpha]^{25}_D$  -110.6 (*c* 0.1, CH<sub>3</sub>OH); for UV spectrum see Figure S1; for <sup>1</sup>H and <sup>13</sup>C NMR data see Table S5 and Figures S9-S14; HRMS found *m/z* 431.2801 [M + H]<sup>+</sup> (calcd 431.2792 for C<sub>26</sub>H<sub>39</sub>O<sub>5</sub>).

#### Purification conditions for 20-carboxychevalone E (**3**):

The extract from *A. oryzae* NSAR1 with *cle1*, *cle2*, *cle3*, *cle5*, *cle6*, and *cle7* was subjected to silica-gel column chromatography and eluted stepwise using a chloroform:methanol gradient (100:0 to 90:10). Fractions that contained **3** were further purified by reverse-phase preparative HPLC (35% aqueous acetonitrile, 3.0 mL/min) to yield 14.0 mg of a white solid:  $[\alpha]^{25}_D$  -87.0 (*c* 0.1, CH<sub>3</sub>OH); for UV spectrum see Figure S1; for <sup>1</sup>H and <sup>13</sup>C NMR data see Table S6 and Figures S15-S20; HRMS found *m/z* 445.2593 [M + H]<sup>+</sup> (calcd 445.2585 for C<sub>26</sub>H<sub>37</sub>O<sub>6</sub>).

#### Purification conditions for 11-hydroxychevalone E (**4**):

The extract from *A. oryzae* NSAR1 with *cle1*, *cle2*, *cle3*, *cle4*, *cle5*, *cle6*, and *cle7* was subjected to silica-gel column chromatography and eluted stepwise using a chloroform:methanol gradient (100:0 to 90:10). Fractions that contained **4** were further purified by reverse-phase preparative HPLC (35% aqueous acetonitrile, 3.0 mL/min) to yield 2.0 mg of a white solid:  $[\alpha]^{25}_D$  -87.5 (*c* 0.1, CH<sub>3</sub>OH); for UV spectrum see Figure S1; for <sup>1</sup>H and <sup>13</sup>C NMR data see Table S7 and Figures S21-S26; HRMS found *m/z* 431.2798 [M + H]<sup>+</sup> (calcd 431.2792 for C<sub>26</sub>H<sub>39</sub>O<sub>5</sub>).

#### Purification conditions for 11,12-dihydroxychevalone E (**5**):

The extract from *A. oryzae* NSAR1 with *cle1*, *cle3*, *cle4*, *cle5*, *cle6*, and *cle7* was subjected to silica-gel column chromatography and eluted stepwise using a chloroform:methanol gradient (100:0 to 90:10). Fractions that contained **5** were further purified by reverse-phase preparative HPLC (40% aqueous acetonitrile, 3.0 mL/min) to yield 14.0 mg of a white solid:  $[\alpha]^{25}_D$  -102.2 (*c* 0.05, CH<sub>3</sub>OH); for UV spectrum see Figure S1; for <sup>1</sup>H and <sup>13</sup>C NMR data see Table S8 and Figures S27-S32; HRMS found *m/z* 447.2752 [M + H]<sup>+</sup> (calcd 447.2741 for C<sub>26</sub>H<sub>39</sub>O<sub>6</sub>).

**Purification conditions for 11,20-dihydroxychevalone E (6):**

The extract from *A. oryzae* NSAR1 with *cle1*, *cle2*, *cle3*, *cle4*, *cle5*, *cle6*, and *cle7* was subjected to silica-gel column chromatography and eluted stepwise using a chloroform:methanol gradient (100:0 to 90:10). Fractions that contained **6** were further purified by reverse-phase preparative HPLC (20% aqueous acetonitrile, 3.0 mL/min) to yield 5.0 mg of a white solid:  $[\alpha]^{25}_D$  -65.2 (*c* 0.05, CH<sub>3</sub>OH); for UV spectrum see Figure S1; for <sup>1</sup>H and <sup>13</sup>C NMR data see Table S9 and Figures S33-S38; HRMS found *m/z* 447.2749 [M + H]<sup>+</sup> (calcd 447.2741 for C<sub>26</sub>H<sub>39</sub>O<sub>6</sub>).

**Purification conditions for 20,11-olide-chevalone E (7):**

The extract from *A. oryzae* NSAR1 with *cle1*, *cle2*, *cle3*, *cle4*, *cle5*, *cle6*, and *cle7* was subjected to silica-gel column chromatography and eluted stepwise using a chloroform:methanol gradient (100:0 to 90:10). Fractions that contained **7** were further purified by reverse-phase preparative HPLC (30% aqueous acetonitrile, 3.0 mL/min) to yield 6.0 mg of a white solid:  $[\alpha]^{25}_D$  -86.0 (*c* 0.1, CH<sub>3</sub>OH); for UV spectrum see Figure S1; for <sup>1</sup>H and <sup>13</sup>C NMR data see Table S10 and Figures S39-S44; HRMS found *m/z* 443.2431 [M + H]<sup>+</sup> (calcd 443.2428 for C<sub>26</sub>H<sub>35</sub>O<sub>6</sub>).

**Purification conditions for 12-hydroxy-20,11-olide-chevalone E (8):**

The extract from *A. oryzae* NSAR1 with *cle1*, *cle2*, *cle3*, *cle4*, *cle5*, *cle6*, and *cle7* was subjected to silica-gel column chromatography and eluted stepwise using a chloroform:methanol gradient (100:0 to 90:10). Fractions that contained **8** were further purified by reverse-phase preparative HPLC (20% aqueous acetonitrile, 3.0 mL/min) to yield 6.0 mg of a white solid:  $[\alpha]^{25}_D$  -88.0 (*c* 0.1, CH<sub>3</sub>OH); for UV spectrum see Figure S1; for <sup>1</sup>H and <sup>13</sup>C NMR data see Table S11 and Figures S45-S50; HRMS found *m/z* 459.2368 [M + H]<sup>+</sup> (calcd 459.2383 for C<sub>26</sub>H<sub>35</sub>O<sub>7</sub>).

**Purification conditions for geranylgeranyl-triacetate lactone (9):**

The extract from *A. oryzae* NSAR1 with *cle1*, *cle5*, and *cle6* was subjected to silica-gel column chromatography and eluted stepwise using a chloroform:methanol gradient (100:0 to 90:10). Fractions that contained **9** were further purified by reverse-phase preparative HPLC (80% aqueous acetonitrile, 3.0 mL/min) to yield 100.0 mg of a white solid: for UV spectrum see Figure S1; for <sup>1</sup>H and <sup>13</sup>C NMR data see Table S12 and Figures S51-S55; HRMS found *m/z* 421.2715 [M + Na]<sup>+</sup> (calcd 421.2713 for C<sub>26</sub>H<sub>38</sub>O<sub>3</sub>Na).

**Purification conditions for dihydroxygeranylgeranyl-triacetate lactone (10):**

The extract from *A. oryzae* NSAR1 with *cle1*, *cle3*, *cle5*, and *cle6* was subjected to silica-gel column chromatography and eluted stepwise using a chloroform:methanol gradient (100:0 to 90:10). Fractions that contained **10** were further purified by reverse-phase preparative HPLC (45% aqueous acetonitrile, 3.0 mL/min) to yield 20.0 mg of a white solid:  $[\alpha]^{25}_D$  -76.0 (*c* 0.1, CH<sub>3</sub>OH); for UV spectrum see Figure S1; for <sup>1</sup>H and <sup>13</sup>C NMR data see Table S13 and Figures S56-S60; HRMS found *m/z* 455.2779 [M + Na]<sup>+</sup> (calcd 455.2768 for C<sub>26</sub>H<sub>40</sub>O<sub>5</sub>Na).

**Purification conditions for sartorypyrone D (11):**

The extract from *A. oryzae* NSAR1 with *cle1*, *cle3*, *cle5*, *cle6*, and *sre3* was subjected to silica-gel column

chromatography and eluted stepwise using a chloroform:methanol gradient (100:0 to 90:10). Fractions that contained **11** were further purified by reverse-phase preparative HPLC (40% aqueous acetonitrile, 3.0 mL/min) to yield 3.0 mg of a white solid:  $[\alpha]^{25}_{\text{D}} -18.0$  (*c* 0.5, CH<sub>3</sub>OH); for UV spectrum see Figure S1; for <sup>1</sup>H and <sup>13</sup>C NMR data see Figures S61 and S62; HRMS found *m/z* 415.2826 [M + H]<sup>+</sup> (calcd 415.2843 for C<sub>26</sub>H<sub>39</sub>O<sub>4</sub>).

Table S1. Annotation of each protein encoded by the *cle* and *sre* cluster.

The *cle* cluster from *Aspergillus versicolor* 0312 and *sre* cluster from *Aspergillus felis* 0260

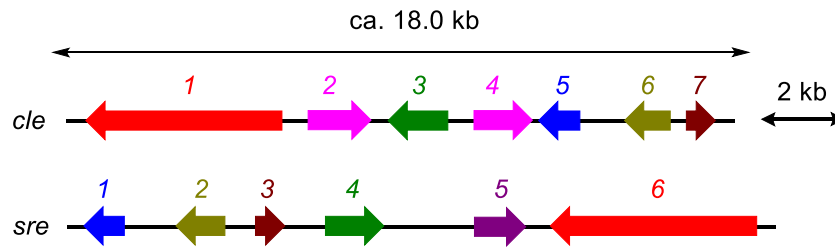

| Gene        | Amino acids (base pairs) | Protein homologue, origin            | Similarity/identity (%) | Proposed function                     |
|-------------|--------------------------|--------------------------------------|-------------------------|---------------------------------------|
| <i>cle1</i> | 1807 (5488)              | MPAS, <i>Cladonia uncialis</i>       | 50/33                   | polyketide synthase                   |
| <i>cle2</i> | 544 (1824)               | PrhD, <i>Penicillium brasilianum</i> | 61/41                   | cytochrome P450 monooxygenase         |
| <i>cle3</i> | 491 (1636)               | AtmM, <i>Aspergillus flavus</i>      | 66/50                   | FAD-dependent monooxygenase           |
| <i>cle4</i> | 496 (1711)               | RoqO, <i>Penicillium rubens</i>      | 61/41                   | cytochrome P450 monooxygenase         |
| <i>cle5</i> | 321 (1090)               | Pyr6, <i>Aspergillus fumigatus</i>   | 64/47                   | UbiA-like prenyltransferase           |
| <i>cle6</i> | 380 (1323)               | AtmG, <i>Aspergillus flavus</i>      | 69/56                   | geranylgeranyl pyrophosphate synthase |
| <i>cle7</i> | 242 (783)                | AtmB, <i>Aspergillus flavus</i>      | 58/36                   | terpene cyclase                       |
| <i>sre1</i> | 342 (1134)               | Pyr6, <i>Aspergillus fumigatus</i>   | 63/46                   | UbiA-like prenyltransferase           |
| <i>sre2</i> | 364 (1257)               | AtmG, <i>Aspergillus flavus</i>      | 79/64                   | geranylgeranyl pyrophosphate synthase |
| <i>sre3</i> | 239 (804)                | AtmB, <i>Aspergillus flavus</i>      | 56/38                   | terpene cyclase                       |
| <i>sre4</i> | 476 (1612)               | AtmM, <i>Aspergillus flavus</i>      | 65/50                   | FAD-dependent monooxygenase           |
| <i>sre5</i> | 434 (1361)               | Pyr8, <i>Aspergillus fumigatus</i>   | 53/38                   | acetyltransferase                     |
| <i>sre6</i> | 1840 (5584)              | MPAS, <i>Cladonia uncialis</i>       | 53/36                   | polyketide synthase                   |

Table S2. Primers used in this study

| Primer Sequence   | (5' to 3')                                 |
|-------------------|--------------------------------------------|
| 0312-19-1F        | agcaagctccgaattATGTCCTCCTCAATCCCTTCT       |
| 0312-19-1R        | taccgagctcgaattCTAGACAGCCCCGTTATATATAT     |
| 0312-19-2F        | agcaagctccgaattATGCTGCAAACCCAACCTCCA       |
| 0312-19-2R        | taccgagctcgaattTTACACAGTAGCCATTGGACAAG     |
| 0312-19-3F        | agcaagctccgaattATGTATAGGGTACGCAGCAT        |
| 0312-19-3R        | taccgagctcgaattTCAGAACGAGGAGAATCTAGC       |
| 0312-19-4F        | agcaagctccgaattATGACAGTATTTGACATTTTCACC    |
| 0312-19-4R        | taccgagctcgaattCTAGAACTCTAGCCCTATATCGT     |
| 0312-19-5F        | agcaagctccgaattATGACATACAAGCAGAGGAAC       |
| 0312-19-5R        | taccgagctcgaattCTAACAGCCATTTCACCAATAA      |
| 0312-19-6F        | agcaagctccgaattATGCACTCTGTCCGTAATTC        |
| 0312-19-6R        | taccgagctcgaattTCACTCCTTCAACTCCAGAAAAT     |
| 0312-19-7F        | agcaagctccgaattATGGAAGAAGGCTGGGACTT        |
| 0312-19-7R        | taccgagctcgaattTTAGGCCACCTTGTCTCTCT        |
| PTA-0260-18-TC.F  | agcaagctccgaattatggacgcatttgaccttTC        |
| PTA-0260-18-TC.R  | taccgagctcgaatttcacgccttctgtactttgg        |
| pUSA-0260-18-TC.R | ACGAGCTACTACAGATCCCCtcacgccttctgtactttgG   |
| Inf-PamyB-F       | TGCCTGCAGGTCGACTCTAGACGACTCCAATCTTCAAGAGC  |
| Inf-TamyB-R       | ATGACTAGTAGATCCTCTAGGTAAGATACATGAGCTTCGGTG |
| Inf-link-F1       | TTGCTCGCGAGCGCGTTCCACTGCATCATCAGTCTAGA     |
| Inf-link-R1       | TGGAACGCGCTCGCGAGCAAGTACCATACAGTACCGCG     |
| Inf-0312-19-3F    | TGAATTTCGAGCTCGGTACCCATGTATAGGGTACGCAGCAT  |
| Inf-0312-19-7R    | ACGAGCTACTACAGATCCCCTTAGGCCACCTTGTCTCTCT   |
| Inf-pPTRI-F       | TGATTACGCCAAGCTTCGACTCCAATCTTCAAGAGC       |
| Inf-pBARI-R       | GCAGGCATGCAAGCTTGTAAGATACATGAGCTTCG        |

Table S3. Plasmids constructed in this study and PCR conditions

| Plasmid                | Vector                             | Insert                  | Primer 1         | Primer 2          | PCR Template        |
|------------------------|------------------------------------|-------------------------|------------------|-------------------|---------------------|
| pTAex3- <i>cle1</i>    | pTAex3 digested with <i>EcoRI</i>  | <i>cle1</i>             | 0312-19-1F       | 0312-19-1R        | gDNA                |
| pTAex3- <i>cle2</i>    | pTAex3 digested with <i>EcoRI</i>  | <i>cle2</i>             | 0312-19-2F       | 0312-19-2R        | gDNA                |
| pTAex3- <i>cle3</i>    | pTAex3 digested with <i>EcoRI</i>  | <i>cle3</i>             | 0312-19-3F       | 0312-19-3R        | gDNA                |
| pTAex3- <i>cle4</i>    | pTAex3 digested with <i>EcoRI</i>  | <i>cle4</i>             | 0312-19-4F       | 0312-19-4R        | gDNA                |
| pTAex3- <i>cle5</i>    | pTAex3 digested with <i>EcoRI</i>  | <i>cle5</i>             | 0312-19-5F       | 0312-19-5R        | gDNA                |
| pTAex3- <i>cle6</i>    | pTAex3 digested with <i>EcoRI</i>  | <i>cle6</i>             | 0312-19-6F       | 0312-19-6R        | gDNA                |
| pTAex3- <i>cle7</i>    | pTAex3 digested with <i>EcoRI</i>  | <i>cle7</i>             | 0312-19-7F       | 0312-19-7R        | gDNA                |
| pTAex3- <i>sre3</i>    | pTAex3 digested with <i>EcoRI</i>  | <i>sre3</i>             | PTA-0260-18-TC.F | PTA-0260-18-TC.R  | gDNA                |
| pBarI- <i>cle2</i>     | pBARI digested with <i>HindIII</i> | <i>PamyB-cle2-TamyB</i> | Inf-pPTRI-F      | Inf-pBARI-R       | pTAex3- <i>cle2</i> |
| pBarI- <i>cle3</i>     | pBARI digested with <i>HindIII</i> | <i>PamyB-cle3-TamyB</i> | Inf-pPTRI-F      | Inf-pBARI-R       | pTAex3- <i>cle3</i> |
| pBarI- <i>cle4</i>     | pBARI digested with <i>HindIII</i> | <i>PamyB-cle4-TamyB</i> | Inf-pPTRI-F      | Inf-pBARI-R       | pTAex3- <i>cle4</i> |
| pBarI- <i>cle2+4</i>   | pBARI digested with <i>HindIII</i> | <i>PamyB-cle2-TamyB</i> | Inf-pPTRI-F      | Inf-link-R1       | pTAex3- <i>cle2</i> |
|                        |                                    | <i>PamyB-cle4-TamyB</i> | Inf-link-F1      | Inf-pBARI-R       | pTAex3- <i>cle4</i> |
| pAdeA- <i>cle5+6</i>   | pAdeA digested with <i>XbaI</i>    | <i>PamyB-cle5-TamyB</i> | Inf-PamyB-F      | Inf-link-R1       | pTAex3- <i>cle5</i> |
|                        |                                    | <i>PamyB-cle6-TamyB</i> | Inf-link-F1      | Inf-TamyB-R       | pTAex3- <i>cle6</i> |
| pUSA- <i>cle3+7</i>    | pUSA digested with <i>SmaI</i>     | <i>cle3-TamyB</i>       | Inf-0312-19-3F   | Inf-link-R1       | pTAex3- <i>cle3</i> |
|                        |                                    | <i>PamyB-cle7</i>       | Inf-link-F1      | Inf-0312-19-7R    | pTAex3- <i>cle7</i> |
| pUSA- <i>cle3+sre3</i> | pUSA digested with <i>SmaI</i>     | <i>cle3-TamyB</i>       | Inf-0312-19-3F   | Inf-link-R1       | pTAex3- <i>cle3</i> |
|                        |                                    | <i>PamyB-sre5</i>       | Inf-link-F1      | pUSA-0260-18-TC.R | pTAex3- <i>sre3</i> |

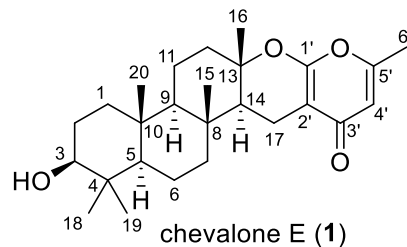

Table S4. NMR data for chevalone E (1) ( $^1\text{H}$  NMR: 800 MHz,  $^{13}\text{C}$  NMR: 200 MHz,  $\delta$  in ppm, recorded in  $\text{CDCl}_3$ )

| position | $^{13}\text{C}$ | $^1\text{H}$   |                                |           |                                  |                                                             |                                                                                            |
|----------|-----------------|----------------|--------------------------------|-----------|----------------------------------|-------------------------------------------------------------|--------------------------------------------------------------------------------------------|
|          | $\delta$ (ppm)  | $\delta$ (ppm) | Multiplicity                   | intensity | HMBC correlation                 | COSY correlation                                            | NOESY correlation                                                                          |
| 1        | 38.2 t          | 0.93 $\alpha$  | overlap                        | 1H        | 2, 3, 5, 9, 10, 20               | H-1 $\beta$ , H-2 $\alpha$                                  | H-1 $\beta$ , H-2 $\alpha$ , H-3 $\alpha$ , H-9 $\alpha$                                   |
|          |                 | 1.68 $\beta$   | overlap                        | 1H        | 2, 3, 5, 9, 10                   | H-1 $\alpha$                                                | H-1 $\alpha$ , H-2 $\beta$ , H-3-20 $\beta$                                                |
| 2        | 27.0 t          | 1.56 $\alpha$  | overlap                        | 1H        | 1, 3, 4, 10                      | H-1 $\alpha$ , H-3 $\alpha$                                 | H-1 $\alpha$ , H-3 $\alpha$                                                                |
|          |                 | 1.61 $\beta$   | overlap                        | 1H        | 1, 3, 4, 10                      | H-3 $\alpha$                                                | H-1 $\beta$ , H-3 $\alpha$                                                                 |
| 3        | 78.4 d          | 3.15 $\alpha$  | d ( $J = 11.1$ Hz)             | 1H        | 1, 2, 4, 5, 18, 19               | H-2 $\alpha$ , H-2 $\beta$                                  | H-1 $\alpha$ , H-2 $\alpha$ , H-5 $\alpha$ , H-3-19 $\alpha$                               |
| 4        | 38.7 s          |                |                                |           |                                  |                                                             |                                                                                            |
| 5        | 55.2 d          | 0.73 $\alpha$  | overlap                        | 1H        | 1, 3, 4, 6, 7, 9, 10, 18, 19, 20 | H-6 $\alpha$ , H-6 $\beta$                                  | H-3 $\alpha$ , H-6 $\alpha$ , H-7 $\alpha$ , H-9 $\alpha$ , H-3-19 $\alpha$                |
| 6        | 17.8 t          | 1.40 $\alpha$  | m                              | 1H        | 4, 5, 7, 8, 10                   | H-5 $\alpha$ , H-6 $\beta$ , H-7 $\alpha$ , H-7 $\beta$     | H-5 $\alpha$ , H-6 $\beta$ , H-7 $\beta$                                                   |
|          |                 | 1.55 $\beta$   | overlap                        | 1H        | 4, 5, 7, 10                      | H-5 $\alpha$ , H-6 $\alpha$ , H-7 $\alpha$ , H-7 $\beta$    | H-6 $\alpha$ , H-7 $\alpha$ , H-3-15 $\beta$                                               |
| 7        | 40.9 t          | 0.98 $\alpha$  | overlap                        | 1H        | 5, 6, 8, 14, 15                  | H-6 $\alpha$ , H-6 $\beta$ , H-7 $\beta$                    | H-5 $\alpha$ , H-6 $\alpha$ , H-7 $\beta$ , H-9 $\alpha$ , H-14 $\alpha$                   |
|          |                 | 1.92 $\beta$   | dd ( $J = 12.8, 2.5$ Hz)       | 1H        | 5, 6, 8, 9, 15                   | H-6 $\alpha$ , H-6 $\beta$ , H-7 $\alpha$                   | H-6 $\alpha$ , H-7 $\alpha$ , H-3-15 $\beta$                                               |
| 8        | 37.0 s          |                |                                |           |                                  |                                                             |                                                                                            |
| 9        | 60.1 d          | 0.88 $\alpha$  | d ( $J = 12.1$ Hz)             | 1H        | 1, 5, 8, 10, 11, 12, 14, 15, 20  | H-11 $\beta$                                                | H-1 $\alpha$ , H-5 $\alpha$ , H-7 $\alpha$ , H-11 $\alpha$ , H-12 $\alpha$ , H-14 $\alpha$ |
| 10       | 37.1 s          |                |                                |           |                                  |                                                             |                                                                                            |
| 11       | 18.5 t          | 1.30 $\beta$   | q ( $J = 13.1$ Hz)             | 1H        | 8, 9, 12, 13                     | H-9 $\alpha$ , H-11 $\alpha$ , H-12 $\alpha$ , H-12 $\beta$ | H-11 $\alpha$ , H-3-15 $\beta$ , H-3-20 $\beta$                                            |
|          |                 | 1.68 $\alpha$  | overlap                        | 1H        | 8, 9, 10, 12, 13                 | H-11 $\beta$ , H-12 $\beta$                                 | H-9 $\alpha$ , H-11 $\beta$ , H-12 $\alpha$                                                |
| 12       | 39.9 t          | 1.64 $\alpha$  | overlap                        | 1H        | 9, 11, 13, 14, 16                | H-11 $\beta$ , H-12 $\beta$                                 | H-9 $\alpha$ , H-11 $\alpha$ , H-14 $\alpha$                                               |
|          |                 | 2.05 $\beta$   | m                              | 1H        | 9, 11, 13, 14, 16                | H-11 $\alpha$ , H-11 $\beta$ , H-12 $\alpha$                | H-11 $\beta$ , H-3-16 $\beta$                                                              |
| 13       | 84.2 s          |                |                                |           |                                  |                                                             |                                                                                            |
| 14       | 52.2 d          | 1.45 $\alpha$  | d ( $J = 12.9$ Hz)             | 1H        | 7, 8, 9, 12, 13, 15, 16, 17, 2'  | H-17 $\alpha$ , H-17 $\beta$                                | H-9 $\alpha$ , H-12 $\alpha$ , H-17 $\alpha$                                               |
| 15       | 15.9 q          | 0.83 $\beta$   | s                              | 3H        | 7, 8, 9, 14                      |                                                             | H-6 $\beta$ , H-7 $\beta$ , H-3-16 $\beta$ , H-17 $\beta$                                  |
| 16       | 20.4 q          | 1.23 $\beta$   | s                              | 3H        | 12, 13, 14                       |                                                             | H-11 $\beta$ , H-12 $\beta$ , H-3-15 $\beta$ , H-17 $\beta$                                |
| 17       | 15.2 t          | 2.09 $\beta$   | dd ( $J = 16.2, 2.7$ Hz)       | 1H        | 8, 13, 14, 1', 2', 3'            | H-14 $\alpha$ , H-17 $\alpha$                               | H-7 $\beta$ , H-3-15 $\beta$ , H-3-16 $\beta$ , H-17 $\alpha$                              |
|          |                 | 2.49 $\alpha$  | ddd ( $J = 16.2, 3.8, 2.7$ Hz) | 1H        | 8, 13, 14, 1', 2', 3'            | H-14 $\alpha$ , H-17 $\beta$                                | H-14 $\alpha$ , H-17 $\beta$                                                               |
| 18       | 15.1 q          | 0.73 $\beta$   | s                              | 3H        | 3, 4, 5, 19                      |                                                             | H-2 $\beta$ , H-6 $\beta$ , H-3-19 $\alpha$                                                |
| 19       | 27.8 q          | 0.92 $\alpha$  | s                              | 3H        | 3, 4, 5, 18                      |                                                             | H-3 $\alpha$ , H-5 $\alpha$ , H-6 $\alpha$ , H-3-18 $\beta$                                |
| 20       | 16.3 q          | 0.79           | s                              | 3H        | 1, 5, 9, 10                      |                                                             | H-1 $\beta$ , H-11 $\beta$                                                                 |
| 1'       | 162.5 s         |                |                                |           |                                  |                                                             |                                                                                            |
| 2'       | 98.4 s          |                |                                |           |                                  |                                                             |                                                                                            |
| 3'       | 180.5 s         |                |                                |           |                                  |                                                             |                                                                                            |
| 4'       | 111.7 d         | 5.94           | s                              | 1H        | 2', 3', 5', 6'                   |                                                             | H-3-6'                                                                                     |
| 5'       | 160.4 s         |                |                                |           |                                  |                                                             |                                                                                            |
| 6'       | 19.1 q          | 2.15           | d ( $J = 1.5$ Hz)              | 3H        | 4', 5'                           |                                                             | H-4'                                                                                       |



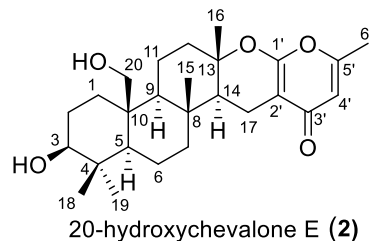

Table S5. NMR data for 20-hydroxychevalone E (**2**) ( $^1\text{H}$  NMR:800 MHz,  $^{13}\text{C}$  NMR: 200 MHz,  $\delta$  in ppm, recorded in methanol- $d_4$ )

| position | $^{13}\text{C}$ | $^1\text{H}$   |                           |           |                                    |                               |                                                                            |
|----------|-----------------|----------------|---------------------------|-----------|------------------------------------|-------------------------------|----------------------------------------------------------------------------|
|          | $\delta$ (ppm)  | $\delta$ (ppm) | Multiplicity              | intensity | HMBC correlation                   | COSY correlation              | NOESY correlation                                                          |
| 1        | 34.1 t          | 0.88 $\alpha$  | td ( $J = 13.4, 3.0$ Hz)  | 1H        | 3, 5, 9, 10, 20                    | H-2 $\beta$                   | H-1 $\beta$ , H-2 $\alpha$ , H-3 $\alpha$ , H-9 $\alpha$                   |
| 2        | 28.0 t          | 2.32 $\beta$   | dt ( $J = 13.4, 3.4$ Hz)  | 1H        | 2, 3, 5, 9, 10, 20                 | H-1 $\alpha$                  | H-1 $\alpha$ , H-2 $\alpha$ , H-2 $\beta$ , H-2-11, H-20b                  |
|          |                 | 1.61 $\alpha$  | m                         | 1H        | 1, 3, 4, 10                        | H-2 $\beta$                   | H-1 $\alpha$ , H-1 $\beta$ , H-3 $\alpha$                                  |
| 3        | 79.5 d          | 1.68 $\beta$   | m                         | 1H        | 1, 3, 4                            | H-1 $\alpha$ , H-3 $\alpha$   | H-1 $\beta$ , H-3 $\alpha$ , H-3-18 $\beta$ , H-20b                        |
|          |                 | 3.17 $\alpha$  | dd ( $J = 11.9, 4.6$ Hz)  | 1H        | 1, 4, 5, 18, 19                    | H-2 $\beta$                   | H-1 $\alpha$ , H-2 $\alpha$ , H-3-19 $\alpha$                              |
| 4        | 39.8 s          |                |                           |           |                                    |                               |                                                                            |
| 5        | 57.4 d          | 0.90 $\alpha$  | overlap                   | 1H        | 1, 7, 9, 10, 18, 19, 20            | H-2-6                         | H-3 $\alpha$ , H-2-6, H-3-19 $\alpha$                                      |
| 6        | 18.8 t          | 1.55           | overlap                   | 2H        | 4, 7, 8, 10                        | H-5 $\alpha$ , H-7 $\alpha$   | H-5 $\alpha$ , H-7 $\alpha$ , H-7 $\beta$ , H-3-15 $\beta$ , H-20a         |
| 7        | 42.9 t          | 1.14 $\alpha$  | td ( $J = 12.7, 4.2$ Hz)  | 1H        | 5, 6, 8, 9, 14, 15                 | H-7 $\beta$                   | H-5 $\alpha$ , H-2-6, H-7 $\beta$ , H-14 $\alpha$                          |
|          |                 | 1.91 $\beta$   | overlap                   | 1H        | 5, 6, 8, 9, 14, 15                 | H-6, H-7 $\alpha$             | H-6, H-7 $\alpha$ , H-3-15 $\beta$                                         |
| 8        | 38.6 s          |                |                           |           |                                    |                               |                                                                            |
| 9        | 62.6 d          | 1.04 $\alpha$  | dd ( $J = 11.5, 2.5$ Hz)  | 1H        | 1, 5, 7, 8, 10, 11, 12, 14, 15, 20 | H-2-11                        | H-1 $\alpha$ , H-5 $\alpha$ , H-7 $\alpha$ , H-2-11, H-14 $\alpha$         |
| 10       | 43.4 s          |                |                           |           |                                    |                               |                                                                            |
| 11       | 22.9 t          | 1.89           | overlap                   | 2H        | 8, 9, 12, 13                       | H-9 $\alpha$ , H-12 $\alpha$  | H-1 $\alpha$ , H-9 $\alpha$ , H-12 $\alpha$ , H-3-16 $\beta$               |
| 12       | 42.4 t          | 1.52 $\alpha$  | overlap                   | 1H        | 9, 11, 13, 16                      | H-2-11, H-12 $\beta$          | H-2-11, H-3-16 $\beta$                                                     |
|          |                 | 2.04 $\beta$   | dt ( $J = 12.2, 3.1$ Hz)  | 1H        | 9, 11, 13, 14, 16                  | H-2-11                        | H-2-11                                                                     |
| 13       | 86.3 s          |                |                           |           |                                    |                               |                                                                            |
| 14       | 53.8 d          | 1.56 $\alpha$  | overlap                   | 1H        | 7, 8, 9, 12, 15, 16, 17, 2'        | H-17 $\alpha$ , H-17 $\beta$  | H-7 $\alpha$ , H-9 $\alpha$ , H-12 $\alpha$ , H-17 $\alpha$ , H-17 $\beta$ |
| 15       | 16.1 q          | 1.09 $\beta$   | s                         | 3H        | 7, 8, 9, 14                        |                               | H-7 $\beta$ , H-3-16 $\beta$ , H-17 $\beta$                                |
| 16       | 20.5 q          | 1.29 $\beta$   | s                         | 3H        | 12, 13, 14                         |                               | H-12 $\beta$ , H-3-15 $\beta$ , H-17 $\beta$                               |
| 17       | 16.4 t          | 2.50 $\alpha$  | dd ( $J = 16.3, 4.8$ Hz)  | 1H        | 8, 13, 14, 1', 2', 3'              | H-14 $\alpha$ , H-17 $\beta$  | H-7 $\alpha$ , H-7 $\beta$ , H-14 $\alpha$ , H-17 $\beta$                  |
|          |                 | 2.16 $\beta$   | dd ( $J = 16.3, 12.8$ Hz) | 1H        | 8, 13, 14, 1', 2', 3'              | H-14 $\alpha$ , H-17 $\alpha$ | H-3-15 $\beta$ , H-3-16 $\beta$ , H-17 $\alpha$                            |
| 18       | 16.5 q          | 0.74 $\beta$   | s                         | 3H        | 3, 4, 5, 19                        |                               | H-2 $\beta$ , H-2-6, H-3-19 $\alpha$ , H-20a                               |
| 19       | 29.3 q          | 0.97 $\alpha$  | s                         | 3H        | 3, 4, 5, 18                        |                               | H-2 $\alpha$ , H-3 $\alpha$ , H-3-18 $\beta$                               |
| 20       | 62.3 t          | 3.94 $\alpha$  | d ( $J = 11.9$ Hz)        | 1H        | 1, 5, 9, 10                        | H-20b                         | H-1 $\beta$ , H-2 $\beta$ , H-3-18 $\beta$                                 |
|          |                 | 3.81b          | d ( $J = 11.9$ Hz)        | 1H        | 1, 5, 9, 10                        | H-20a                         | H-2-6, H-3-19 $\alpha$                                                     |
| 1'       | 165.1 s         |                |                           |           |                                    |                               |                                                                            |
| 2'       | 99.6 s          |                |                           |           |                                    |                               |                                                                            |
| 3'       | 182.9 s         |                |                           |           |                                    |                               |                                                                            |
| 4'       | 111.8 d         | 6.03           | d ( $J = 0.7$ Hz)         | 1H        | 2', 3', 5', 6'                     |                               | H-3-6'                                                                     |
| 5'       | 163.7 s         |                |                           |           |                                    |                               |                                                                            |
| 6'       | 19.1 q          | 2.24           | br s                      | 3H        | 4', 5'                             |                               | H-4'                                                                       |

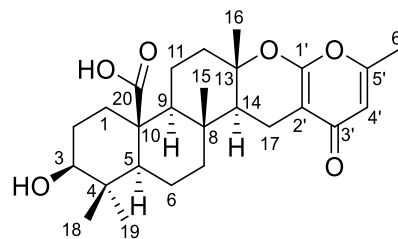

20-carboxychevalone E (**3**)

Table S6. NMR data for 20-carboxychevalone E (**3**) ( $^1\text{H}$  NMR:800 MHz,  $^{13}\text{C}$  NMR: 200 MHz,  $\delta$  in ppm, recorded in methanol- $d_4$ )

| position | $^{13}\text{C}$ | $^1\text{H}$   |                             |           |                                 |                                            |                                                                            |
|----------|-----------------|----------------|-----------------------------|-----------|---------------------------------|--------------------------------------------|----------------------------------------------------------------------------|
|          | $\delta$ (ppm)  | $\delta$ (ppm) | Multiplicity                | intensity | HMBC correlation                | COSY correlation                           | NOESY correlation                                                          |
| 1        | 38.7 t          | 0.91 $\alpha$  | br dd ( $J = 13.0, 2.5$ Hz) | 1H        | 2, 3, 5, 10                     | H-1 $\beta$ , H-2 $\alpha$                 | H-1 $\beta$ , H-2 $\alpha$ , H-3 $\alpha$ , H-9 $\alpha$                   |
| 2        | 29.9 t          | 2.62 $\beta$   | dt ( $J = 13.0, 3.1$ Hz)    | 1H        | 2, 3, 5, 9, 10, 20              | H-1 $\alpha$ , H-2 $\beta$                 | H-1 $\alpha$ , H-2 $\beta$ , H-11 $\beta$                                  |
|          |                 | 1.53 $\alpha$  | overlap                     | 1H        | 1, 3, 4, 10                     | H-1 $\alpha$ , H-3 $\alpha$                | H-1 $\alpha$ , H-1 $\beta$ , H-3 $\alpha$                                  |
|          |                 | 1.58 $\beta$   | overlap                     | 1H        | 1, 3, 4, 10                     | H-1 $\beta$                                | H-1 $\beta$ , H-3 $\alpha$                                                 |
| 3        | 80.1 d          | 3.15 $\alpha$  | dd ( $J = 11.8, 4.1$ Hz)    | 1H        | 1, 4, 18, 19                    | H-2 $\alpha$                               | H-2 $\alpha$ , H <sub>3</sub> -19 $\alpha$                                 |
| 4        | 40.6 s          |                |                             |           |                                 |                                            |                                                                            |
| 5        | 57.2 d          | 0.97 $\alpha$  | overlap                     | 1H        | 1, 6, 9, 10, 18, 19, 20         | H-6 $\beta$                                | H-3 $\alpha$ , H-6 $\alpha$ , H <sub>3</sub> -19 $\alpha$                  |
| 6        | 19.9 t          | 1.58 $\alpha$  | overlap                     | 1H        | 4, 5, 7, 8, 10                  | H-6 $\beta$                                | H-5 $\alpha$ , H-6 $\alpha$ , H-7 $\beta$                                  |
|          |                 | 2.57 $\beta$   | m                           | 1H        | 4, 5, 7, 10                     | H-5 $\alpha$ , H-6 $\alpha$ , H-7 $\alpha$ | H-6 $\alpha$ , H-6 $\beta$ , H-7 $\alpha$ , H <sub>3</sub> -15 $\beta$     |
|          |                 | 1.11 $\alpha$  | td ( $J = 12.9, 3.4$ Hz)    | 1H        | 5, 6, 8, 14, 15                 | H-6 $\beta$ , H-7 $\beta$                  | H-5 $\alpha$ , H <sub>2</sub> -6, H-7 $\beta$ , H-14 $\alpha$              |
| 7        | 42.8 t          | 1.92 $\beta$   | dt ( $J = 12.9, 3.3$ Hz)    | 1H        | 5, 6, 8, 9, 15                  | H-6 $\alpha$ , H-7 $\alpha$                | H <sub>2</sub> -6, H-7 $\alpha$ , H <sub>3</sub> -15 $\beta$               |
|          |                 |                |                             |           |                                 |                                            |                                                                            |
| 8        | 38.7 s          |                |                             |           |                                 |                                            |                                                                            |
| 9        | 60.7 d          | 1.15 $\alpha$  | br d ( $J = 10.9$ Hz)       | 1H        | 1, 5, 8, 10, 11, 12, 14, 15, 20 | H-11 $\alpha$                              | H-1 $\alpha$ , H-5 $\alpha$ , H-7 $\alpha$ , H-11 $\alpha$ , H-14 $\alpha$ |
| 10       | 49.8 s          |                |                             |           |                                 |                                            |                                                                            |
| 11       | 22.0 t          | 1.58 $\beta$   | overlap                     | 1H        | 8, 9, 12, 13                    | H-9 $\alpha$ , H-11 $\beta$                | H-11 $\alpha$ , H <sub>3</sub> -15 $\beta$ , H <sub>3</sub> -16 $\beta$    |
|          |                 | 2.04 $\alpha$  | dd ( $J = 14.1, 1.7$ Hz)    | 1H        | 8, 9, 10, 12, 13                | H-12 $\alpha$                              | H-9 $\alpha$ , H-11 $\alpha$ , H-12 $\beta$                                |
|          |                 | 1.68 $\alpha$  | m                           | 1H        | 9, 13, 16                       | H-12 $\beta$                               | H-9 $\alpha$ , H-14 $\alpha$ , H-17 $\alpha$                               |
| 12       | 41.5 t          | 2.12 $\beta$   | overlap                     | 1H        | 9, 13, 14, 16                   | H-11 $\beta$                               | H-11 $\beta$ , H <sub>3</sub> -16 $\beta$                                  |
|          |                 |                |                             |           |                                 |                                            |                                                                            |
| 13       | 86.2 s          |                |                             |           |                                 |                                            |                                                                            |
| 14       | 53.6 d          | 1.50 $\alpha$  | dd ( $J = 12.7, 4.9$ Hz)    | 1H        | 7, 8, 9, 12, 15, 16, 17, 2'     | H-17 $\alpha$ , H-17 $\beta$               | H-9 $\alpha$ , H-12 $\alpha$ , H-17 $\alpha$                               |
| 15       | 14.6 q          | 0.96 $\beta$   | s                           | 3H        | 7, 8, 9, 14                     |                                            | H-7 $\beta$ , H <sub>3</sub> -16 $\beta$ , H-17 $\beta$                    |
| 16       | 20.8 q          | 1.28 $\beta$   | s                           | 3H        | 12, 13, 14                      |                                            | H-12 $\beta$ , H <sub>3</sub> -15 $\beta$ , H-17 $\beta$                   |
| 17       | 16.4 t          | 2.10 $\beta$   | overlap                     | 1H        | 8, 13, 14, 1', 2', 3'           | H-14 $\alpha$ , H-17 $\alpha$              | H-7 $\alpha$ , H-7 $\beta$ , H-14 $\alpha$ , H-17 $\alpha$                 |
|          |                 | 2.51 $\alpha$  | dd ( $J = 16.3, 4.8$ Hz)    | 1H        | 13, 14, 1', 2', 3'              | H-14 $\alpha$ , H-17 $\beta$               | H <sub>3</sub> -15 $\beta$ , H <sub>3</sub> -16 $\beta$ , H-17 $\beta$     |
|          |                 |                |                             |           |                                 |                                            |                                                                            |
| 18       | 17.1 q          | 0.86 $\beta$   | s                           | 3H        | 3, 4, 5, 19                     |                                            | H-2 $\beta$ , H-6 $\beta$ , H <sub>3</sub> -19 $\alpha$                    |
| 19       | 28.9 q          | 0.98 $\alpha$  | s                           | 3H        | 3, 4, 5, 18                     |                                            | H-3 $\alpha$ , H-6 $\alpha$ , H <sub>3</sub> -18 $\beta$                   |
| 20       | 180.3 s         |                |                             |           |                                 |                                            |                                                                            |
| 1'       | 165.2 s         |                |                             |           |                                 |                                            |                                                                            |
| 2'       | 99.7 s          |                |                             |           |                                 |                                            |                                                                            |
| 3'       | 183.0 s         |                |                             |           |                                 |                                            |                                                                            |
| 4'       | 111.8 d         | 6.03           | d ( $J = 0.4$ Hz)           | 1H        | 2', 3', 5', 6'                  |                                            | H <sub>3</sub> -6'                                                         |
| 5'       | 163.7 s         |                |                             |           |                                 |                                            |                                                                            |
| 6'       | 19.1 q          | 3.03           | dt ( $J = 3.2, 0.4$ Hz)     | 3H        | 4', 5'                          |                                            | H-4'                                                                       |

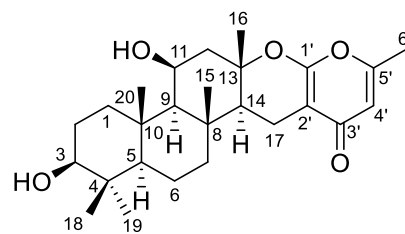

**11-hydroxychevalone E (4)**

Table S7. **NMR data for 11-hydroxychevalone E (4)** ( $^1\text{H}$  NMR: 800 MHz,  $^{13}\text{C}$  NMR: 200 MHz,  $\delta$  in ppm, recorded in pyridine- $d_5$ )

| position | $^{13}\text{C}$ | $^1\text{H}$   |                              |           |                                    |                                             |                                                                                               |
|----------|-----------------|----------------|------------------------------|-----------|------------------------------------|---------------------------------------------|-----------------------------------------------------------------------------------------------|
|          | $\delta$ (ppm)  | $\delta$ (ppm) | Multiplicity                 | intensity | HMBC correlation                   | COSY correlation                            | NOESY correlation                                                                             |
| 1        | 38.7 t          | 1.06 $\alpha$  | overlap                      | 1H        | 9, 20                              | H-1 $\beta$ , H-2 $\beta$                   | H-1 $\beta$ , H-2 $\alpha$ , H-3 $\alpha$ , H-9 $\alpha$                                      |
| 2        | 28.2 t          | 1.98 $\beta$   | overlap                      | 1H        | 2, 3, 5, 10, 20                    | H-1 $\alpha$                                | H-1 $\alpha$ , H-11 $\beta$ , H-3-20 $\beta$                                                  |
|          |                 | 1.99 $\beta$   | overlap                      | 1H        | 1, 3, 10                           | H-1 $\alpha$ , H-3 $\alpha$                 | H-1 $\alpha$ , H-1 $\beta$ , H-3 $\alpha$                                                     |
|          |                 | 0.89 $\alpha$  | m                            | 1H        | 3, 10                              | H-3 $\alpha$                                | H-1 $\beta$                                                                                   |
| 3        | 78.0 d          | 3.44 $\alpha$  | br d ( $J = 11.6$ Hz)        | 1H        | 2, 4, 18, 19                       | H-2 $\alpha$ , H-2 $\beta$                  | H-2 $\alpha$ , H-5 $\alpha$ , H-3-18 $\beta$ , H-3-19 $\alpha$                                |
| 4        | 39.6 s          |                |                              |           |                                    |                                             |                                                                                               |
| 5        | 56.4 d          | 0.78 $\alpha$  | dd ( $J = 9.5, 5.0$ Hz)      | 1H        | 4, 7, 9, 10, 18, 19, 20            | H-2-6                                       | H-1 $\alpha$ , H-3 $\alpha$ , H-9 $\alpha$ , H-3-19 $\alpha$                                  |
| 6        | 18.8 t          | 1.58           | m                            | 2H        | 4, 5, 7, 8                         | H-5 $\alpha$ , H-7 $\alpha$                 | H-5 $\alpha$ , H-6 $\alpha$ , H-7 $\beta$ , H-3-15 $\beta$ , H-3-18 $\beta$ , H-3-19 $\alpha$ |
| 7        | 43.4 t          | 0.97 $\alpha$  | m                            | 1H        | 5, 8, 9, 14, 15                    | H-2-6, H-7 $\beta$                          | H-5 $\alpha$ , H-2-6, H-7 $\beta$ , H-14 $\alpha$                                             |
|          |                 | 1.71 $\beta$   | overlap                      | 1H        | 5, 8, 9, 14, 15                    | H-7 $\alpha$                                | H-2-6, H-7 $\alpha$ , H-3-15 $\beta$ , H-17 $\beta$                                           |
| 8        | 37.9 s          |                |                              |           |                                    |                                             |                                                                                               |
| 9        | 60.9 d          | 0.89 $\alpha$  | dd ( $J = 6.6, 4.5$ Hz)      | 1H        | 1, 5, 7, 8, 10, 11, 12, 14, 15, 20 | H-11 $\alpha$                               | H-1 $\alpha$ , H-5 $\alpha$ , H-11 $\alpha$ , H-12 $\alpha$ , H-14 $\alpha$                   |
| 10       | 38.5 s          |                |                              |           |                                    |                                             |                                                                                               |
| 11       | 66.5 d          | 4.78 $\alpha$  | br s                         | 1H        | 8, 9, 13                           | H-9 $\alpha$ , H-12 $\alpha$ , H-12 $\beta$ | H-1 $\alpha$ , H-9 $\alpha$ , H-12 $\alpha$                                                   |
| 12       | 48.9 t          | 2.05 $\alpha$  | dd ( $J = 13.2, 3.1$ Hz)     | 1H        | 11, 13, 16                         | H-11 $\alpha$ , H-12 $\beta$                | H-9 $\alpha$ , H-11 $\alpha$ , H-12 $\beta$ , H-14 $\alpha$                                   |
|          |                 | 2.48 $\beta$   | overlap                      | 1H        | 9, 11, 13, 14, 16                  | H-11 $\alpha$ , H-12 $\alpha$               | H-11 $\alpha$ , H-12 $\alpha$ , H-3-15 $\beta$ , H-3-16 $\beta$                               |
| 13       | 84.7 s          |                |                              |           |                                    |                                             |                                                                                               |
| 14       | 53.2 d          | 1.63 $\alpha$  | dd ( $J = 12.7, 4.8$ Hz, 1H) | 1H        | 8, 9, 12, 13, 15, 16, 17, 2'       | H-17 $\alpha$ , H-17 $\beta$                | H-7 $\alpha$ , H-9 $\alpha$ , H-12 $\alpha$ , H-17 $\alpha$                                   |
| 15       | 17.5 q          | 1.41 $\beta$   | s                            | 3H        | 7, 8, 9, 14                        |                                             | H-2-6, H-3-16 $\beta$ , H-17 $\beta$                                                          |
| 16       | 22.0 q          | 1.52 $\beta$   | s                            | 3H        | 12, 13, 14                         |                                             | H-3-15 $\beta$ , H-17 $\beta$                                                                 |
| 17       | 16.1 t          | 2.49 $\beta$   | overlap                      | 1H        | 13, 14, 1', 2', 3'                 | H-14 $\alpha$ , H-17 $\alpha$               | H-7 $\alpha$ , H-7 $\beta$ , H-14 $\alpha$ , H-17 $\alpha$                                    |
|          |                 | 2.88 $\alpha$  | dd ( $J = 16.2, 4.8$ Hz, 1H) | 1H        | 8, 13, 14, 1', 2', 3'              | H-14 $\alpha$ , H-17 $\beta$                | H-3-15 $\beta$ , H-3-16 $\beta$ , H-17 $\beta$                                                |
| 18       | 16.2 q          | 1.08 $\beta$   | s                            | 3H        | 3, 4, 5, 19                        |                                             | H-2-6, H-3-19 $\alpha$ , H-3-20 $\beta$                                                       |
| 19       | 28.7 q          | 1.22 $\alpha$  | s                            | 3H        | 3, 4, 5, 18                        |                                             | H-5 $\alpha$ , H-3-18 $\beta$                                                                 |
| 20       | 17.8 q          | 1.52 $\beta$   | s                            | 3H        | 1, 5, 9, 10                        |                                             | H-1 $\beta$ , H-3-15 $\beta$ , H-3-18 $\beta$                                                 |
| 1'       | 162.6 s         |                |                              |           |                                    |                                             |                                                                                               |
| 2'       | 98.9 s          |                |                              |           |                                    |                                             |                                                                                               |
| 3'       | 179.9 s         |                |                              |           |                                    |                                             |                                                                                               |
| 4'       | 112.3 d         | 6.19           | d ( $J = 0.4$ Hz)            | 1H        | 2', 3', 5', 6'                     |                                             | H-3-6'                                                                                        |
| 5'       | 160.7 s         |                |                              |           |                                    |                                             |                                                                                               |
| 6'       | 18.8 q          | 2.01           | s                            | 3H        | 4', 5'                             |                                             | H-4'                                                                                          |

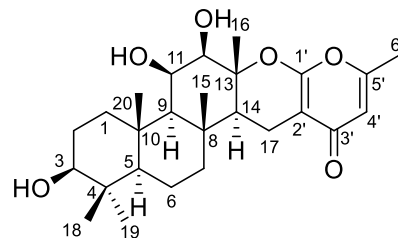

**11,12-dihydroxychevalone E (5)**

Table S8. NMR data for 11,12-dihydroxychevalone E (5) ( $^1\text{H}$  NMR:800 MHz,  $^{13}\text{C}$  NMR: 200 MHz,  $\delta$  in ppm, recorded in pyridine- $d_5$ )

| position | $^{13}\text{C}$ | $^1\text{H}$   |                           |           |                                    |                                              |                                                                                                                     |
|----------|-----------------|----------------|---------------------------|-----------|------------------------------------|----------------------------------------------|---------------------------------------------------------------------------------------------------------------------|
|          | $\delta$ (ppm)  | $\delta$ (ppm) | Multiplicity              | intensity | HMBC correlation                   | COSY correlation                             | NOESY correlation                                                                                                   |
| 1        | 38.6 t          | 1.02 $\alpha$  | td ( $J = 12.4, 2.9$ Hz)  | 1H        | 2, 3, 5, 9, 10, 20                 | H-1 $\beta$ , H-2 $\beta$                    | H-1 $\beta$ , H-3 $\alpha$ , H-5 $\alpha$ , H-9 $\alpha$ , H-11 $\alpha$                                            |
| 2        | 28.1 t          | 1.93 $\beta$   | dt ( $J = 12.4, 3.3$ Hz)  | 1H        | 2, 3, 5, 10, 20                    | H-1 $\alpha$                                 | H-1 $\alpha$ , H-2 $\alpha$ , H-11 $\alpha$ , H <sub>3</sub> -20 $\beta$                                            |
|          |                 | 1.97 $\beta$   | m                         | 1H        | 3, 10                              | H-1 $\alpha$ , H-3 $\alpha$ , 3-OH $\beta$   | H-1 $\alpha$ , H-1 $\beta$ , H-2 $\beta$ , H-3 $\alpha$                                                             |
|          |                 | 1.83 $\alpha$  | m                         | 1H        | 3, 10                              | H-1 $\beta$ , H-3 $\alpha$                   | H-1 $\alpha$ , H-2 $\alpha$ , H <sub>3</sub> -20 $\beta$                                                            |
| 3        | 78.0 d          | 3.41 $\alpha$  | m                         | 1H        | 4, 18, 19                          | H-2 $\alpha$ , H-2 $\beta$                   | H-1 $\alpha$ , H-2 $\alpha$ , H-5 $\alpha$ , H <sub>3</sub> -19 $\alpha$                                            |
| 4        | 39.5 s          |                |                           |           |                                    |                                              |                                                                                                                     |
| 5        | 56.5 d          | 0.78 $\alpha$  | dd ( $J = 10.3, 4.2$ Hz)  | 1H        | 1, 3, 4, 6, 7, 9, 10, 18, 19, 20   | H <sub>2</sub> -6                            | H-3 $\alpha$ , H <sub>2</sub> -6, H-9 $\alpha$ , H <sub>3</sub> -19 $\alpha$                                        |
| 6        | 18.8 t          | 1.59           | overlap                   | 2H        | 4, 5, 7, 8, 10                     | H-5 $\alpha$ , H-7 $\alpha$                  | H-5 $\alpha$ , H-7 $\alpha$ , H <sub>3</sub> -15 $\beta$ , H <sub>3</sub> -18 $\beta$ , H <sub>3</sub> -19 $\alpha$ |
| 7        | 43.3 t          | 0.94 $\alpha$  | overlap                   | 1H        | 5, 8, 14, 15                       | H <sub>2</sub> -6, H-7 $\beta$               | H-5 $\alpha$ , H <sub>2</sub> -6, H-7 $\beta$ , H-14 $\alpha$                                                       |
|          |                 | 1.70 $\beta$   | dt ( $J = 12.3, 3.0$ Hz)  | 1H        | 5, 8, 9, 15                        | H-7 $\alpha$                                 | H <sub>2</sub> -6, H-7 $\alpha$ , H <sub>3</sub> -15 $\beta$ , H-17 $\beta$                                         |
| 8        | 37.9 s          |                |                           |           |                                    |                                              |                                                                                                                     |
| 9        | 59.8 d          | 0.95 $\alpha$  | overlap                   | 1H        | 1, 5, 7, 8, 10, 11, 12, 14, 15, 20 | H-11 $\alpha$                                | H-1 $\alpha$ , H-5 $\alpha$ , H-11 $\alpha$ , H-12 $\alpha$ , H-14 $\alpha$                                         |
| 10       | 38.4 s          |                |                           |           |                                    |                                              |                                                                                                                     |
| 11       | 71.5 d          | 4.77 $\alpha$  | br s                      | 1H        | 8, 9, 10, 12, 13                   | H-9 $\alpha$ , 11-OH $\beta$ , H-12 $\alpha$ | H-1 $\alpha$ , H-9 $\alpha$ , 11-OH $\beta$ , H-12 $\alpha$                                                         |
| 12       | 78.0 d          | 4.04 $\alpha$  | br s                      | 1H        | 13, 16                             | H-11 $\alpha$                                | H-9 $\alpha$ , H-11 $\alpha$ , 12-OH $\beta$ , H-14 $\alpha$ , H <sub>3</sub> -16 $\beta$                           |
| 13       | 88.8 s          |                |                           |           |                                    |                                              |                                                                                                                     |
| 14       | 51.7 d          | 1.60 $\alpha$  | overlap                   | 1H        | 7, 8, 9, 12, 13, 15, 16, 17, 2'    | H-17 $\alpha$ , H-17 $\beta$                 | H-7 $\alpha$ , H-9 $\alpha$ , H-12 $\alpha$ , H-17 $\alpha$                                                         |
| 15       | 17.5 q          | 1.42 $\beta$   | s                         | 3H        | 7, 8, 9, 14                        |                                              | 11-OH $\beta$ , H <sub>3</sub> -16 $\beta$ , H-17 $\beta$ , H <sub>3</sub> -20 $\beta$                              |
| 16       | 16.0 q          | 1.77 $\beta$   | s                         | 3H        | 12, 13, 14                         |                                              | 11-OH $\beta$ , H-12 $\alpha$ , H <sub>3</sub> -15 $\beta$ , H-17 $\beta$                                           |
| 17       | 15.9 t          | 2.56 $\beta$   | dd ( $J = 16.0, 12.7$ Hz) | 1H        | 8, 13, 14, 1', 2', 3'              | H-14 $\alpha$ , H-17 $\alpha$                | H <sub>3</sub> -15 $\beta$ , H <sub>3</sub> -16 $\beta$ , H-17 $\alpha$                                             |
|          |                 | 2.89 $\alpha$  | dd ( $J = 16.0, 4.8$ Hz)  | 1H        | 12, 13, 14, 1', 2', 3'             | H-14 $\alpha$ , H-17 $\beta$                 | H-7 $\alpha$ , H-7 $\beta$ , H-14 $\alpha$ , H-17 $\beta$                                                           |
| 18       | 16.1 q          | 1.08 $\beta$   | s                         | 3H        | 3, 4, 5, 19                        |                                              | H-2 $\beta$ , H <sub>2</sub> -6, H <sub>3</sub> -19 $\alpha$ , H <sub>3</sub> -20 $\beta$                           |
| 19       | 28.7 q          | 1.21 $\alpha$  | s                         | 3H        | 3, 4, 5, 18                        |                                              | H-3 $\alpha$ , H-5 $\alpha$ , H <sub>3</sub> -18 $\beta$                                                            |
| 20       | 18.8 q          | 1.56 $\beta$   | s                         | 3H        | 1, 5, 9, 10                        |                                              | H-1 $\beta$ , H <sub>3</sub> -15 $\beta$ , H <sub>3</sub> -18 $\beta$                                               |
| 1'       | 162.8 s         |                |                           |           |                                    |                                              |                                                                                                                     |
| 2'       | 98.7 s          |                |                           |           |                                    |                                              |                                                                                                                     |
| 3'       | 179.8 s         |                |                           |           |                                    |                                              |                                                                                                                     |
| 4'       | 112.3 d         | 6.18           | d ( $J = 0.4$ Hz)         | 1H        | 2', 3', 5', 6'                     |                                              | H <sub>3</sub> -6'                                                                                                  |
| 5'       | 160.6 s         |                |                           |           |                                    |                                              |                                                                                                                     |
| 6'       | 18.3 q          | 2.00           | s                         | 3H        | 4', 5'                             |                                              | H-4'                                                                                                                |
| 3-OH     |                 | 5.75 $\beta$   | d ( $J = 5.3$ Hz)         | 1H        | 2, 3, 4                            | H-3 $\alpha$                                 | H-2 $\alpha$ , H-2 $\beta$ , H-3 $\alpha$ , H <sub>3</sub> -18 $\beta$ , H <sub>3</sub> -19 $\alpha$                |
| 11-OH    |                 | 5.92 $\beta$   | br s                      | 1H        | 9, 11                              | H-11 $\alpha$                                | H <sub>3</sub> -15 $\beta$ , H <sub>3</sub> -16 $\beta$ , H <sub>3</sub> -20 $\beta$                                |
| 12-OH    |                 | 7.19 $\beta$   | br s                      | 1H        | 11, 12, 13                         | H-12 $\alpha$                                | 11-OH $\beta$ , H-12 $\alpha$ , H <sub>3</sub> $\beta$                                                              |

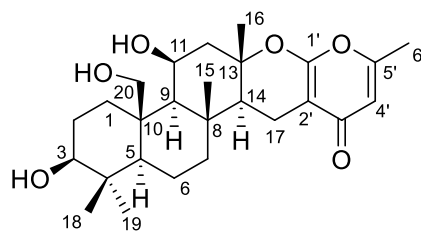

**11,20-dihydroxychevalone E (6)**

**Table S9. NMR data for 11,20-dihydroxychevalone E (6)** ( $^1\text{H}$  NMR:800 MHz,  $^{13}\text{C}$  NMR: 200 MHz,  $\delta$  in ppm, recorded in pyridine- $d_5$ )

| position | $^{13}\text{C}$ | $^1\text{H}$   |                           |           |                                 |                                             |                                                                                              |
|----------|-----------------|----------------|---------------------------|-----------|---------------------------------|---------------------------------------------|----------------------------------------------------------------------------------------------|
|          | $\delta$ (ppm)  | $\delta$ (ppm) | Multiplicity              | intensity | HMBC correlation                | COSY correlation                            | NOESY correlation                                                                            |
| 1        | 32.7 t          | 0.93 $\alpha$  | td ( $J = 13.0, 2.6$ Hz)  | 1H        | 2, 3, 9, 10, 20                 | H-1 $\beta$ , H-2 $\alpha$ , H-2 $\beta$    | H-1 $\beta$ , H-2 $\alpha$ , H-3 $\alpha$ , H-9 $\alpha$ , H-11 $\alpha$                     |
| 2        | 27.8 t          | 2.61 $\beta$   | dt ( $J = 13.0, 3.2$ Hz)  | 1H        | 2, 3, 5, 10                     | H-1 $\alpha$ , H-2 $\alpha$                 | H-1 $\alpha$ , H-2 $\alpha$ , H-2 $\beta$ , H-20 $\alpha$                                    |
|          |                 | 1.91 $\alpha$  | m                         | 1H        | 1, 3, 4, 10                     | H-1 $\alpha$ , H-1 $\beta$ , H-3 $\alpha$   | H-1 $\alpha$ , H-1 $\beta$ , H-3 $\alpha$                                                    |
|          |                 | 1.99 $\beta$   | s                         | 1H        | 1, 3, 4, 10                     | H-1 $\alpha$ , H-3 $\alpha$                 | H-1 $\beta$ , H-3 $\alpha$ , H-18 $\beta$ , H-20 $\alpha$                                    |
|          |                 | 3.51 $\alpha$  | d ( $J = 10.2$ Hz)        | 1H        | 4, 18, 19                       | H-2 $\alpha$ , H-2 $\beta$                  | H-1 $\alpha$ , H-2 $\alpha$ , H-2 $\beta$ , H-5 $\alpha$ , H-3-18 $\beta$ , H-3-19 $\alpha$  |
| 4        | 39.5 s          |                |                           |           |                                 |                                             |                                                                                              |
| 5        | 57.4 d          | 1.03 $\alpha$  | overlap                   | 1H        | 1, 3, 4, 6, 9, 10, 18, 19, 20   | H-2-6                                       | H-3 $\alpha$ , H-2-6, H-9 $\alpha$ , H-3-19 $\alpha$                                         |
| 6        | 18.3 t          | 1.51           | m                         | 2H        | 5, 7, 8, 9, 10                  | H-5 $\alpha$ , H-7 $\alpha$                 | H-5 $\alpha$ , H-7 $\alpha$ , H-7 $\beta$ , H-17 $\alpha$ , H-3-19 $\alpha$                  |
| 7        | 44.0 t          | 1.01 $\alpha$  | overlap                   | 1H        | 6, 8, 9, 14                     | H-2-6, H-7 $\beta$                          | H-2-6, H-7 $\beta$ , H-9 $\alpha$ , H-14 $\alpha$                                            |
|          |                 | 1.73 $\beta$   | overlap                   | 1H        | 5, 6, 8, 9, 14, 15              | H-7 $\alpha$                                | H-2-6, H-7 $\alpha$ , H-3-15 $\beta$                                                         |
| 8        | 37.7 s          |                |                           |           |                                 |                                             |                                                                                              |
| 9        | 62.9 d          | 1.15 $\alpha$  | s                         | 1H        | 1, 5, 8, 10, 11, 12, 14, 15, 20 | H-11 $\alpha$                               | H-1 $\alpha$ , H-7 $\alpha$ , H-11 $\alpha$ , H-12 $\alpha$ , H-14 $\alpha$                  |
| 10       | 44.0 s          |                |                           |           |                                 |                                             |                                                                                              |
| 11       | 65.3 d          | 4.62 $\alpha$  | br s                      | 1H        | 8, 9, 10, 12, 13                | H-9 $\alpha$ , H-12 $\alpha$ , H-12 $\beta$ | H-1 $\alpha$ , H-9 $\alpha$ , H-12 $\alpha$ , H-12 $\beta$ , H-3-15 $\beta$ , H-3-16 $\beta$ |
| 12       | 46.6 t          | 2.07 $\alpha$  | dd ( $J = 13.0, 3.2$ Hz)  | 1H        | 11, 13, 14, 16                  | H-11 $\alpha$ , H-12 $\beta$                | H-9 $\alpha$ , H-11 $\alpha$ , H-12 $\beta$ , H-14 $\alpha$ , H-3-16 $\beta$                 |
|          |                 | 2.65 $\beta$   | dd ( $J = 13.0, 2.9$ Hz)  | 1H        | 9, 11, 13, 14, 16               | H-11 $\alpha$ , H-12 $\alpha$               | H-11 $\alpha$ , H-12 $\alpha$ , H-3-16 $\beta$                                               |
| 13       | 84.7 s          |                |                           |           |                                 |                                             |                                                                                              |
| 14       | 53.7 d          | 1.66 $\alpha$  | dd ( $J = 12.7, 4.8$ Hz)  | 1H        | 7, 8, 9, 12, 13, 15, 16, 17, 2' | H-17 $\alpha$ , H-17 $\beta$                | H-7 $\alpha$ , H-9 $\alpha$ , H-12 $\alpha$ , H-17 $\alpha$ , H-17 $\beta$                   |
| 15       | 17.5 q          | 1.49 $\beta$   | s                         | 3H        | 7, 8, 9, 14                     |                                             | H-7 $\beta$ , H-3-16 $\beta$ , H-17 $\beta$ , H-20 $\beta$                                   |
| 16       | 22.0 q          | 1.73 $\beta$   | s                         | 3H        | 12, 13, 14                      |                                             | H-12 $\alpha$ , H-12 $\beta$ , H-3-15 $\beta$ , H-17 $\beta$                                 |
| 17       | 16.2 t          | 2.48 $\beta$   | dd ( $J = 16.2, 12.7$ Hz) | 1H        | 8, 13, 14, 1', 2', 3'           | H-14 $\alpha$ , H-17 $\alpha$               | H-15 $\beta$ , H-3-16 $\beta$ , H-17 $\alpha$                                                |
|          |                 | 2.88 $\alpha$  | dd ( $J = 16.2, 4.8$ Hz)  | 1H        | 8, 13, 14, 1', 2', 3'           | H-14 $\alpha$ , H-17 $\beta$                | H-7 $\alpha$ , H-14 $\alpha$ , H-17 $\beta$                                                  |
| 18       | 17.4 q          | 1.06 $\beta$   | s                         | 3H        | 3, 4, 5, 19                     |                                             | H-2 $\beta$ , H-3 $\alpha$ , H-3-19 $\alpha$ , H-20 $\alpha$                                 |
| 19       | 29.8 q          | 1.25 $\alpha$  | s                         | 3H        | 3, 4, 5, 18                     |                                             | H-3 $\alpha$ , H-2-6, H-3-18 $\beta$                                                         |
| 20       | 59.6 t          | 4.18 $\beta$   | d ( $J = 11.8$ Hz)        | 1H        | 1, 5, 9, 10                     | H-20 $\alpha$                               | H-3-15 $\beta$ , H-20 $\alpha$                                                               |
|          |                 | 4.38 $\alpha$  | d ( $J = 11.8$ Hz)        | 1H        | 1, 5, 9, 10                     | H-20 $\beta$                                | H-1 $\beta$ , H-2 $\beta$ , H-7 $\beta$ , H-3-18 $\beta$ , H-20 $\beta$                      |
| 1'       | 162.7 s         |                |                           |           |                                 |                                             |                                                                                              |
| 2'       | 98.8 s          |                |                           |           |                                 |                                             |                                                                                              |
| 3'       | 197.9 s         |                |                           |           |                                 |                                             |                                                                                              |
| 4'       | 112.3 d         | 6.20           | d ( $J = 0.7$ Hz)         | 1H        | 2', 3', 5', 6'                  |                                             | H-6'                                                                                         |
| 5'       | 160.7 s         |                |                           |           |                                 |                                             |                                                                                              |
| 6'       | 18.9 q          | 2.02           | s                         | 3H        | 4', 5'                          |                                             | H-4'                                                                                         |

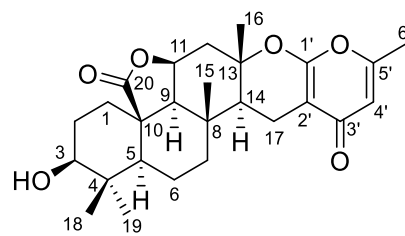

**20,11-olide-chevalone E (7)**

**Table S10. NMR data for 20,11-olide-chevalone E (7)** ( $^1\text{H}$  NMR: 800 MHz,  $^{13}\text{C}$  NMR: 200 MHz,  $\delta$  in ppm, recorded in pyridine- $d_5$ )

| position | $^{13}\text{C}$ | $^1\text{H}$                  |                                     |           |                                             |                                                                          |                                                                                                                                                        |
|----------|-----------------|-------------------------------|-------------------------------------|-----------|---------------------------------------------|--------------------------------------------------------------------------|--------------------------------------------------------------------------------------------------------------------------------------------------------|
|          | $\delta$ (ppm)  | $\delta$ (ppm)                | Multiplicity                        | intensity | HMBC correlation                            | COSY correlation                                                         | NOESY correlation                                                                                                                                      |
| 1        | 34.4 t          | 1.42 $\alpha$<br>2.17 $\beta$ | overlap<br>dt ( $J = 13.5, 3.5$ Hz) | 1H<br>1H  | 2, 3, 5, 10<br>2, 3, 5, 9, 10, 20           | H-1 $\beta$ , H-2 $\beta$<br>H-1 $\alpha$                                | H-1 $\beta$ , H-2 $\alpha$ , H-3 $\alpha$ , H-5 $\alpha$ , H-9 $\alpha$<br>H-1 $\alpha$ , H-2 $\alpha$ , H-11 $\alpha$                                 |
| 2        | 28.1 t          | 1.93 $\alpha$<br>2.21 $\beta$ | ddd ( $J = 12.7, 7.1, 3.5$ Hz)<br>m | 1H<br>1H  | 1, 3, 4, 10<br>1, 3, 4, 10                  | H-2 $\beta$ , H-3 $\alpha$<br>H-1 $\alpha$ , H-2 $\alpha$ , H-3 $\alpha$ | H-1 $\alpha$ , H-1 $\beta$ , H-2 $\beta$ , H-3 $\alpha$<br>H-1 $\alpha$ , H-2 $\alpha$ , H-3-19 $\alpha$                                               |
| 3        | 77.8 d          | 3.50 $\alpha$                 | dd ( $J = 7.1, 4.3$ Hz)             | 1H        | 2, 4, 5, 10, 18, 19                         | H-2 $\alpha$ , H-2 $\beta$ , 3-OH                                        | H-1 $\alpha$ , H-2 $\alpha$ , 3-OH, H-5 $\alpha$ , H-3-18 $\beta$ , H-3-19 $\alpha$                                                                    |
| 4        | 39.9 s          |                               |                                     |           |                                             |                                                                          |                                                                                                                                                        |
| 5        | 51.0 d          | 1.40 $\alpha$                 | dd ( $J = 9.1, 3.7$ Hz)             | 1H        | 1, 3, 4, 6, 9, 10, 18, 19, 20               | H-2-6                                                                    | H-1 $\alpha$ , H-3 $\alpha$ , H-7 $\alpha$ , H-9 $\alpha$ , H-3-19 $\alpha$                                                                            |
| 6        | 19.5 t          | 1.66                          | overlap                             | 2H        | 4, 5, 7, 8, 10                              | H-5 $\alpha$ , H-7 $\alpha$                                              | H-5 $\alpha$ , H-7 $\alpha$ , H-7 $\beta$                                                                                                              |
| 7        | 35.4 t          | 1.09 $\alpha$<br>1.55 $\beta$ | td ( $J = 12.3, 4.7$ Hz)<br>m       | 1H<br>1H  | 5, 6, 8, 9, 14, 15<br>5, 6, 8, 9, 14, 15    | H-2-6, H-7 $\beta$<br>H-7 $\alpha$                                       | H-5 $\alpha$ , H-2-6, H-7 $\beta$ , H-9 $\alpha$ , H-14 $\alpha$ , H-17 $\alpha$<br>H-2-6, H-7 $\alpha$ , H-14 $\alpha$ , H-17 $\alpha$ , H-17 $\beta$ |
| 8        | 33.8 s          |                               |                                     |           |                                             |                                                                          |                                                                                                                                                        |
| 9        | 57.7 d          | 1.61 $\alpha$                 | d ( $J = 3.4$ Hz)                   | 1H        | 1, 7, 8, 10, 12, 14, 15, 20                 | H-11 $\alpha$                                                            | H-1 $\alpha$ , H-5 $\alpha$ , H-7 $\alpha$ , H-11 $\alpha$ , H-12 $\alpha$                                                                             |
| 10       | 48.9 s          |                               |                                     |           |                                             |                                                                          |                                                                                                                                                        |
| 11       | 73.8 d          | 4.96 $\alpha$                 | overlap                             | 1H        | 8, 9, 10, 12, 13                            | H-9 $\alpha$ , H-12 $\alpha$                                             | H-1 $\beta$ , H-9 $\alpha$ , H-12 $\alpha$ , H-12 $\beta$                                                                                              |
| 12       | 39.3 t          | 2.32 $\alpha$<br>2.62 $\beta$ | overlap<br>d ( $J = 16.4$ Hz)       | 1H<br>1H  | 9, 11, 13, 14, 16<br>9, 11, 13, 14, 16,     | H-11 $\alpha$ , H-12 $\beta$<br>H-12 $\alpha$                            | H-11 $\alpha$ , H-12 $\beta$ , H-14 $\alpha$<br>H-12 $\alpha$ , H-3-15 $\beta$ , H-3-16 $\beta$                                                        |
| 13       | 83.0 s          |                               |                                     |           |                                             |                                                                          |                                                                                                                                                        |
| 14       | 48.3 d          | 1.65 $\alpha$                 | overlap                             | 1H        | 7, 8, 9, 12, 13, 15, 16, 17, 2'             | H-17 $\alpha$ , H-17 $\beta$                                             | H-7 $\alpha$ , H-3-16 $\beta$ , H-17 $\alpha$                                                                                                          |
| 15       | 16.6 q          | 1.03 $\beta$                  | s                                   | 3H        | 7, 8, 9, 14                                 |                                                                          | H-7 $\beta$ , H-14 $\alpha$ , H-3-16 $\beta$ , H-17 $\beta$                                                                                            |
| 16       | 24.8 q          | 1.36 $\beta$                  | s                                   | 3H        | 12, 13, 14                                  |                                                                          | H-12 $\beta$ , H-3-15 $\beta$                                                                                                                          |
| 17       | 16.0 t          | 2.29 $\beta$<br>2.73 $\alpha$ | overlap<br>dd ( $J = 16.1, 4.7$ Hz) | 1H<br>1H  | 8, 13, 14, 1', 2', 3'<br>13, 14, 1', 2', 3' | H-14 $\alpha$ , H-17 $\alpha$<br>H-14 $\alpha$ , H-17 $\beta$            | H-7 $\beta$ , H-3-15 $\beta$ , H-3-16 $\beta$ , H-17 $\alpha$<br>H-7 $\alpha$ , H-7 $\beta$ , H-14 $\alpha$ , H-17 $\beta$                             |
| 18       | 15.9 q          | 1.64 $\beta$                  | s                                   | 3H        | 3, 4, 5, 19                                 |                                                                          | H-3 $\alpha$ , H-5 $\alpha$ , H-3-19 $\alpha$                                                                                                          |
| 19       | 28.3 q          | 1.21 $\alpha$                 | s                                   | 3H        | 3, 4, 5, 18                                 |                                                                          | H-3 $\alpha$ , H-3-18 $\beta$                                                                                                                          |
| 20       | 176.9 s         |                               |                                     |           |                                             |                                                                          |                                                                                                                                                        |
| 1'       | 162.8 s         |                               |                                     |           |                                             |                                                                          |                                                                                                                                                        |
| 2'       | 99.7 s          |                               |                                     |           |                                             |                                                                          |                                                                                                                                                        |
| 3'       | 179.7 s         |                               |                                     |           |                                             |                                                                          |                                                                                                                                                        |
| 4'       | 112.4 d         | 6.18                          | d ( $J = 0.8$ Hz)                   | 1H        | 2', 3', 5', 6'                              |                                                                          | H-3-6'                                                                                                                                                 |
| 5'       | 161.0 s         |                               |                                     |           |                                             |                                                                          |                                                                                                                                                        |
| 6'       | 18.8 q          | 2.03                          | d ( $J = 0.6$ Hz)                   | 3H        | 4', 5'                                      |                                                                          | H-4'                                                                                                                                                   |
| 3-OH     |                 | 6.11                          | s                                   | 1H        | 2, 3, 4                                     | H-3 $\alpha$                                                             | H-3 $\alpha$                                                                                                                                           |

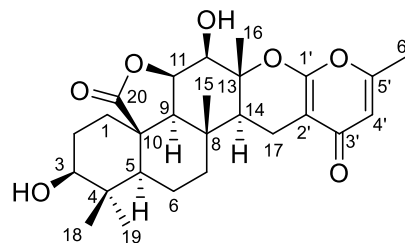

**12-hydroxy-20,11-olide-chevalone E (8)**

Table S11. NMR data for 12-hydroxy-20,11-olide-chevalone E (8) (<sup>1</sup>H NMR:800 MHz, <sup>13</sup>C NMR: 200 MHz,  $\delta$  in ppm, recorded in pyridine-*d*<sub>5</sub>)

| position | <sup>13</sup> C | <sup>1</sup> H |                           |           |                                    |                                            |                                                                              |
|----------|-----------------|----------------|---------------------------|-----------|------------------------------------|--------------------------------------------|------------------------------------------------------------------------------|
|          | $\delta$ (ppm)  | $\delta$ (ppm) | Multiplicity              | intensity | HMBC correlation                   | COSY correlation                           | NOESY correlation                                                            |
| 1        | 34.0 t          | 1.41 $\alpha$  | td ( $J$ = 13.5, 2.7 Hz)  | 1H        | 2, 3, 5, 9, 10, 20                 | H-1 $\beta$ , H-2 $\beta$                  | H-1 $\beta$ , H-2 $\alpha$ , H-3 $\alpha$ , H-9 $\alpha$                     |
| 2        | 28.0 t          | 2.17 $\beta$   | dt ( $J$ = 13.5, 3.4 Hz)  | 1H        | 2, 3, 5                            | H-1 $\alpha$ , H-2 $\alpha$                | H-1 $\alpha$ , H-2 $\alpha$ , H-11 $\alpha$                                  |
|          |                 | 1.91 $\alpha$  | m                         | 1H        | 1, 3, 4, 10                        | H-2 $\beta$ , H-3 $\alpha$                 | H-1 $\alpha$ , H-2 $\beta$ , H-3 $\alpha$                                    |
|          |                 | 2.23 $\beta$   | m                         | 1H        | 1, 3, 4, 10                        | H-1 $\alpha$ , H-2 $\alpha$ , H-3 $\alpha$ | H-1 $\alpha$ , H-2 $\alpha$ , H <sub>3</sub> -18 $\beta$                     |
| 3        | 77.8 d          | 3.50 $\alpha$  | d ( $J$ = 10.6 Hz)        | 1H        | 2, 4, 18, 19                       | H-2 $\alpha$ , H-2 $\beta$ , 3-OH          | H-2 $\alpha$ , H-5 $\alpha$ , H <sub>3</sub> -19 $\alpha$                    |
| 4        | 39.9 s          |                |                           |           |                                    |                                            |                                                                              |
| 5        | 51.1 d          | 1.45 $\alpha$  | dd ( $J$ = 13.2, 5.4 Hz)  | 1H        | 1, 3, 4, 6, 7, 9, 10, 18, 19, 20   | H <sub>2</sub> -6                          | H-3 $\alpha$ , H <sub>2</sub> -6, H-9 $\alpha$ , H <sub>3</sub> -19 $\alpha$ |
| 6        | 19.8 t          | 1.71           | m                         | 2H        | 4, 5, 8, 10                        | H-5 $\alpha$ , H-7 $\alpha$                | H-5 $\alpha$ , H-7 $\alpha$                                                  |
| 7        | 35.7 t          | 1.15 $\alpha$  | overlap                   | 1H        | 5, 6, 8, 9, 14, 15                 | H <sub>2</sub> -6, H-7 $\beta$ ,           | H-7 $\beta$ , H-17 $\alpha$                                                  |
|          |                 | 1.60 $\beta$   | m                         | 1H        | 5, 6, 8, 9                         | H-7 $\alpha$                               | H <sub>2</sub> -6, H-7 $\alpha$                                              |
| 8        | 34.8 s          |                |                           |           |                                    |                                            |                                                                              |
| 9        | 57.1 d          | 1.75 $\alpha$  | overlap                   | 1H        | 1, 5, 7, 8, 10, 11, 12, 14, 15, 20 | H-11 $\alpha$                              | H-1 $\alpha$ , H-5 $\alpha$ , H-11 $\alpha$ , H-12 $\alpha$ , H-14 $\alpha$  |
| 10       | 49.0 s          |                |                           |           |                                    |                                            |                                                                              |
| 11       | 77.5 d          | 5.25 $\alpha$  | dd ( $J$ = 5.7, 2.9 Hz)   | 1H        | 8, 9, 10, 12, 13                   | H-9 $\alpha$ , H-12 $\alpha$               | H-9 $\alpha$ , H-12 $\alpha$                                                 |
| 12       | 75.9 d          | 4.44 $\alpha$  | d ( $J$ = 5.1 Hz)         | 1H        | 13, 16                             | H-11 $\alpha$ , 12-OH $\beta$              | H-9 $\alpha$ , H-11 $\alpha$                                                 |
| 13       | 88.4 s          |                |                           |           |                                    |                                            |                                                                              |
| 14       | 47.1 d          | 1.75 $\alpha$  | overlap                   | 1H        | 7, 8, 9, 12, 13, 15, 16, 17, 2'    | H-17 $\alpha$ , H-17 $\beta$               | H-9 $\alpha$ , H-12 $\alpha$ , H-17 $\alpha$                                 |
| 15       | 16.6 q          | 1.17 $\alpha$  | s                         | 3H        | 7, 8, 9, 14                        |                                            | H-7 $\beta$ , H <sub>3</sub> -16 $\beta$ , H-17 $\beta$                      |
| 16       | 19.4 q          | 1.67 $\alpha$  | m                         | 3H        | 12, 13, 14                         |                                            | H-12 $\alpha$ , H <sub>3</sub> -15 $\beta$ , H-17 $\beta$                    |
| 17       | 15.9 t          | 2.50 $\beta$   | dd ( $J$ = 16.2, 12.8 Hz) | 1H        | 8, 13, 14, 1', 2', 3'              | H-14 $\alpha$ , H-17 $\alpha$              | H <sub>3</sub> -15 $\beta$ , H <sub>3</sub> -16 $\beta$ , H-17 $\alpha$      |
|          |                 | 2.80 $\alpha$  | dd ( $J$ = 16.2, 4.9 Hz)  | 1H        | 8, 12, 13, 14, 1', 2', 3'          | H-14 $\alpha$ , H-17 $\beta$               | H-7 $\beta$ , H-14 $\alpha$ , H-17 $\beta$                                   |
| 18       | 15.7 q          | 1.65 $\beta$   | s                         | 3H        | 3, 4, 5, 19                        |                                            | H-2 $\beta$ , H <sub>3</sub> -19 $\alpha$                                    |
| 19       | 28.2 q          | 1.20 $\alpha$  | s                         | 3H        | 3, 4, 5, 18                        |                                            | H-3 $\alpha$ , H-5 $\alpha$ , H <sub>3</sub> -18 $\beta$                     |
| 20       | 177.2 s         |                |                           |           |                                    |                                            |                                                                              |
| 1'       | 162.8 s         |                |                           |           |                                    |                                            |                                                                              |
| 2'       | 98.9 s          |                |                           |           |                                    |                                            |                                                                              |
| 3'       | 179.7 s         |                |                           |           |                                    |                                            |                                                                              |
| 4'       | 112.4 d         | 6.19           | d ( $J$ = 0.7 Hz)         | 1H        | 2', 3', 5', 6'                     |                                            | H <sub>3</sub> -6'                                                           |
| 5'       | 160.9 s         |                |                           |           |                                    |                                            |                                                                              |
| 6'       | 18.8 q          | 2.04           | d ( $J$ = 0.7 Hz)         | 3H        | 4', 5'                             |                                            | H-4'                                                                         |
| 3-OH     |                 | 6.09 $\beta$   | s                         | 1H        |                                    | H-3 $\alpha$                               |                                                                              |
| 12-OH    |                 | 8.08 $\beta$   | s                         | 1H        |                                    | H-12 $\alpha$                              |                                                                              |

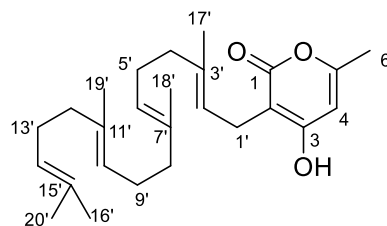

geranylgeranyl-triacetate lactone (**9**)

Table S12. **NMR data for geranylgeranyl-triacetate lactone (**9**)** ( $^1\text{H}$  NMR:600 MHz,  $^{13}\text{C}$  NMR: 150 MHz,  $\delta$  in ppm, recorded in acetone- $d_6$ )

| position | $^{13}\text{C}$<br>$\delta$ (ppm) | $\delta$ (ppm) | Multiplicity      | intensity | $^1\text{H}$<br>HMBC correlation | COSY correlation          |
|----------|-----------------------------------|----------------|-------------------|-----------|----------------------------------|---------------------------|
| 1        | 165.7 s                           |                |                   |           |                                  |                           |
| 2        | 102.4 s                           |                |                   |           |                                  |                           |
| 3        | 165.4 s                           |                |                   |           |                                  |                           |
| 4        | 100.8 d                           | 5.98           | s                 | 1H        | 2, 3, 5, 6                       |                           |
| 5        | 160.7 s                           |                |                   |           |                                  |                           |
| 6        | 19.6 q                            | 2.04           | s                 | 3H        | 4, 5                             |                           |
| 1'       | 22.7 t                            | 3.09           | d ( $J = 7.0$ Hz) | 2H        | 1, 2, 3, 2', 3'                  | H-2'                      |
| 2'       | 122.6 d                           | 5.23           | t ( $J = 7.0$ Hz) | 1H        | 1', 4', 17'                      | H <sub>2</sub> -1'        |
| 3'       | 135.3 s                           |                |                   |           |                                  |                           |
| 4'       | 40.4 t                            | 1.93           | overlap           | 2H        | 2', 3', 5', 6', 17'              | H <sub>2</sub> -5'        |
| 5'       | 27.2 t                            | 2.05           | overlap           | 2H        | 3', 4', 6', 7'                   | H <sub>2</sub> -4', H-6'  |
| 6'       | 125.1 d                           | 5.12           | overlap           | 1H        | 4', 5', 8', 18'                  | H <sub>2</sub> -5'        |
| 7'       | 135.6 s                           |                |                   |           |                                  |                           |
| 8'       | 40.4 t                            | 2.04           | overlap           | 2H        | 6', 7', 9', 10'                  | H <sub>2</sub> -9'        |
| 9'       | 27.2 t                            | 1.93           | overlap           | 2H        | 7', 8', 10', 11'                 | H <sub>2</sub> -8', H-10' |
| 10'      | 125.1 d                           | 5.12           | overlap           | 1H        | 8', 9', 12', 19'                 | H <sub>2</sub> -9'        |
| 11'      | 135.4 s                           |                |                   |           |                                  |                           |
| 12'      | 40.5 t                            | 2.04a          | overlap           | 1H        | 10', 11', 13', 14'               | H-12'b, H-13'a, H-13'b    |
|          |                                   | 1.93b          | overlap           | 1H        | 10', 11', 13', 14', 19'          | H-12'a, H-13'a, H-13'b    |
| 13'      | 27.4 t                            | 2.04a          | overlap           | 1H        | 11', 12', 14'                    | H-12'a, H-13'b, H-14'     |
|          |                                   | 1.93b          | overlap           | 1H        | 11', 12', 15                     | H-12'b, H-13'a            |
| 14'      | 125.0 d                           | 5.12           | overlap           | 1H        | 12', 16', 20'                    | H-13'a                    |
| 15'      | 131.5 s                           |                |                   |           |                                  |                           |
| 16'      | 17.7 q                            | 1.74           | s                 | 3H        | 20'                              |                           |
| 17'      | 16.1 q                            | 1.59           | s                 | 3H        | 2', 3', 4'                       |                           |
| 18'      | 16.1 q                            | 1.59           | s                 | 3H        | 6', 7', 8'                       |                           |
| 19'      | 16.3 q                            | 1.59           | s                 | 3H        | 10', 11', 12'                    |                           |
| 20'      | 25.8 q                            | 1.65           | s                 | 3H        | 16'                              |                           |



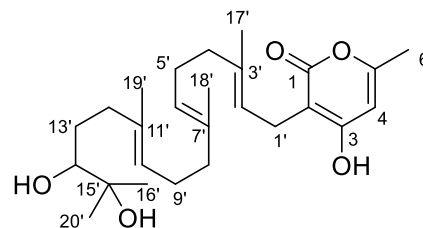

dihydroxygeranylgeranyl-triacetate lactone (**10**)

Table S13. **NMR data for dihydroxygeranylgeranyl-triacetate lactone (**10**)** ( $^1\text{H}$  NMR:600 MHz,  $^{13}\text{C}$  NMR: 150 MHz,  $\delta$  in ppm, recorded in acetone- $d_6$ )

| position | $^{13}\text{C}$ | $^1\text{H}$   |                    |           |                         |                                  |
|----------|-----------------|----------------|--------------------|-----------|-------------------------|----------------------------------|
|          | $\delta$ (ppm)  | $\delta$ (ppm) | Multiplicity       | intensity | HMBC correlation        | COSY correlation                 |
| 1        | 171.0 s         |                |                    |           |                         |                                  |
| 2        | 100.5 s         |                |                    |           |                         |                                  |
| 3        | 167.0 s         |                |                    |           |                         |                                  |
| 4        | 103.6 d         | 5.98           | s                  | 1H        | 2, 5, 6                 |                                  |
| 5        | 159.0 s         |                |                    |           |                         |                                  |
| 6        | 19.7 q          | 2.04           | s                  | 3H        | 4, 5                    |                                  |
| 1'       | 23.0 t          | 3.06           | d ( $J = 7.0$ Hz)  | 2H        | 1, 2, 3, 2', 3'         | H-2'                             |
| 2'       | 124.4 d         | 5.28           | t ( $J = 7.0$ Hz)  | 1H        | 1', 4', 17'             | H <sub>2</sub> -1'               |
| 3'       | 134.0 s         |                |                    |           |                         |                                  |
| 4'       | 40.4 t          | 2.06           | overlap            | 2H        | 2', 3', 5', 6'          | H <sub>2</sub> -5'               |
| 5'       | 27.2 t          | 2.07           | overlap            | 2H        | 3', 4', 6', 7'          | H <sub>2</sub> -4', H-6'         |
| 6'       | 125.2 d         | 5.12           | overlap            | 1H        | 4', 5', 8', 18'         | H <sub>2</sub> -5'               |
| 7'       | 135.1 s         |                |                    |           |                         |                                  |
| 8'       | 40.6 t          | 1.93           | overlap            | 2H        | 6', 7', 9', 10'         | H <sub>2</sub> -9'               |
| 9'       | 27.3 t          | 1.93           | overlap            | 2H        | 7', 10', 11'            | H <sub>2</sub> -8', H-10' (weak) |
| 10'      | 124.9 d         | 5.12           | overlap            | 1H        | 9', 12', 19'            | H <sub>2</sub> -9' (weak)        |
| 11'      | 135.8 s         |                |                    |           |                         |                                  |
| 12'      | 37.6 t          | 2.24a          | m                  | 1H        | 10', 11', 13', 14', 19' | H-12'b, H-13'a                   |
| 13'      | 30.8 t          | 1.99b          | overlap            | 1H        | 10', 11', 13', 19'      | H-12'a, H-13'a                   |
|          |                 | 1.64a          | overlap            | 1H        |                         | H-12'a, H-13'b                   |
|          |                 | 1.33b          | overlap            | 1H        | 14'                     | H-12'b, H-13'a, H-14'            |
| 14'      | 78.5 d          | 3.25           | d ( $J = 10.4$ Hz) | 1H        | 12', 13', 15', 16', 20' | H-13'a                           |
| 15'      | 72.8 s          |                |                    |           |                         |                                  |
| 16'      | 25.0 q          | 1.10           | s                  | 3H        | 14', 15', 20'           |                                  |
| 17'      | 16.1 q          | 1.73           | s                  | 3H        | 2', 3', 4'              |                                  |
| 18'      | 16.4 q          | 1.57           | s                  | 3H        | 6', 7', 8'              |                                  |
| 19'      | 16.2 q          | 1.58           | s                  | 3H        | 10', 11', 12'           |                                  |
| 20'      | 26.0 q          | 1.11           | s                  | 3H        | 14', 15', 16'           |                                  |

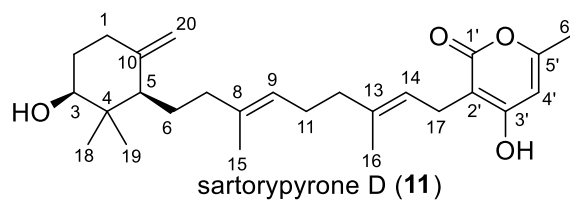

Table S14.  $^{13}\text{C}$  NMR data for sartorypyrone D (11)

| position | 200 MHz<br>$\text{CD}_3\text{OD}$ | 100 MHz <sup>a</sup><br>$\text{CD}_3\text{Cl}$ |
|----------|-----------------------------------|------------------------------------------------|
| 1        | 34.8 t                            | 32.4 t                                         |
| 2        | 33.2 t                            | 32.0 t                                         |
| 3        | 78.0 d                            | 77.3 d                                         |
| 4        | 41.6 s                            | 40.4 s                                         |
| 5        | 52.0 d                            | 51.2 d                                         |
| 6        | 24.6 t                            | 23.9 t                                         |
| 7        | 40.9 t                            | 38.6 t                                         |
| 8        | 136.3 s                           | 136.3 s                                        |
| 9        | 125.4 d                           | 123.2 d                                        |
| 10       | 149.0 s                           | 147.3 s                                        |
| 11       | 27.5 t                            | 26.0 t                                         |
| 12       | 39.6 t                            | 39.6 t                                         |
| 13       | 136.5 s                           | 140.6 s                                        |
| 14       | 122.5 d                           | 120.4 d                                        |
| 15       | 16.1 q                            | 16.2 q                                         |
| 16       | 16.3 q                            | 16.3 q                                         |
| 17       | 22.8 t                            | 22.9 t                                         |
| 18       | 15.7 q                            | 16.2 q                                         |
| 19       | 26.4 q                            | 26.1 q                                         |
| 20       | 108.5 t                           | 108.5 t                                        |
| 1'       | 168.6 s                           | 165.9 s                                        |
| 2'       | 103.1 s                           | 100.7 s                                        |
| 3'       | 167.5 s                           | 165.8 s                                        |
| 4'       | 101.6 d                           | 100.7 d                                        |
| 5'       | 161.6 s                           | 160.3 s                                        |
| 6'       | 19.6 q                            | 19.7 q                                         |

(<sup>a</sup>  $\delta$  in ppm, data reported in *The Journal of Antibiotics*, 68, 403–405 (2015))

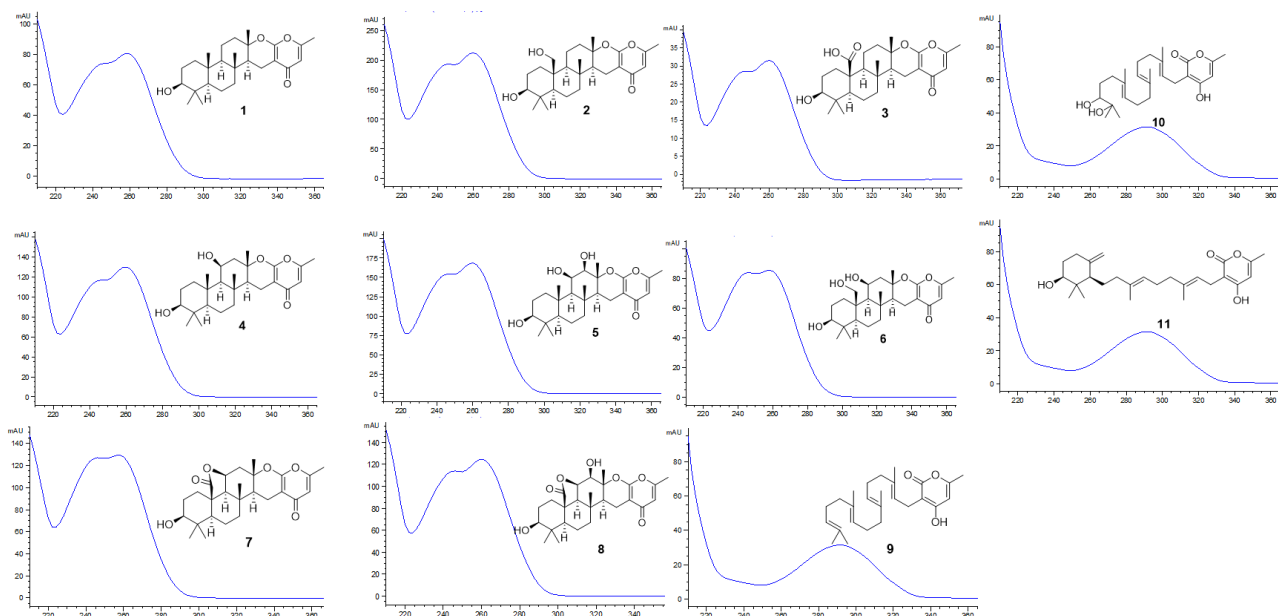

**Figure S1.** UV spectra of secondary metabolites isolated in this study.

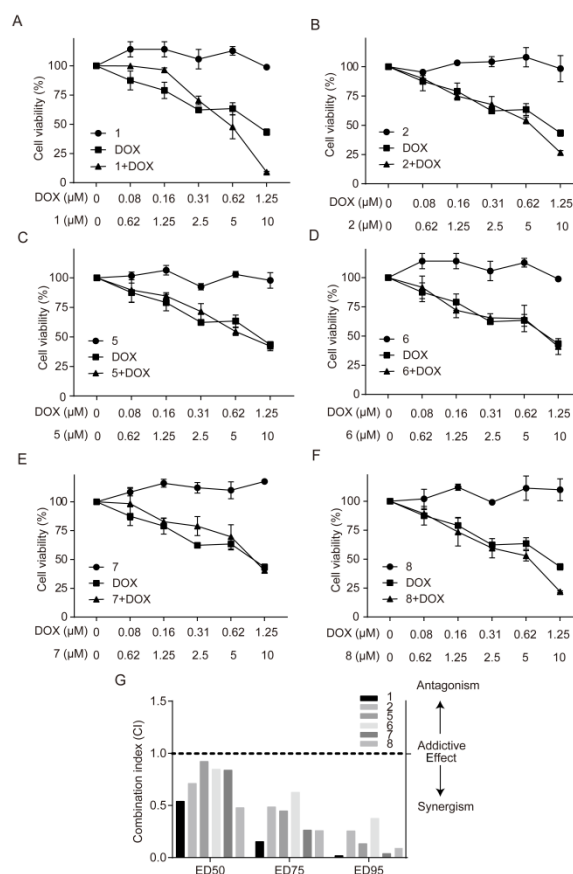

**Figure S2.** Compounds **1**, **2**, **5-8** synergistically enhances cytotoxicity of DOX in MCF-7 breast cancer cells. (A–F) MCF-7 cells were treated with DOX, compounds **1**, **2**, **5-8**, or the combination of both agents at a 1 : 8 M ratio. After 48 h, cell viability was determined using the colorimetric MTT assay. (G) Combination index values were calculated using CompuSyn software to determine drug interaction. A CI < 1 indicates synergism, CI = 1 indicates additive effects, and CI > 1 indicates antagonism. The data are presented as mean  $\pm$  standard deviation of three independent experiments.

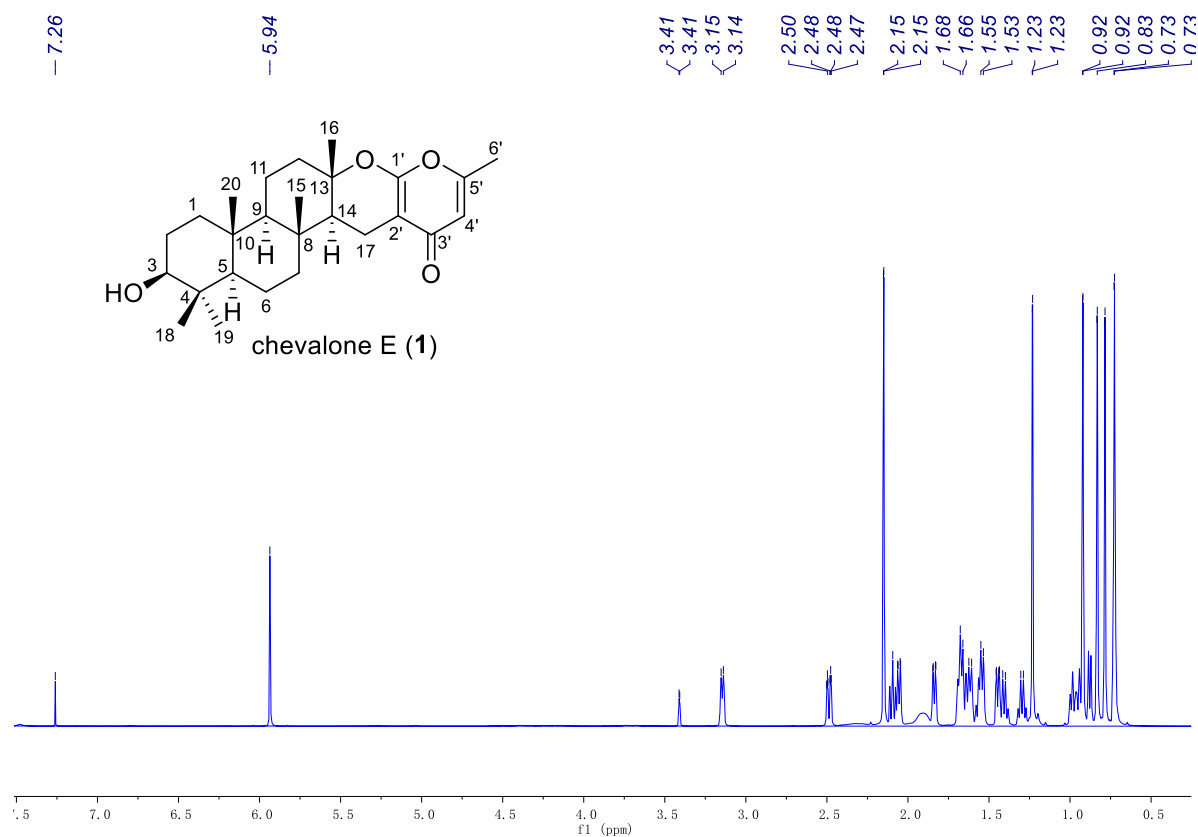

**Figure S3.**  $^1\text{H}$  NMR spectrum of chevalone E (1)

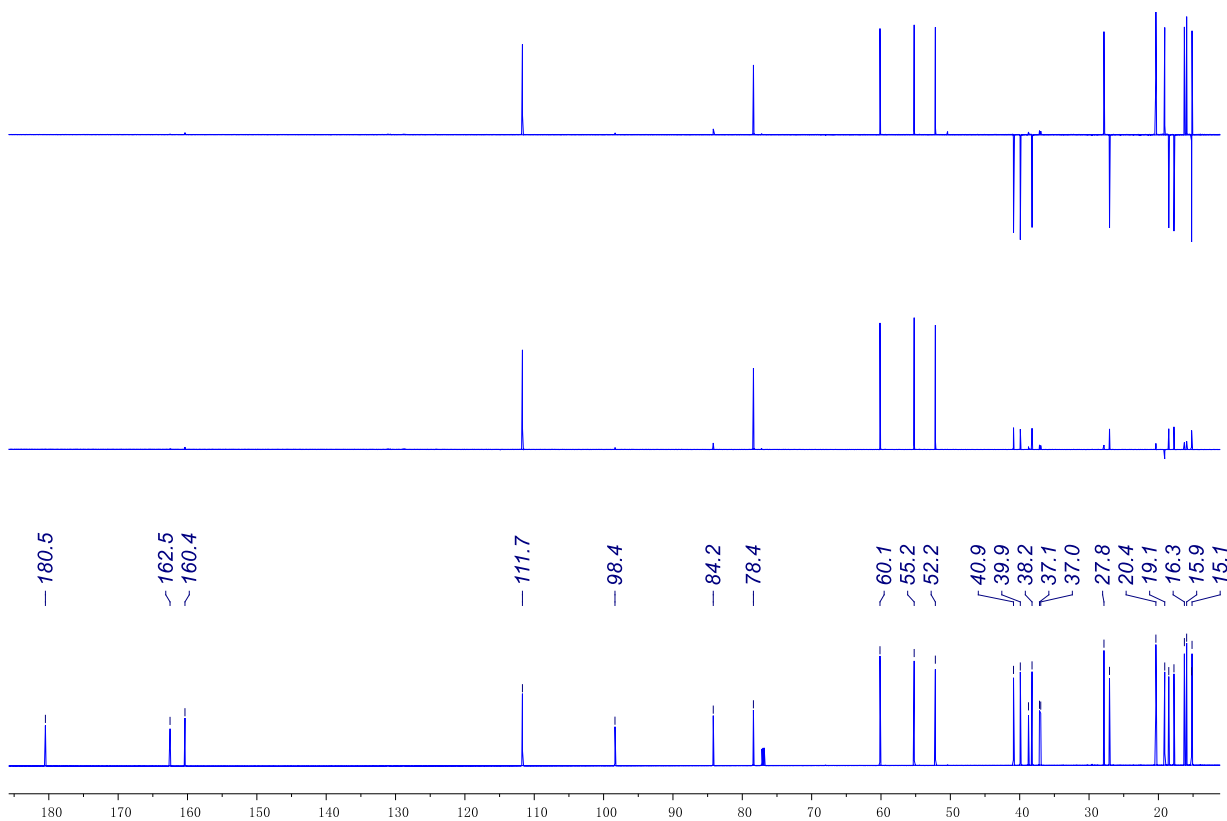

**Figure S4.**  $^{13}\text{C}$  NMR spectrum of chevalone E (1)

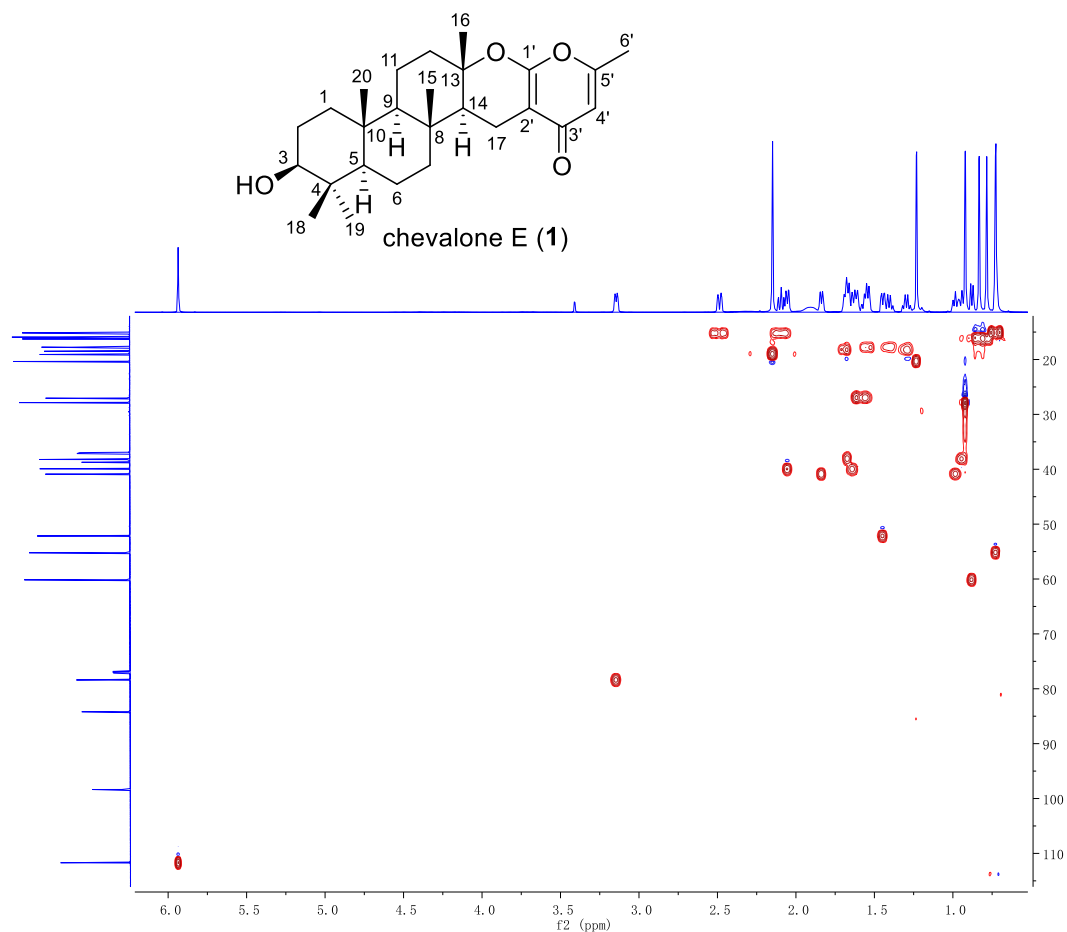

**Figure S5.** HSQC spectrum of chevalone E (1)

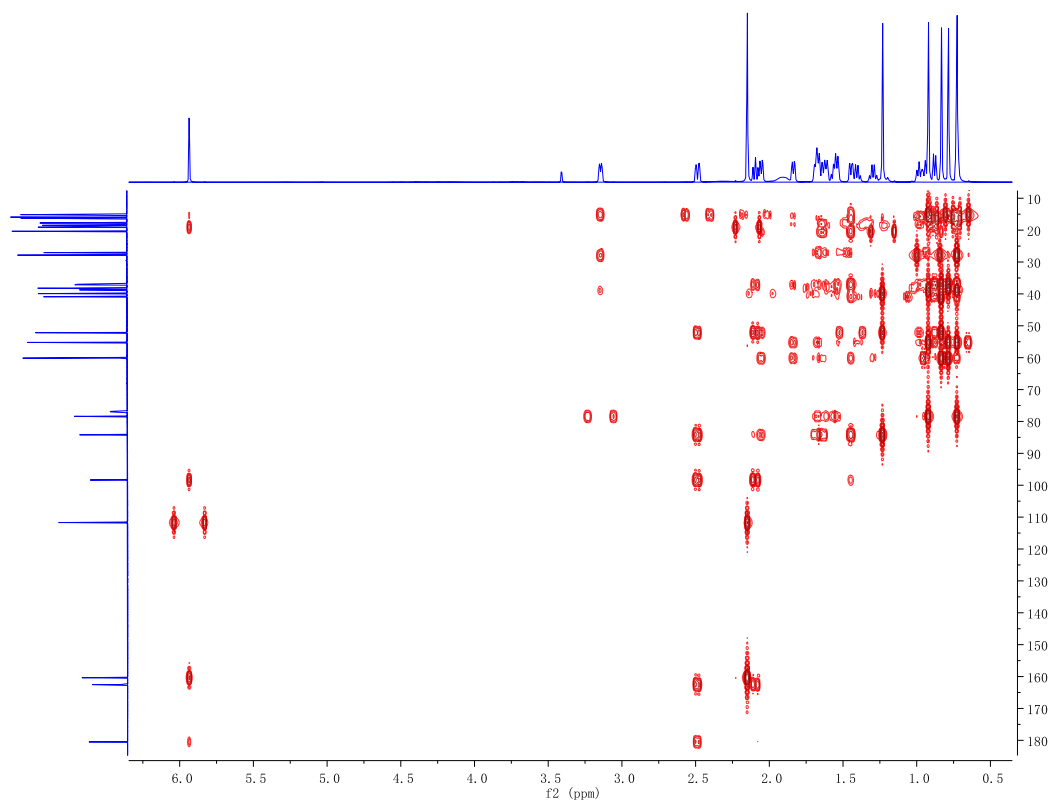

**Figure S6.** HMBC spectrum of chevalone E (1)

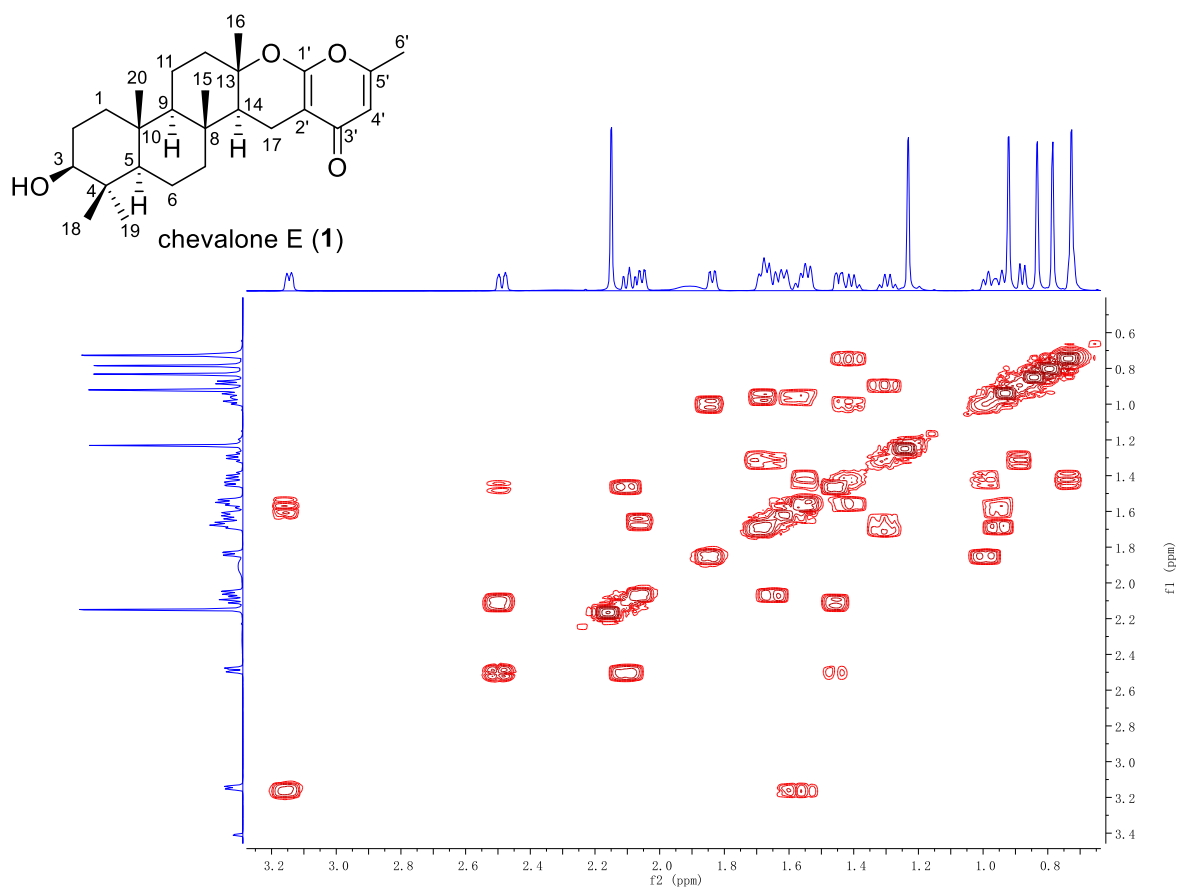

**Figure S7.**  $^1\text{H}$ - $^1\text{H}$  COSY spectrum of chevalone E (1)

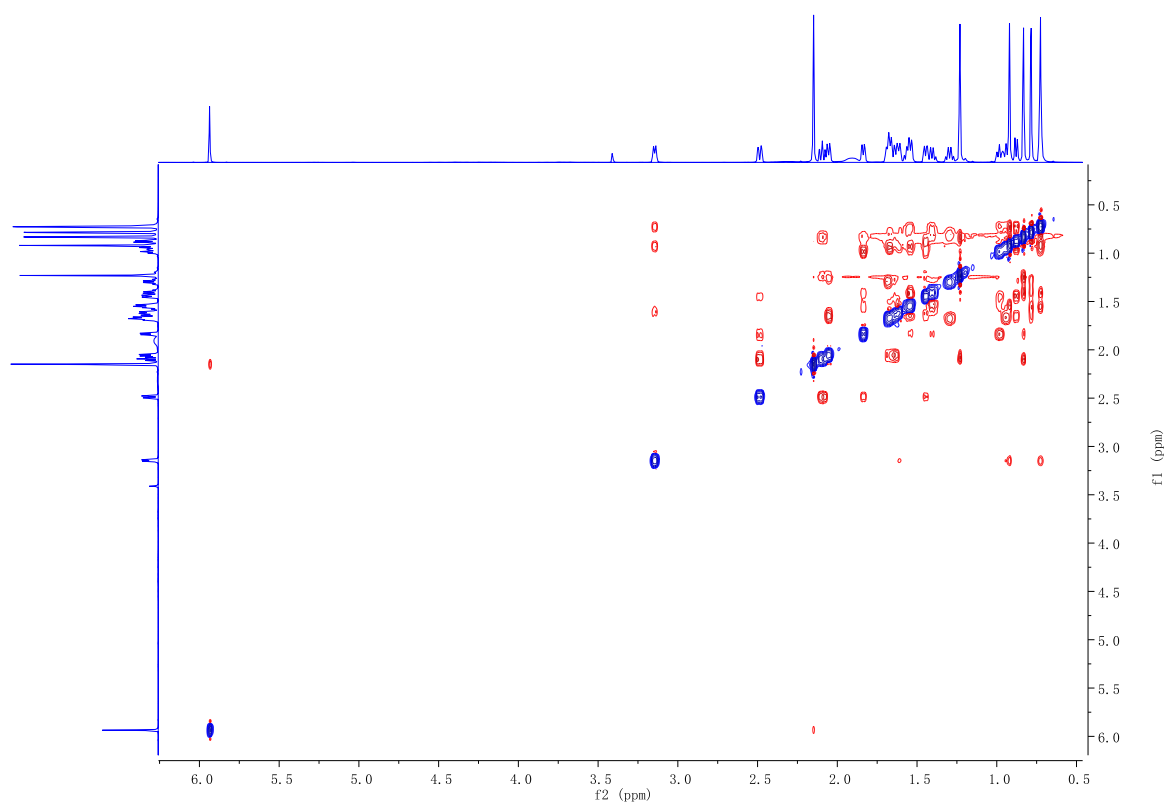

**Figure S8.** ROESY spectrum of chevalone E (1)

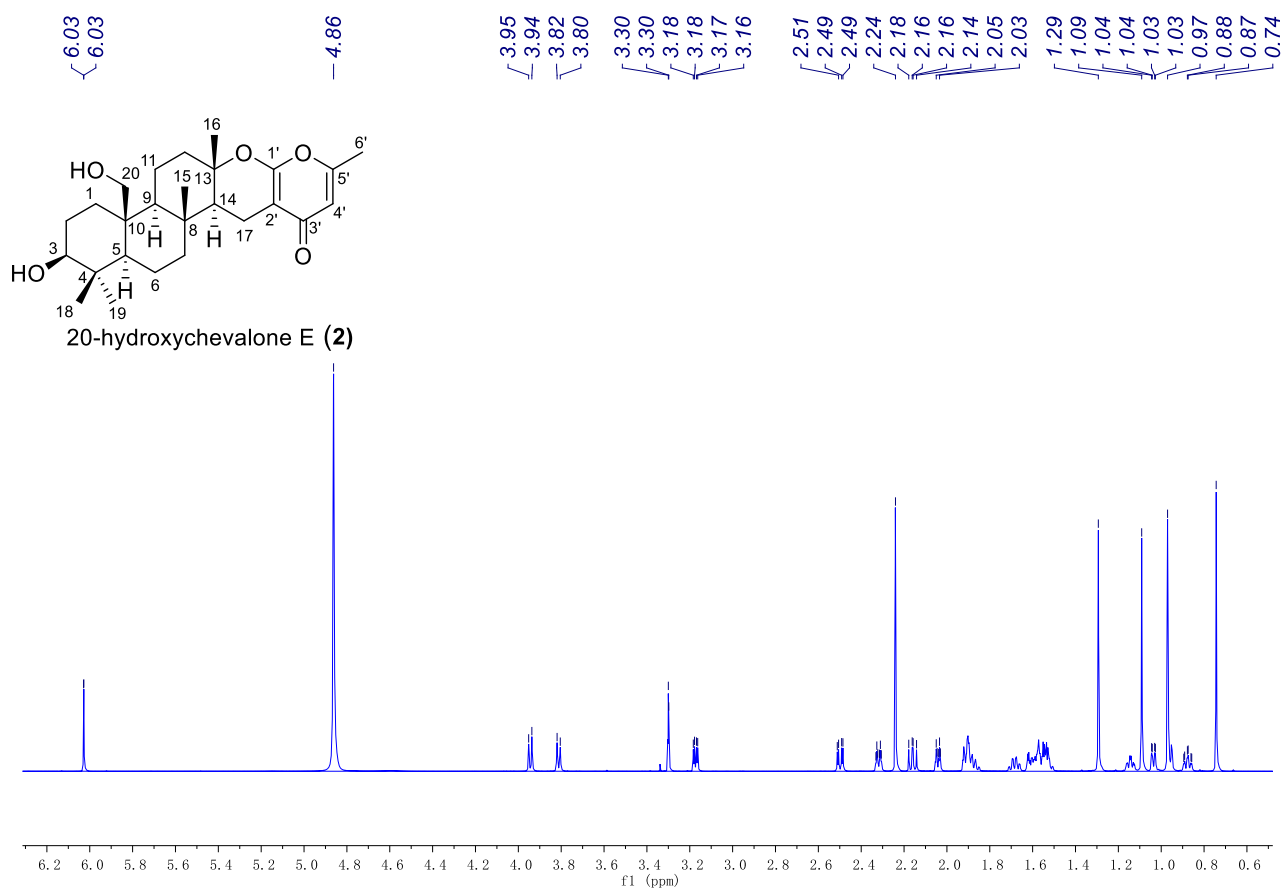

**Figure S9.**  $^1\text{H}$  NMR spectrum of 20-hydroxychevalone E (2)

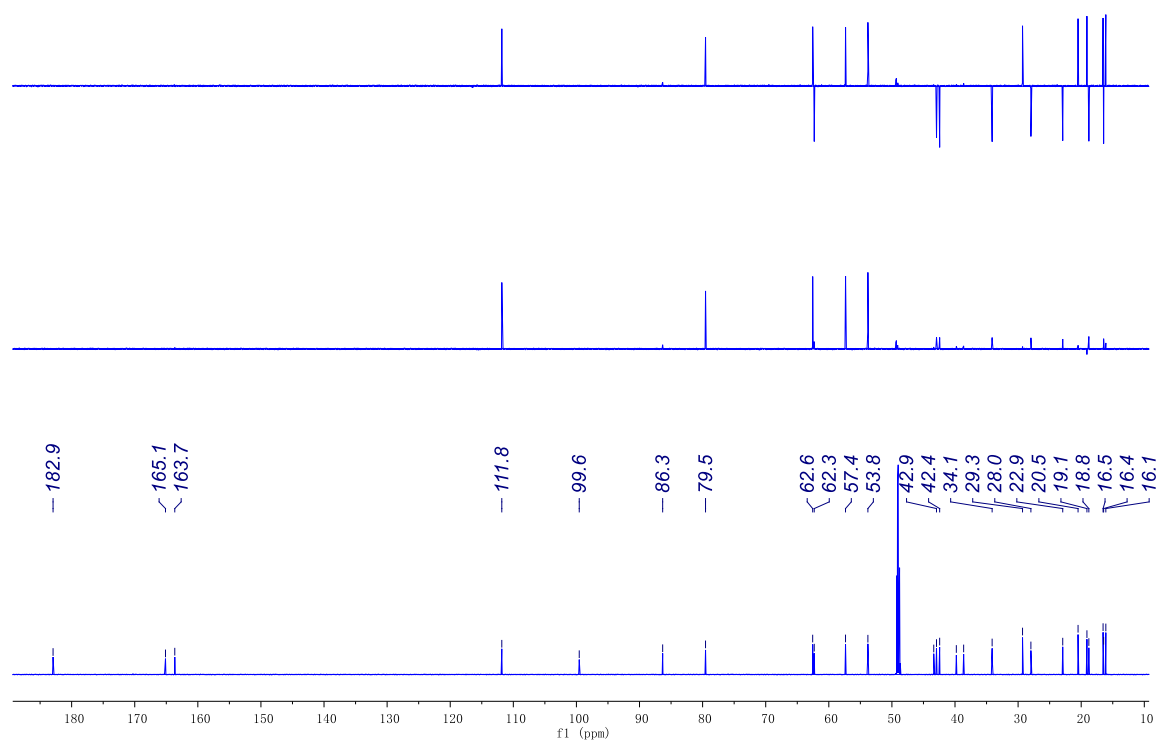

**Figure S10.**  $^{13}\text{C}$  NMR spectrum of 20-hydroxychevalone E (2)



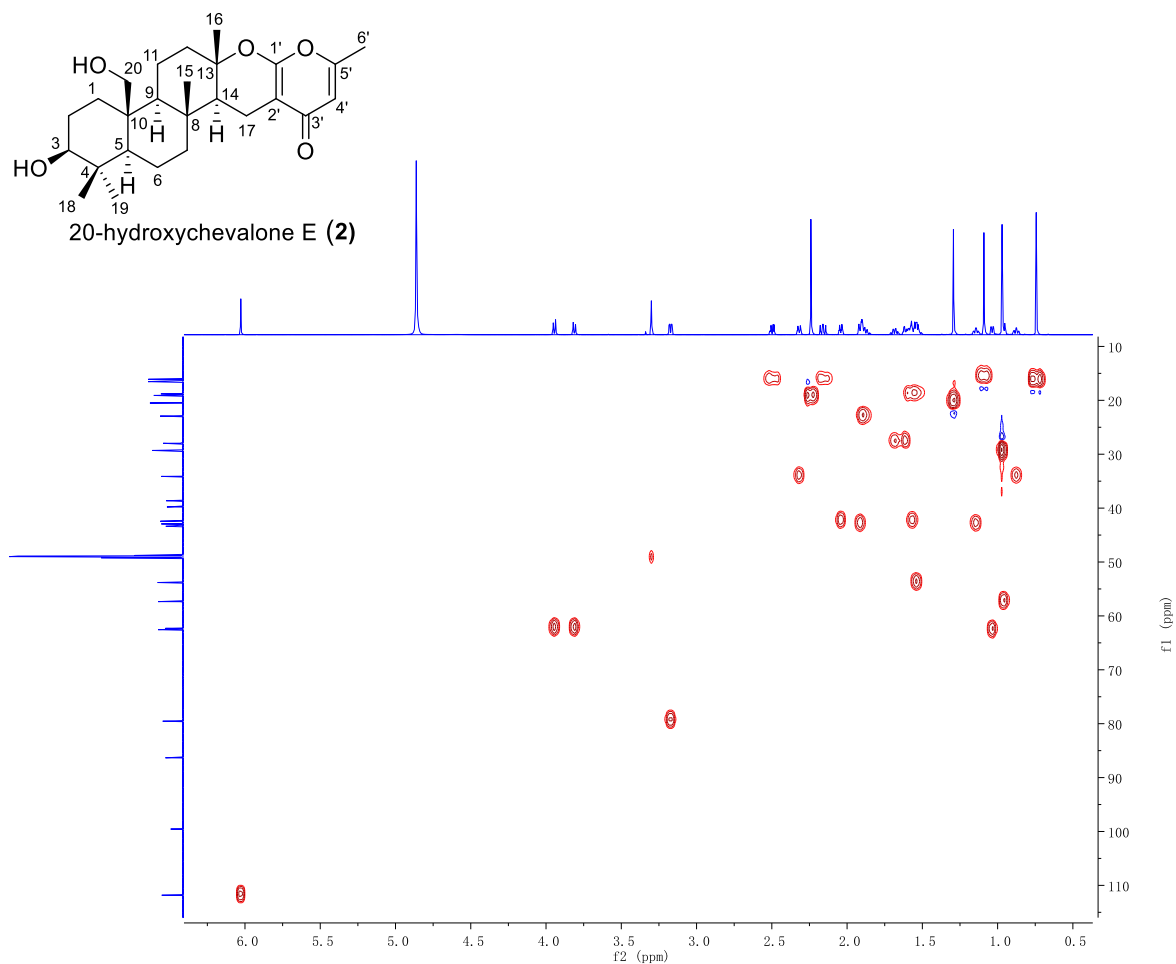

**Figure S11.** HSQC spectrum of 20-hydroxychevalone E (2)

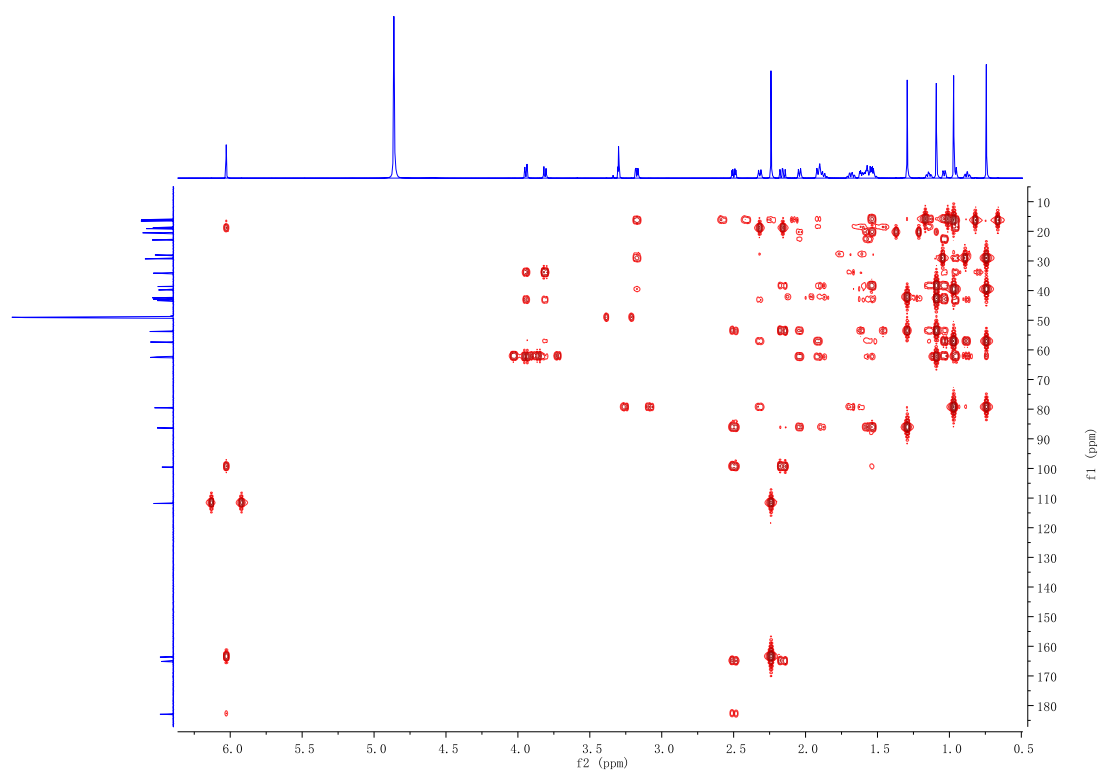

**Figure S12.** HMBC spectrum of 20-hydroxychevalone E (2)

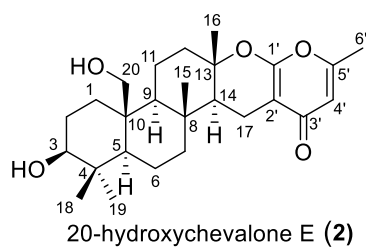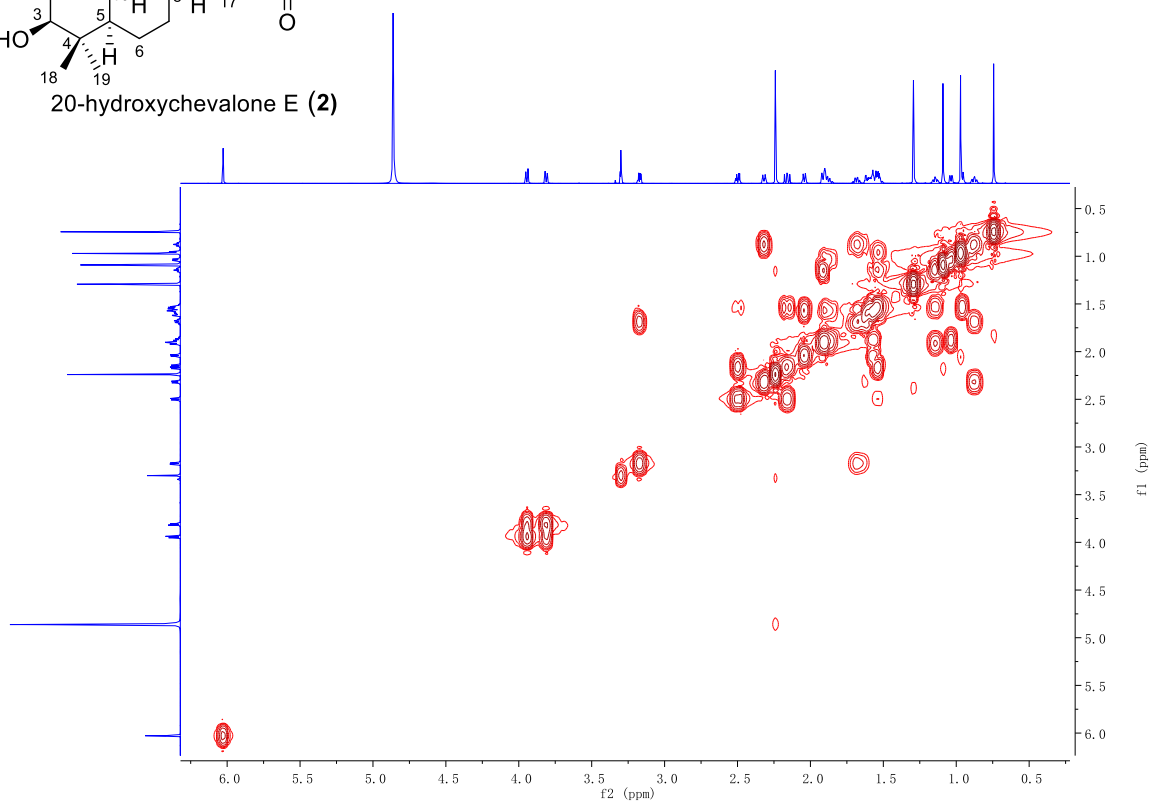

**Figure S13.**  $^1\text{H}$ - $^1\text{H}$  COSY spectrum of 20-hydroxychevalone E (2)

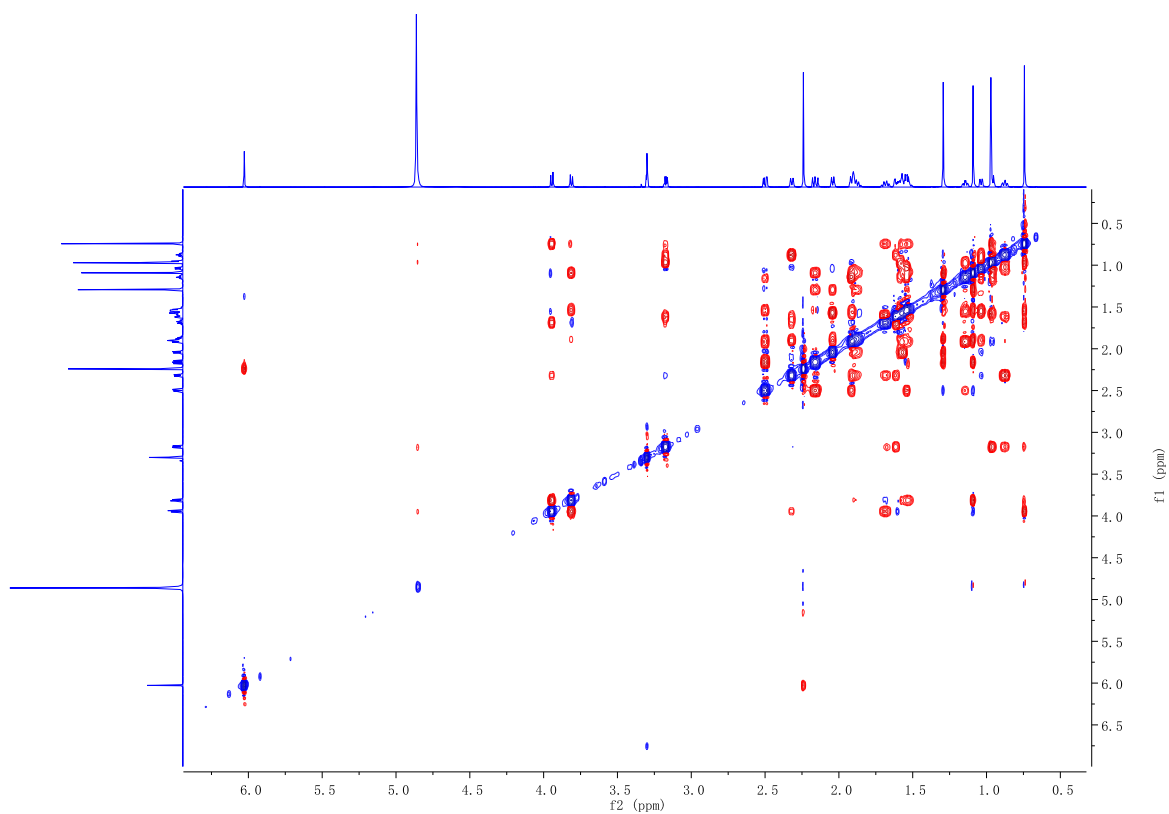

**Figure S14.** ROESY spectrum of 20-hydroxychevalone E (2)



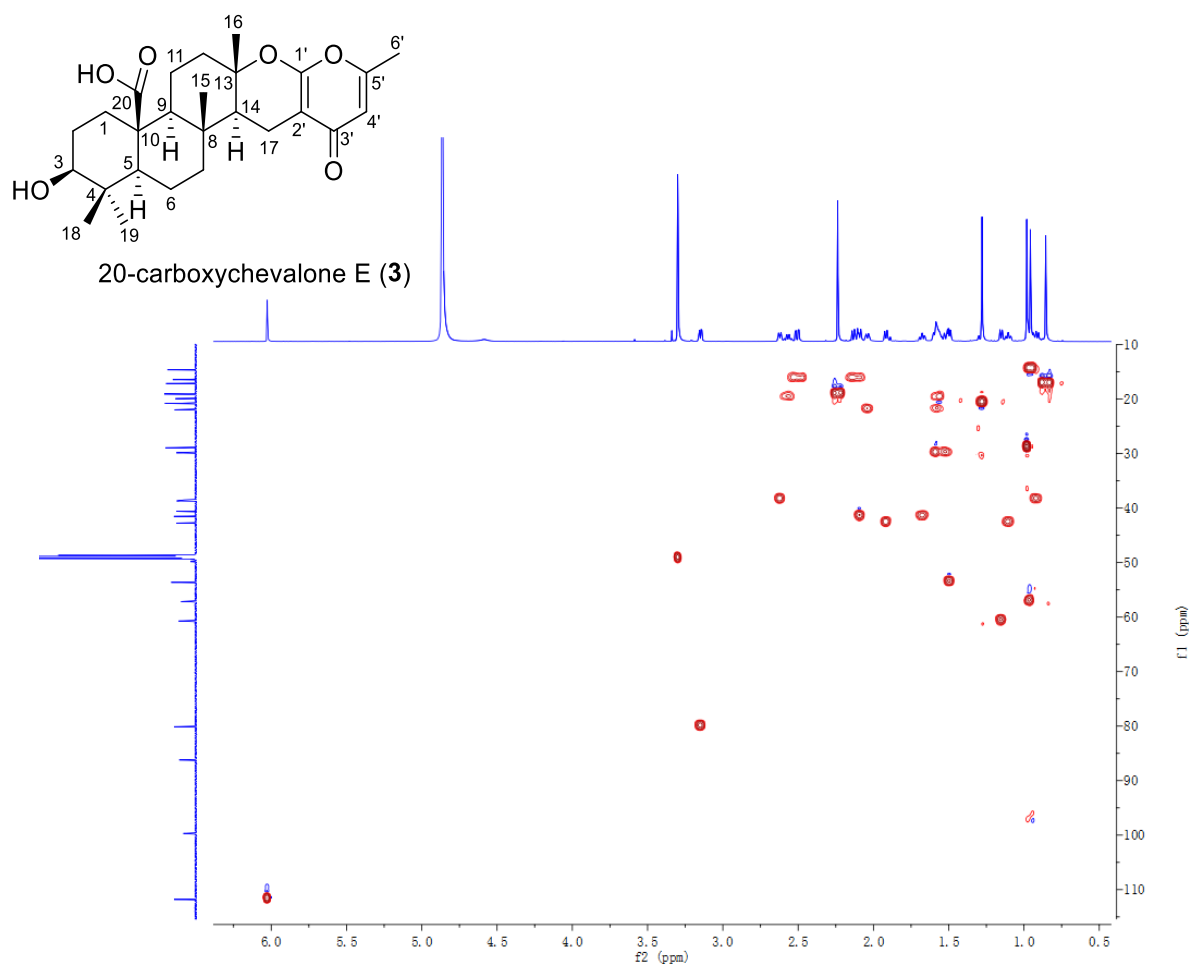

**Figure S17.** HSQC spectrum of 20-carboxychevalone E (**3**)

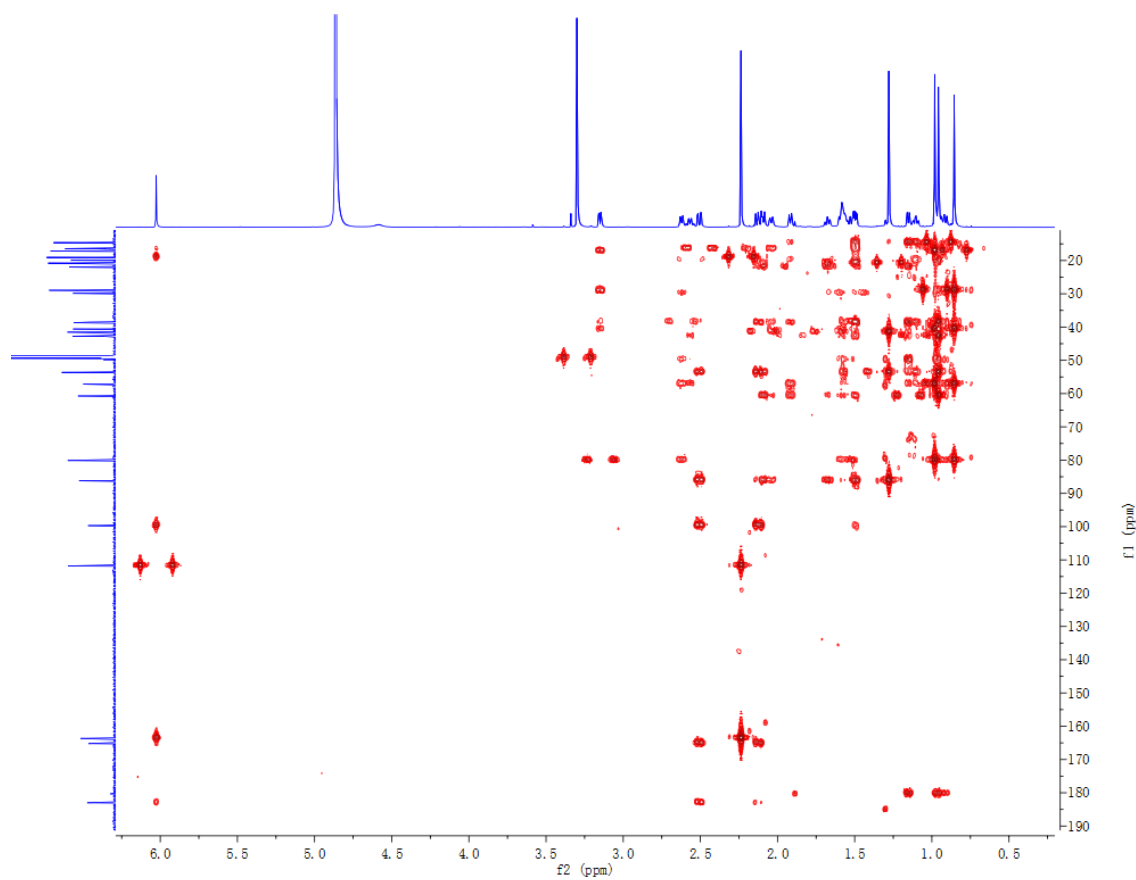

**Figure S18.** HMBC spectrum of 20-carboxychevalone E (**3**)

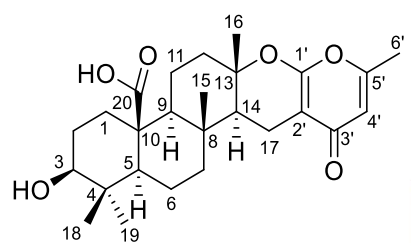

20-carboxychevalone E (**3**)

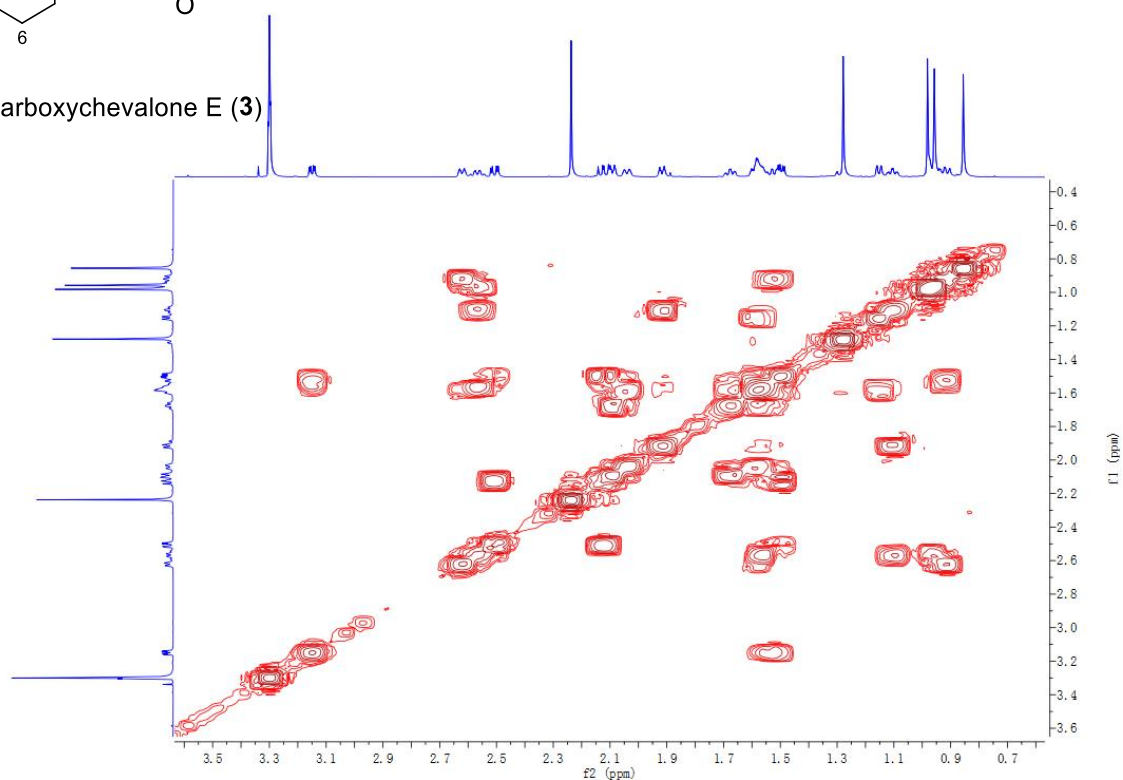

**Figure S19.**  $^1\text{H}$ - $^1\text{H}$  COSY spectrum of 20-carboxychevalone E (**3**)

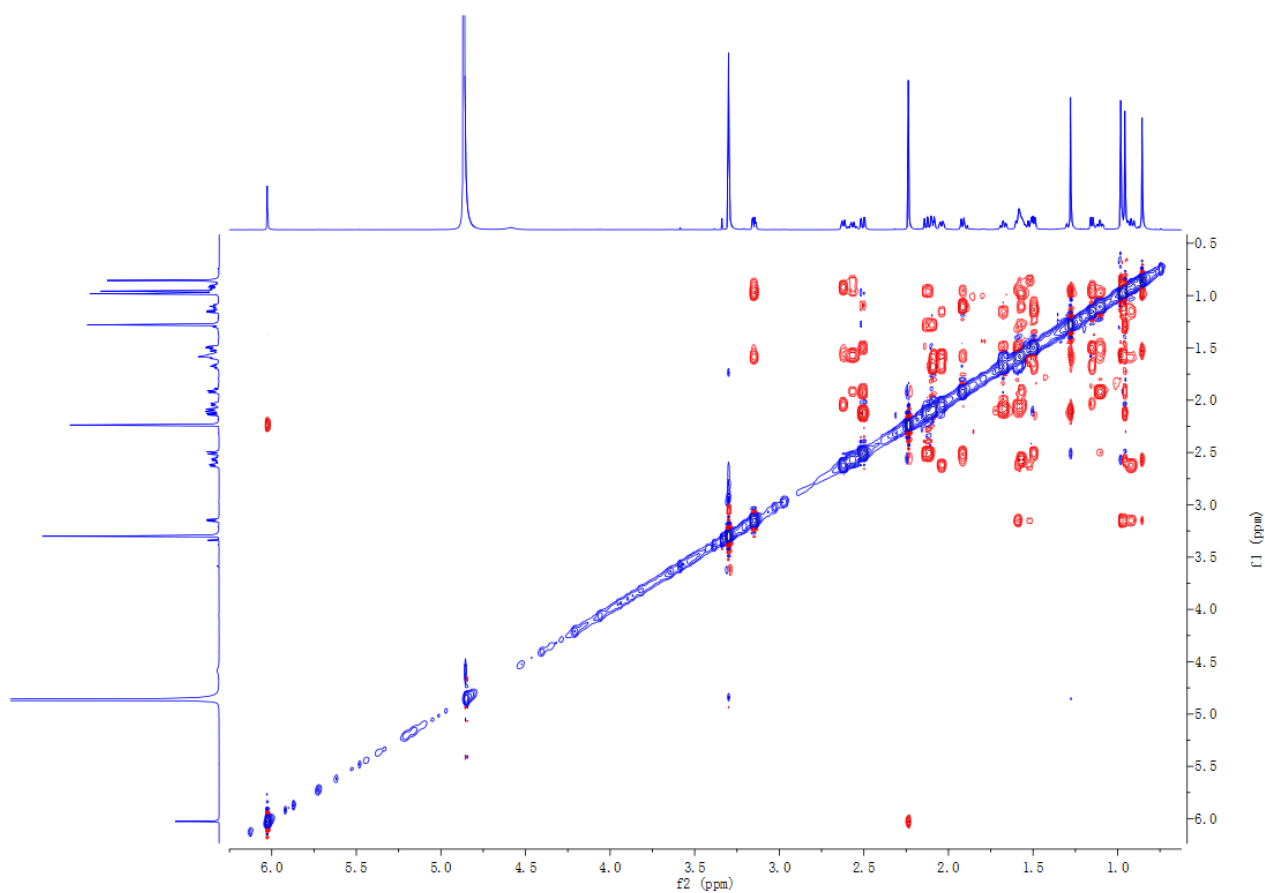

**Figure S20.** ROESY spectrum of 20-carboxychevalone E (**3**)

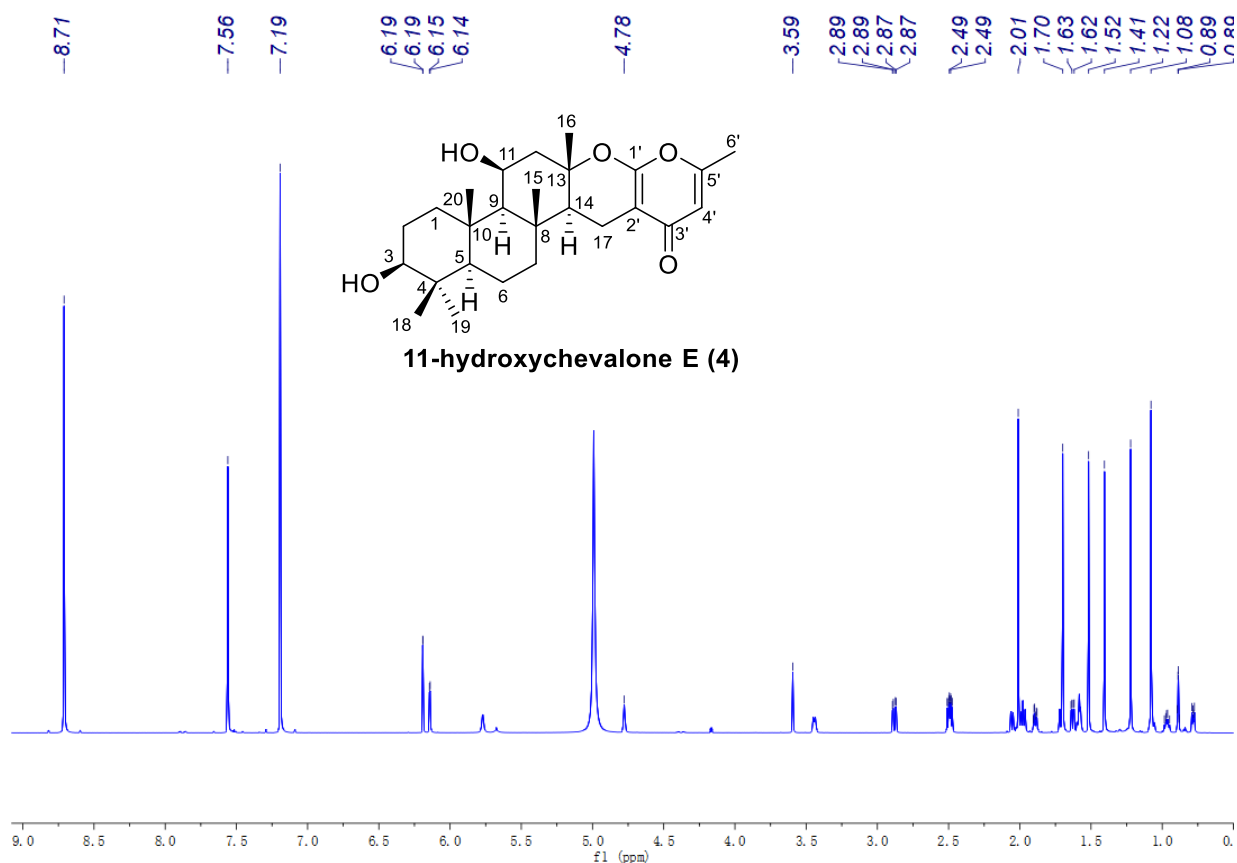

**Figure S21.** <sup>1</sup>H NMR spectrum of 11-hydroxychevalone E (4)

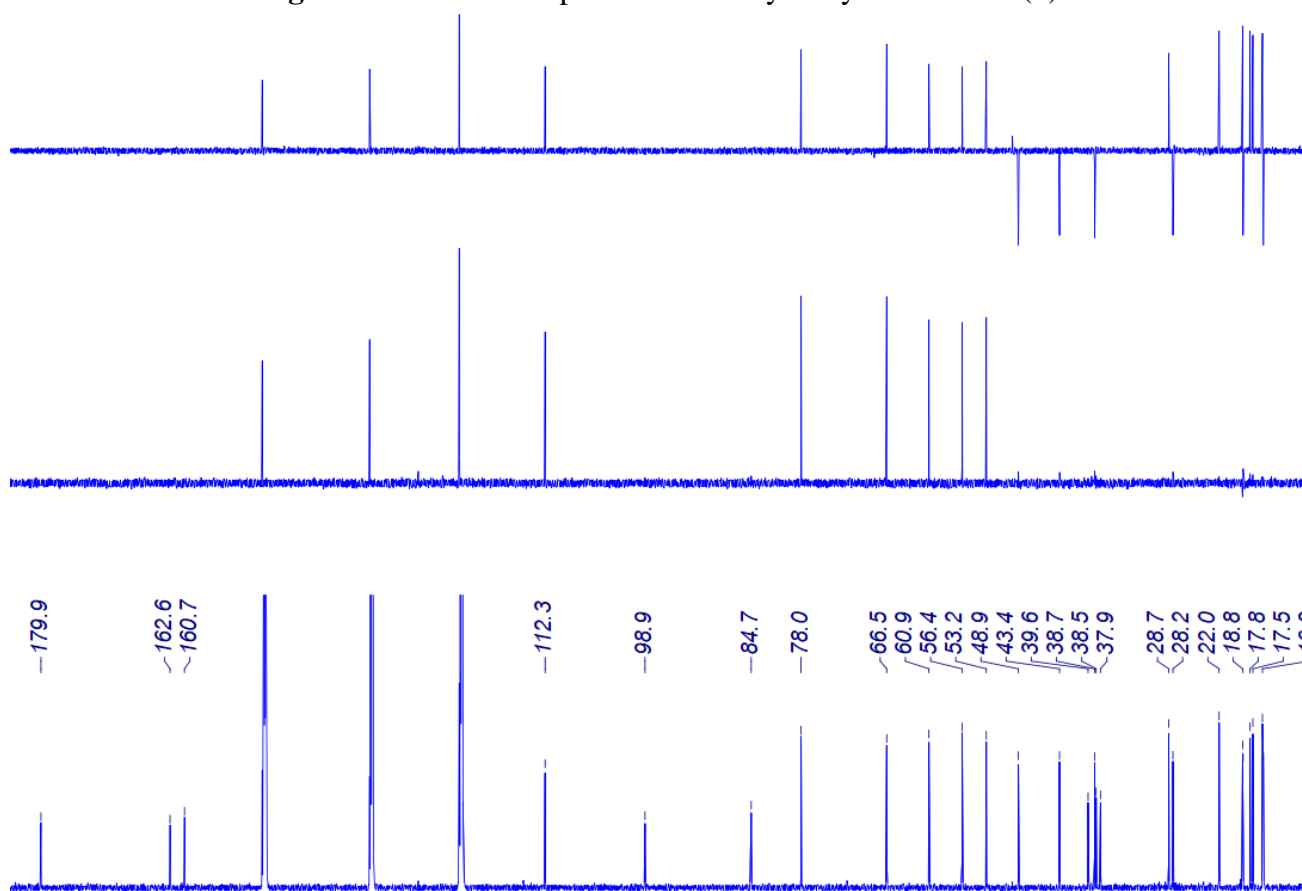

**Figure S22.** <sup>13</sup>C NMR spectrum of 11-hydroxychevalone E (4)

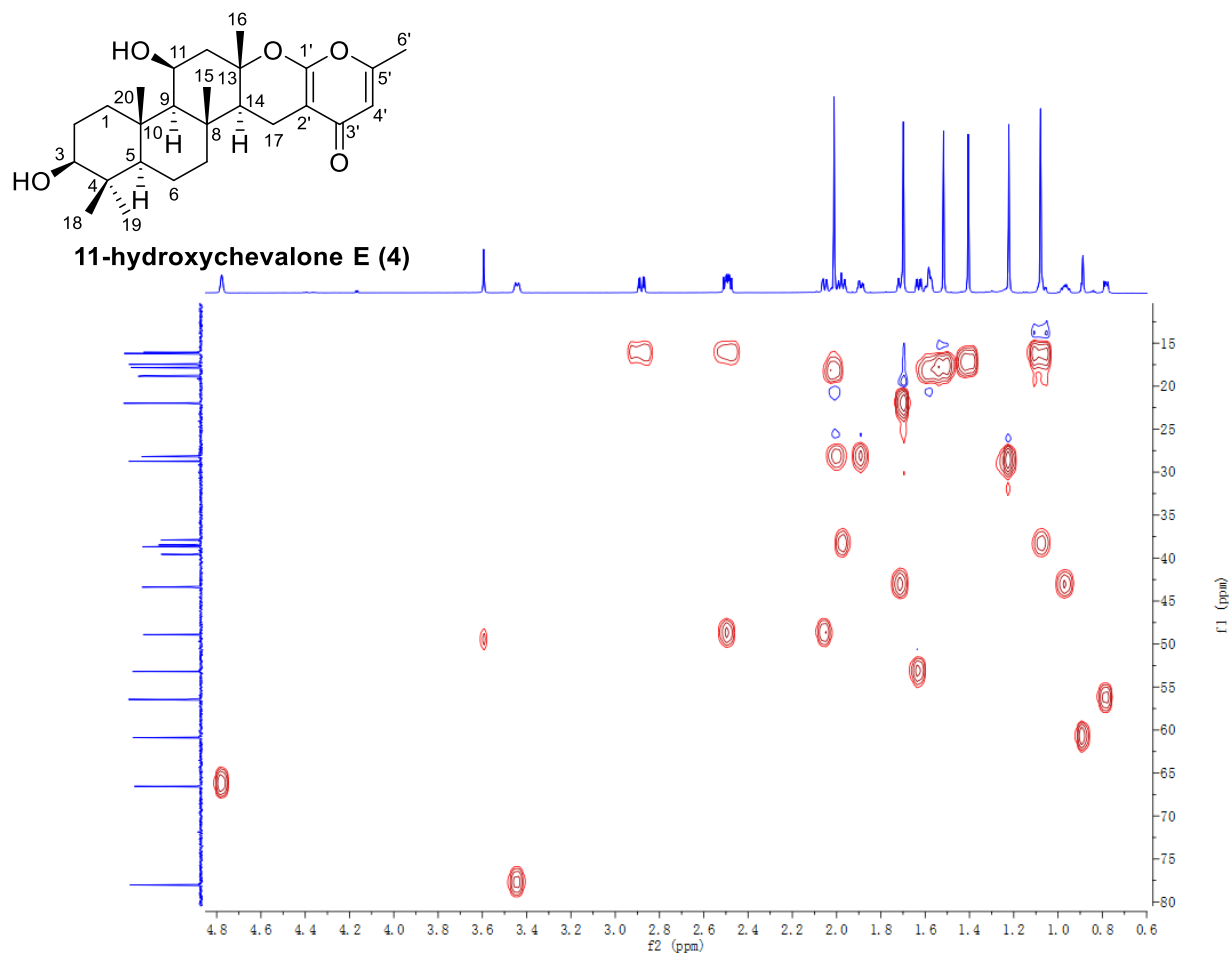

**Figure S23.** HSQC spectrum of 11-hydroxychevalone E (4)

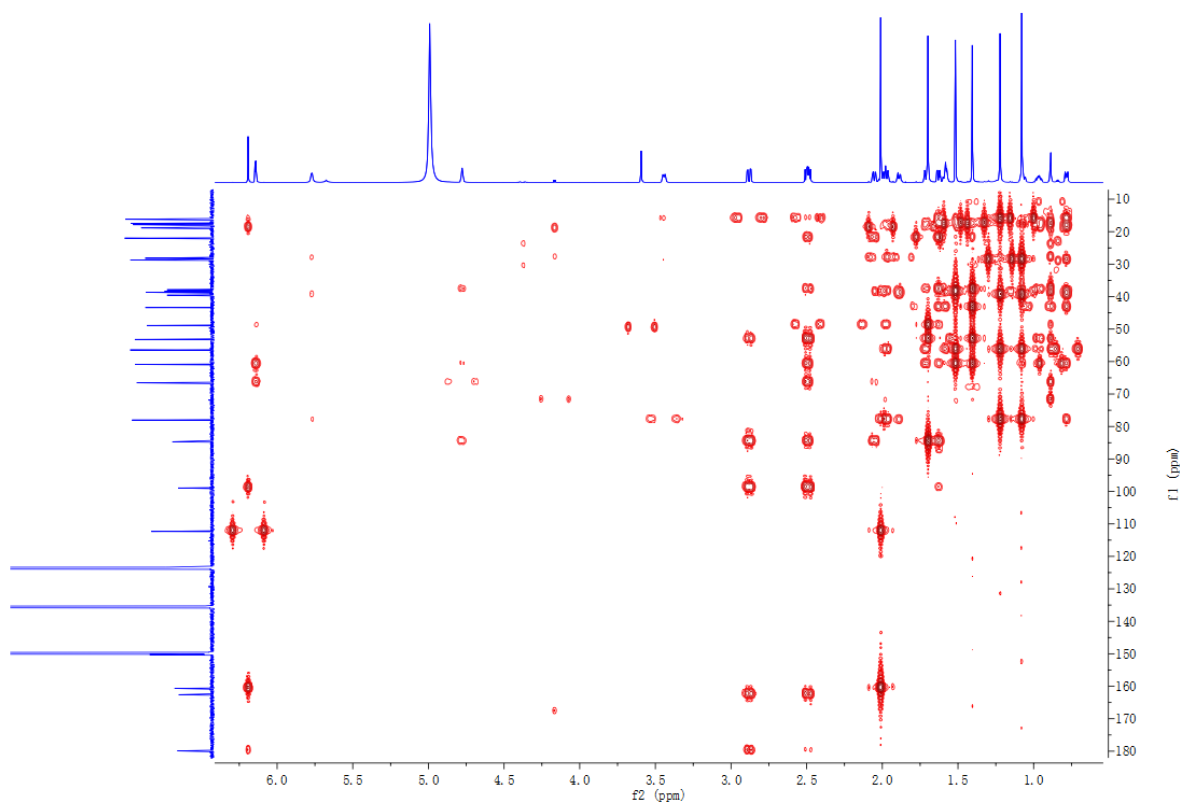

**Figure S24.** HMBC spectrum of 11-hydroxychevalone E (4)

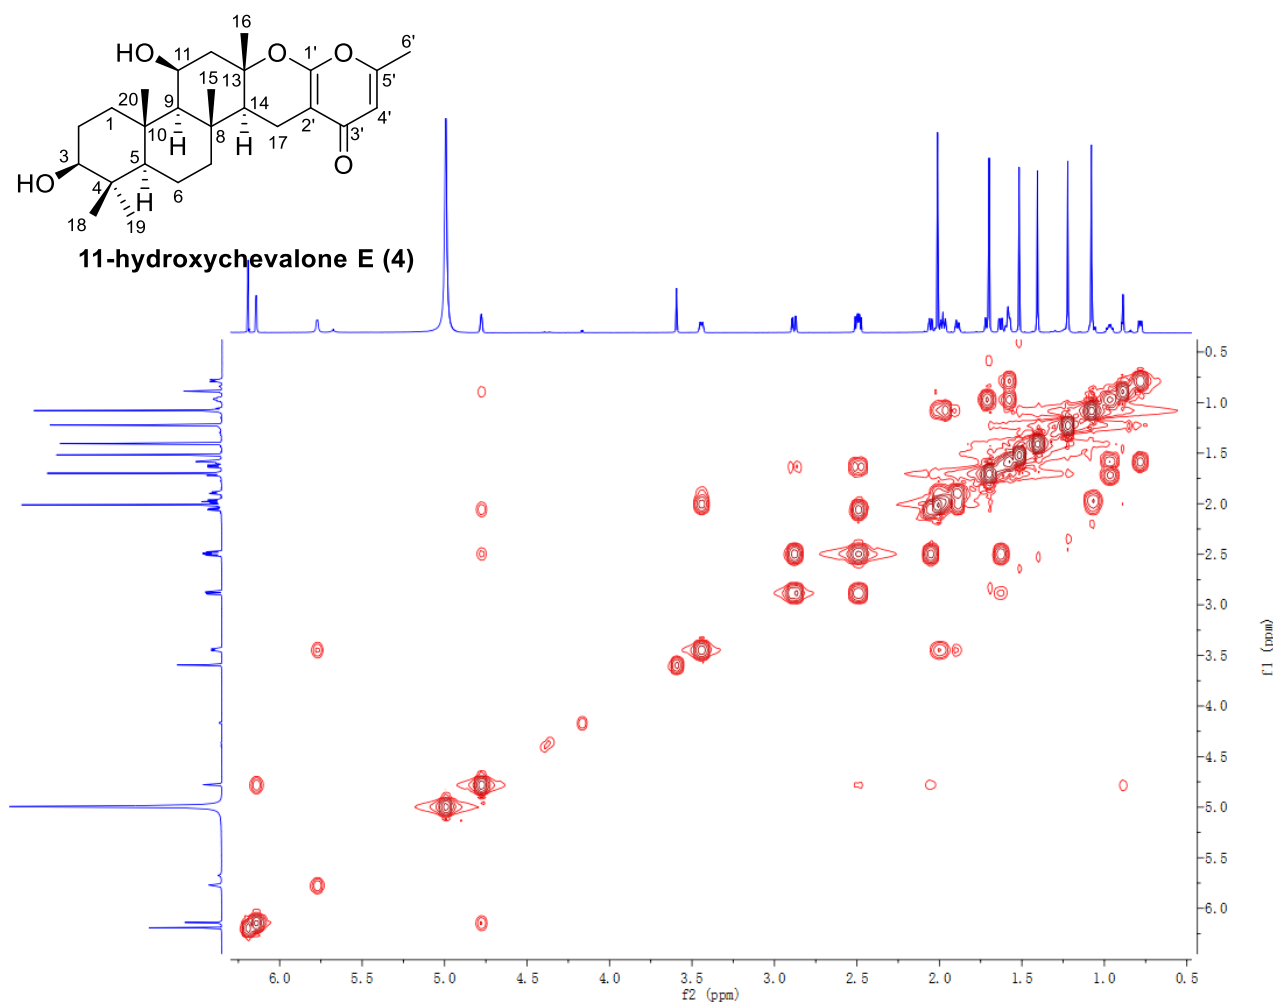

**Figure S25.**  $^1\text{H}$ - $^1\text{H}$  COSY spectrum of 11-hydroxychevalone E (**4**)

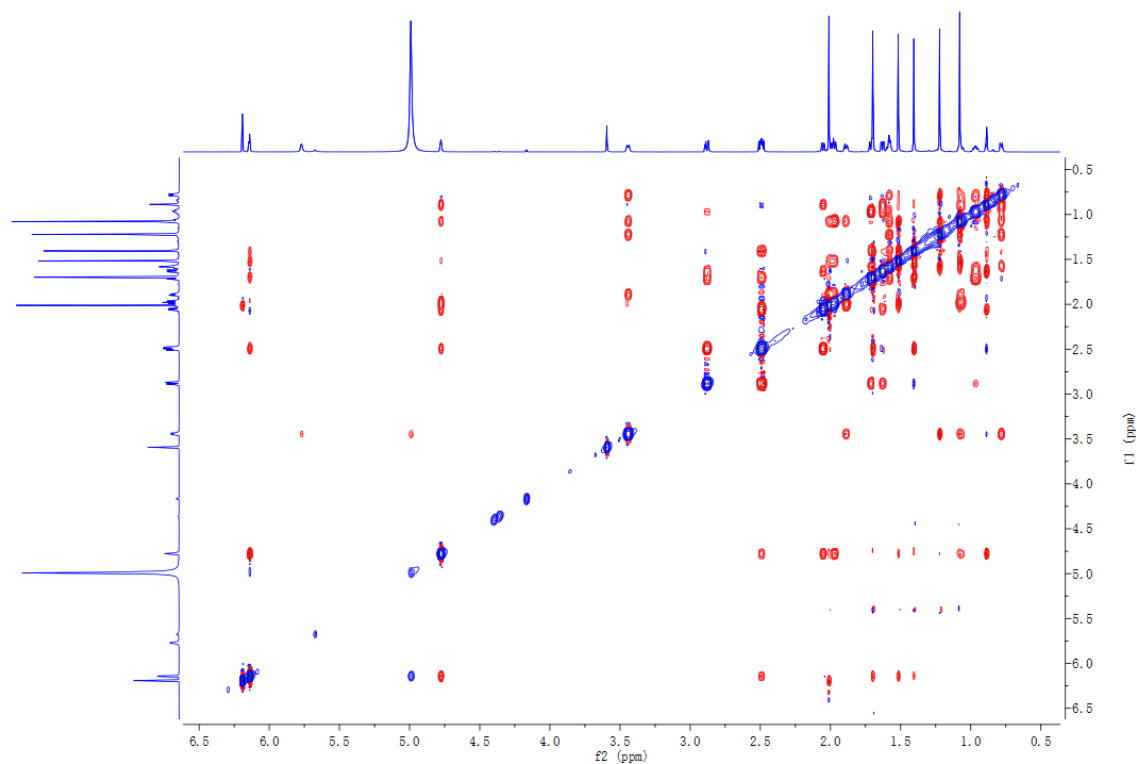

**Figure S26.** ROESY spectrum of 11-hydroxychevalone E (**4**)



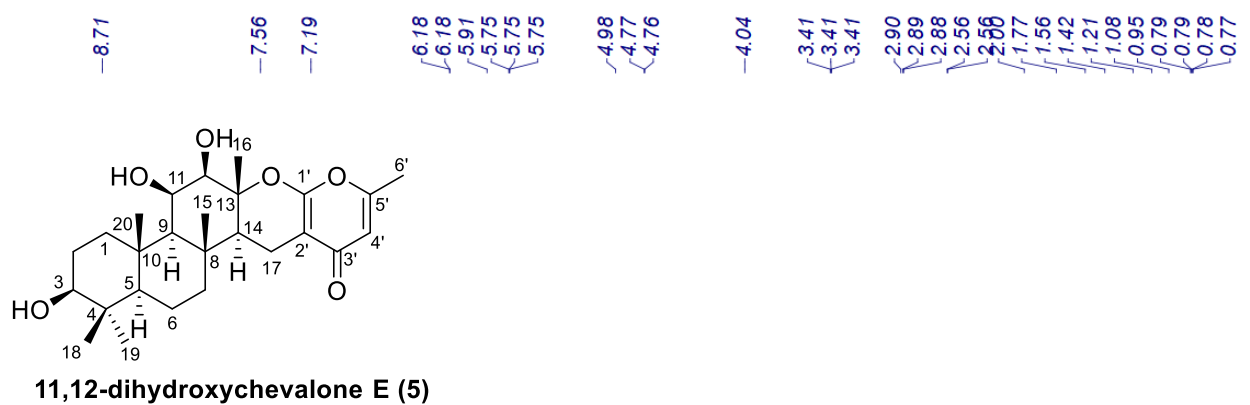

**Figure S27.**  $^1\text{H}$  NMR spectrum of 11,12-dihydroxychevalone E (5)

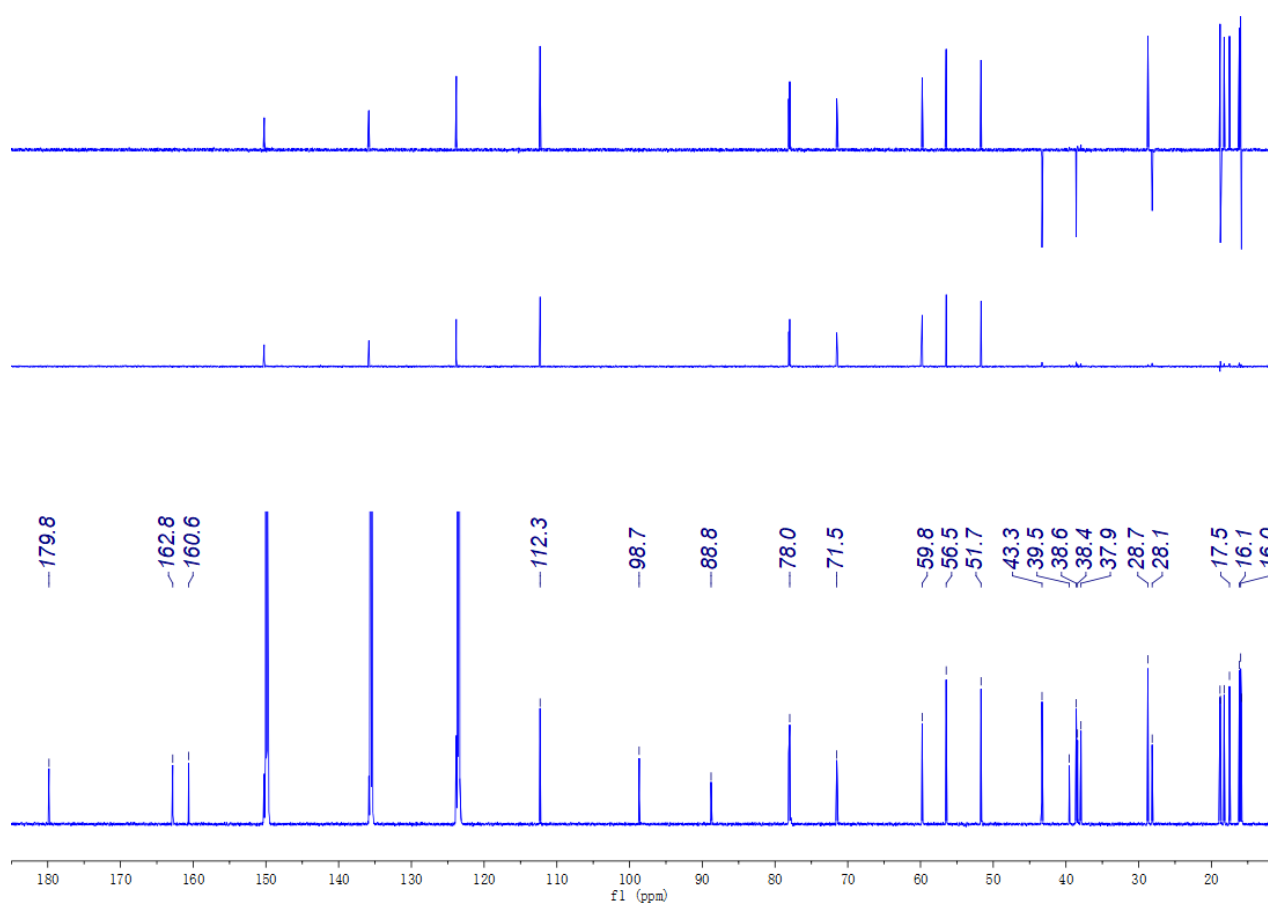

**Figure S28.**  $^{13}\text{C}$  NMR spectrum of 11,12-dihydroxychevalone E (5)

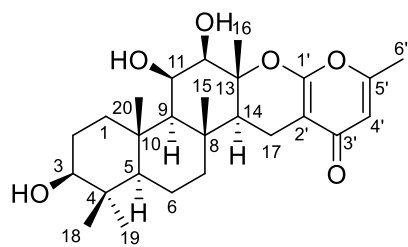

**11,12-dihydroxychevalone E (5)**

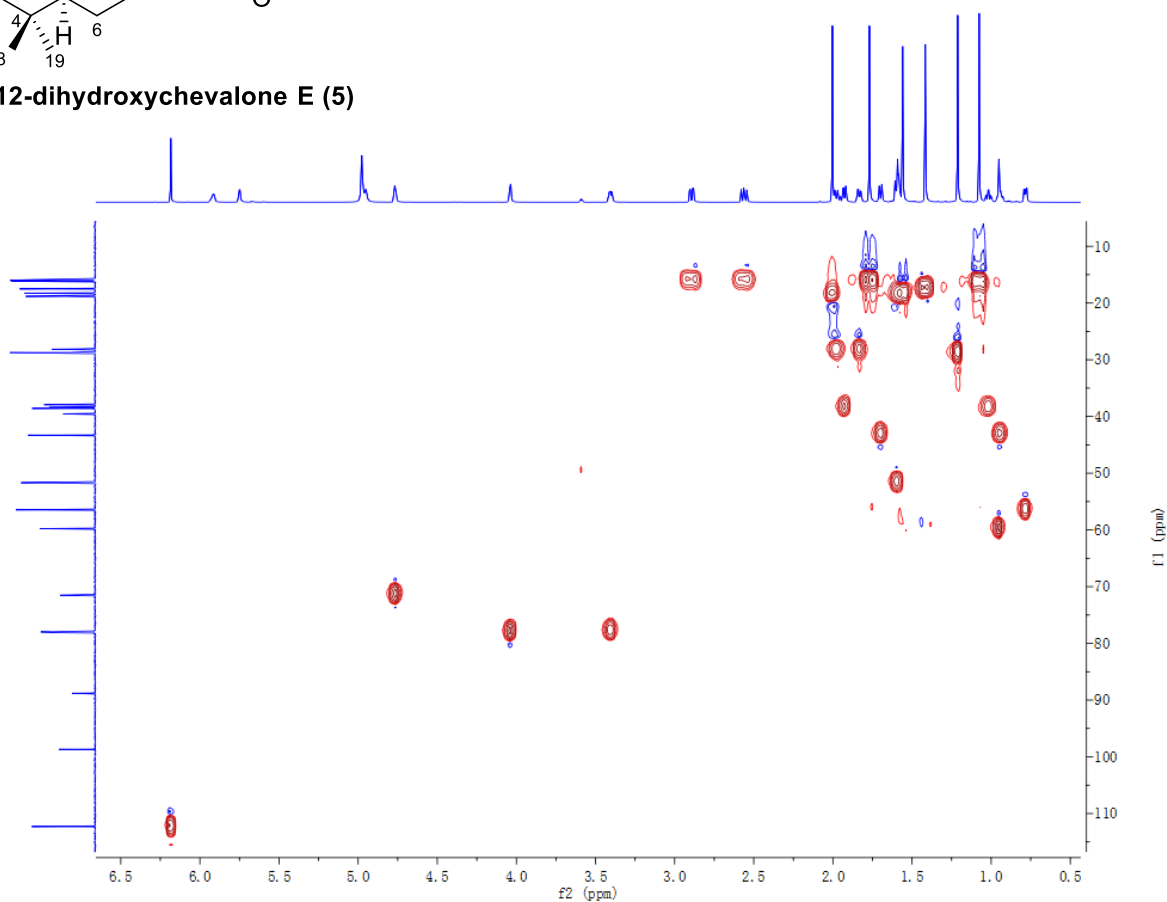

**Figure S29.** HSQC spectrum of 11,12-dihydroxychevalone E (5)

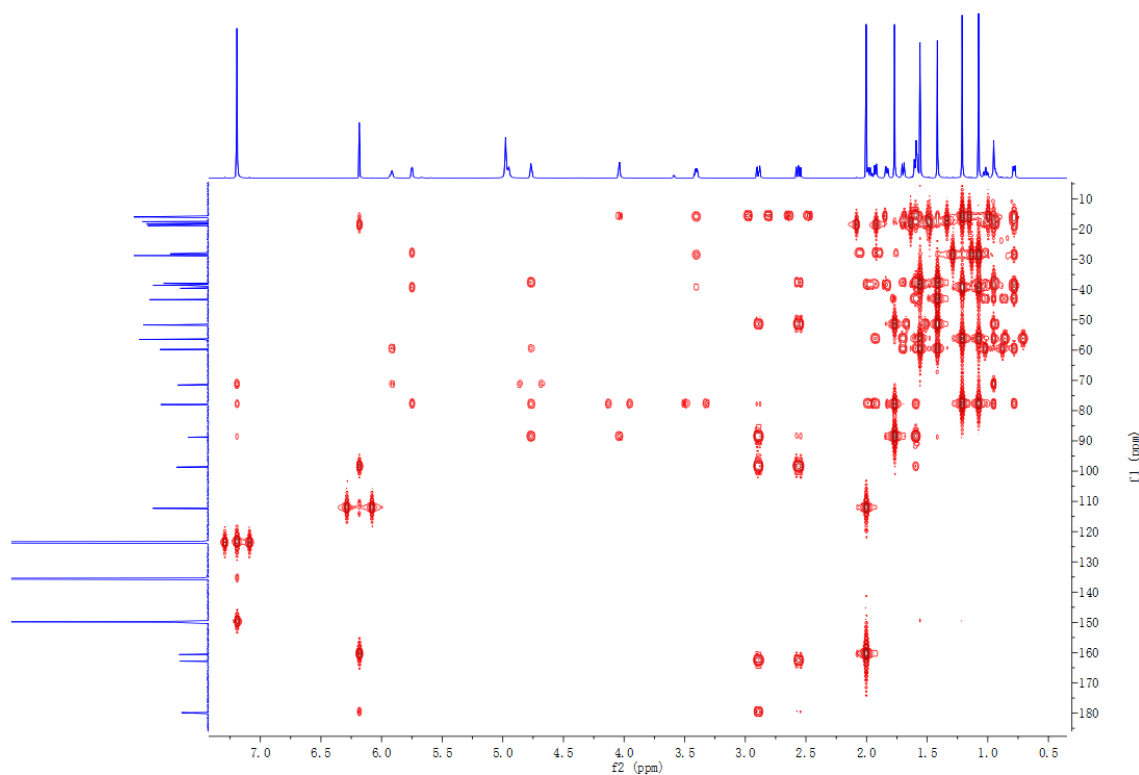

**Figure S30.** HMBC spectrum of 11,12-dihydroxychevalone E (5)

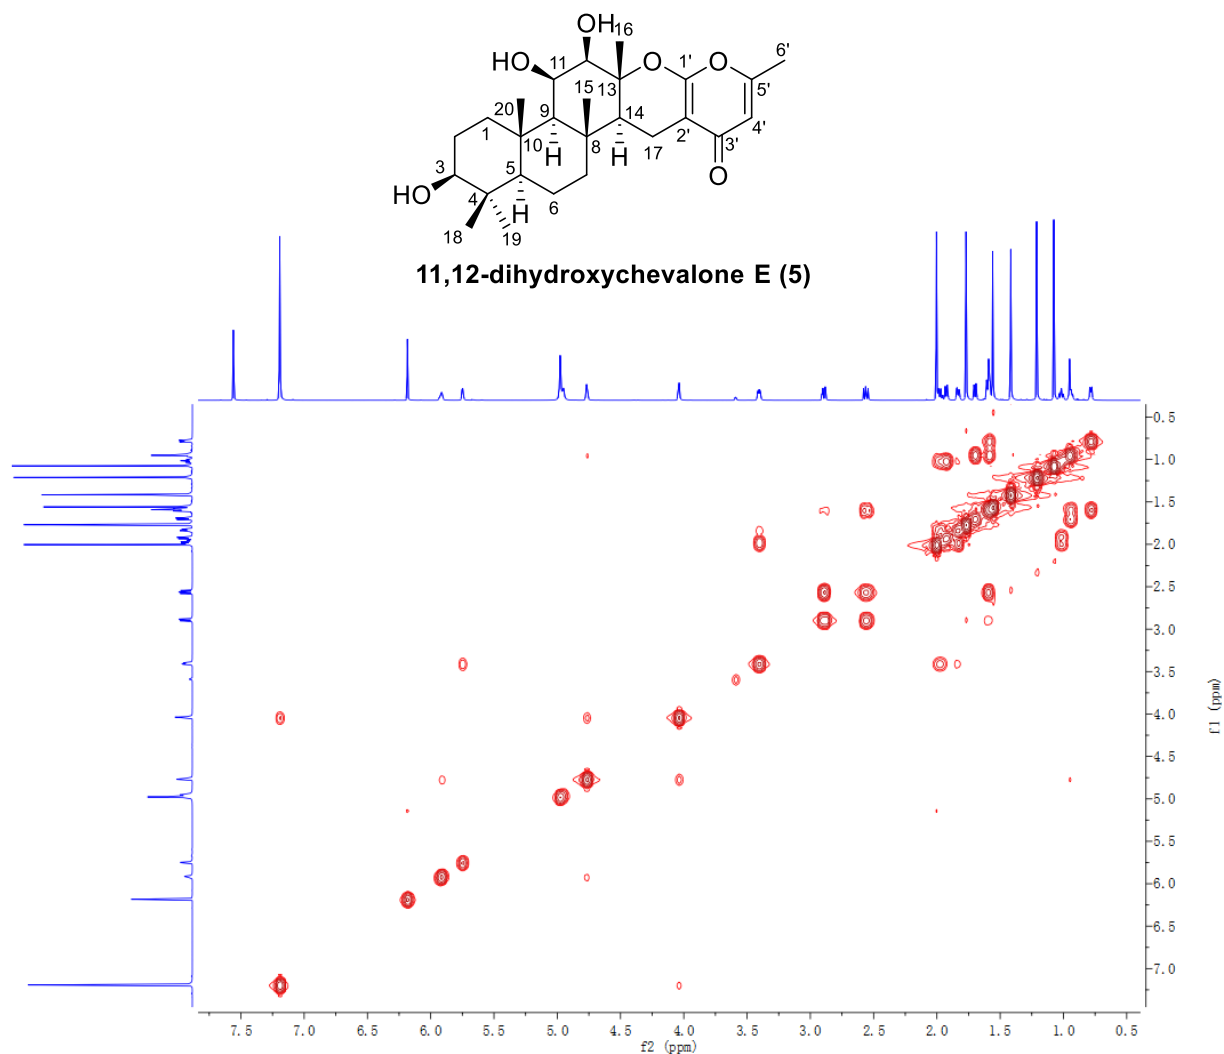

**Figure S31.**  $^1\text{H}$ - $^1\text{H}$  COSY spectrum of 11,12-dihydroxychevalone E (5)

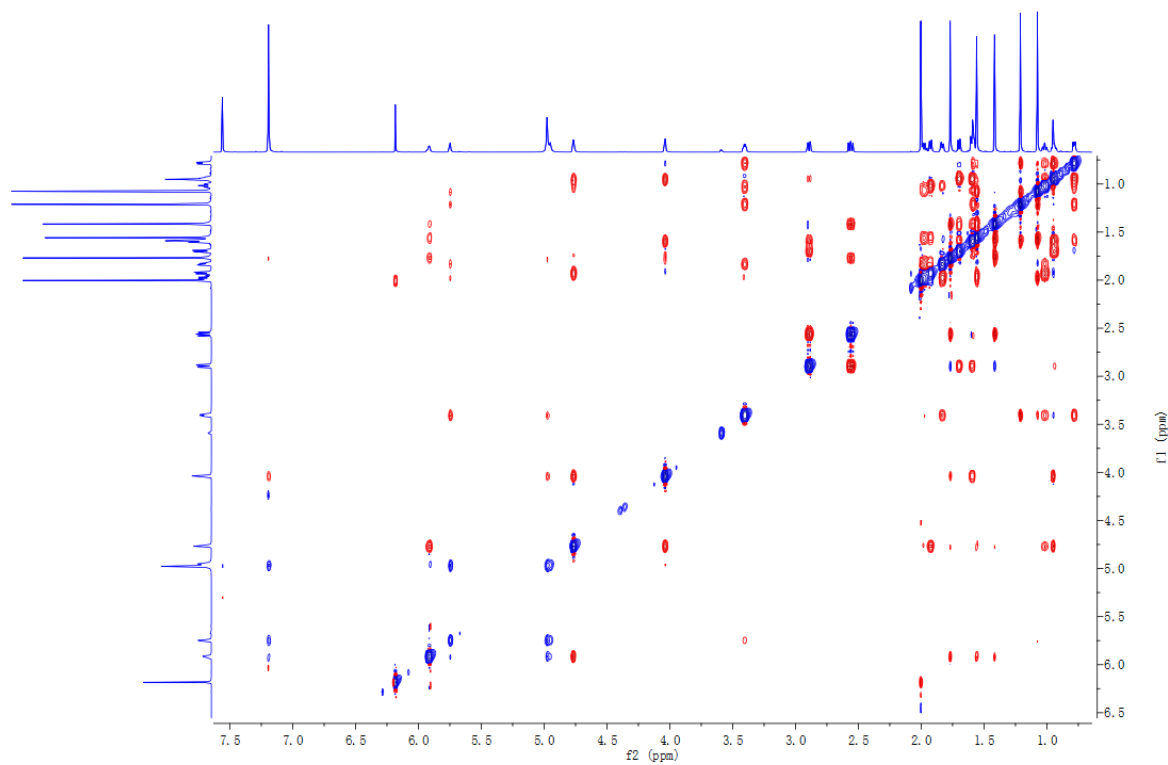

**Figure S32.** ROESY spectrum of 11,12-dihydroxychevalone E (5)

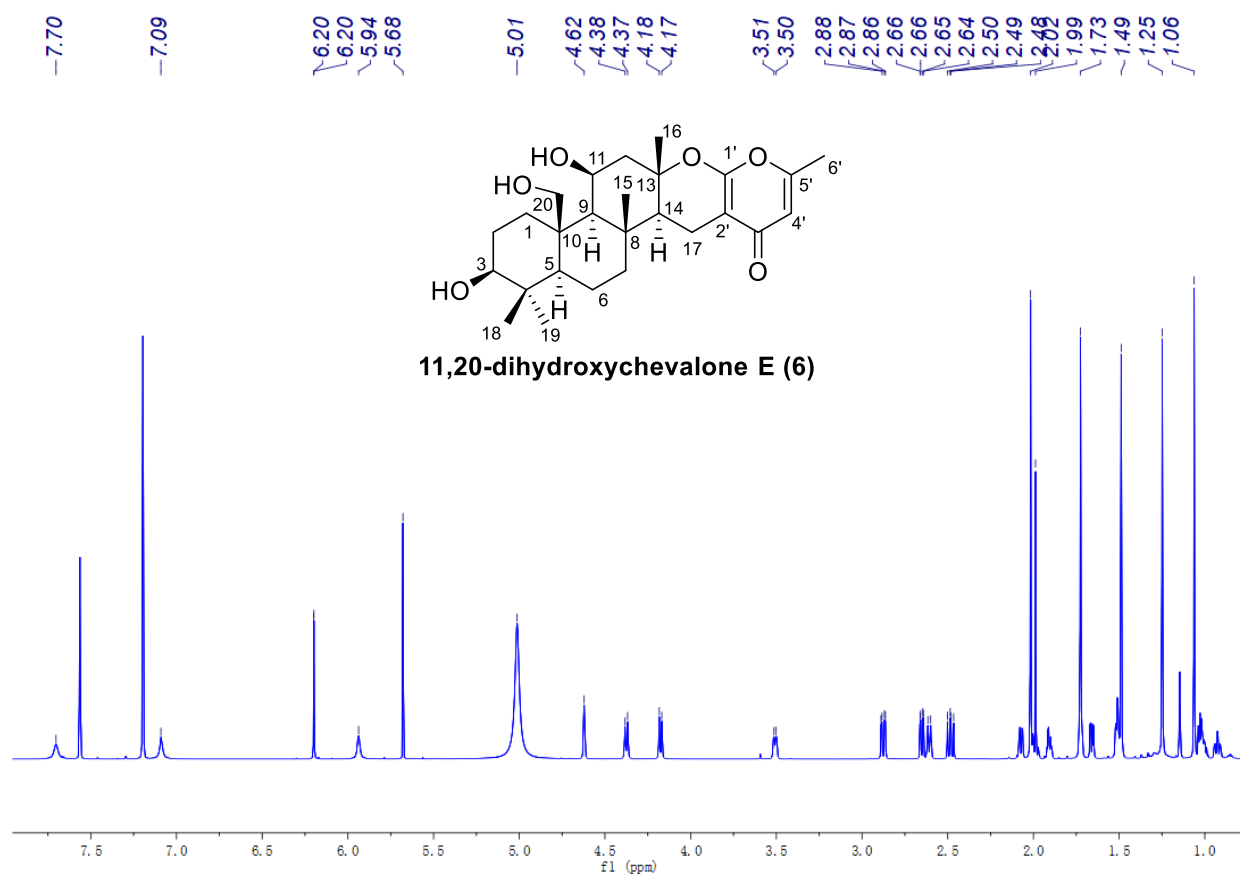

**Figure S33.** <sup>1</sup>H NMR spectrum of 11,20-dihydroxychevalone E (6)

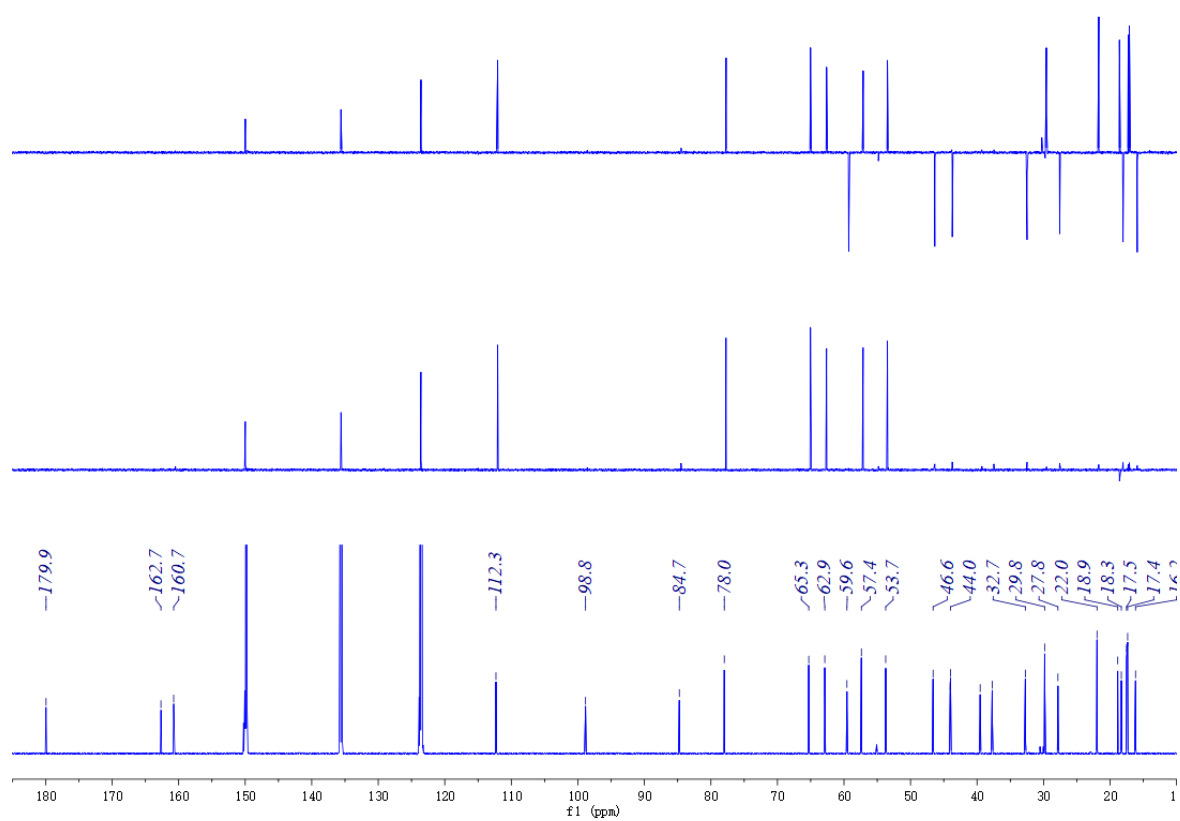

**Figure S34.** <sup>13</sup>C NMR spectrum of 11,20-dihydroxychevalone E (6)

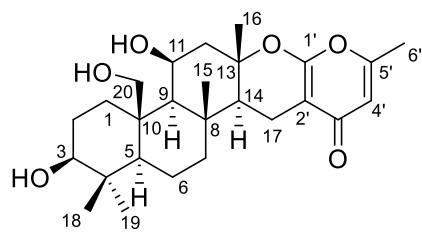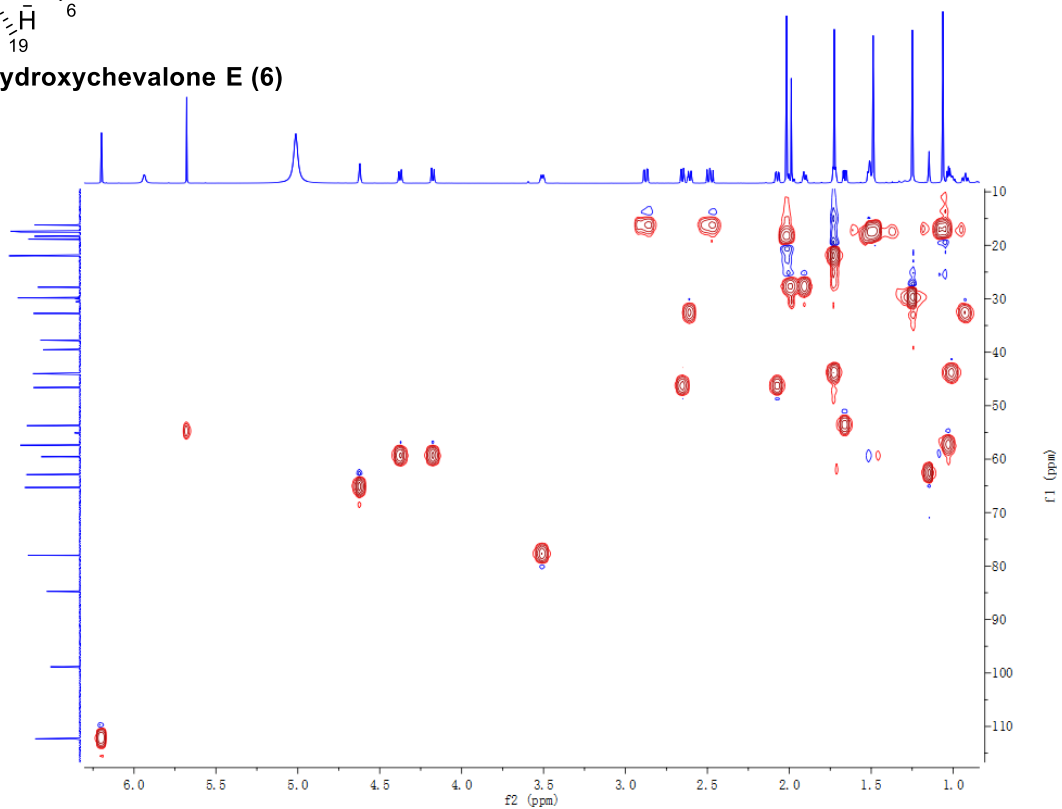

**Figure S35.** HSQC spectrum of 11,20-dihydroxychevalone E (6)

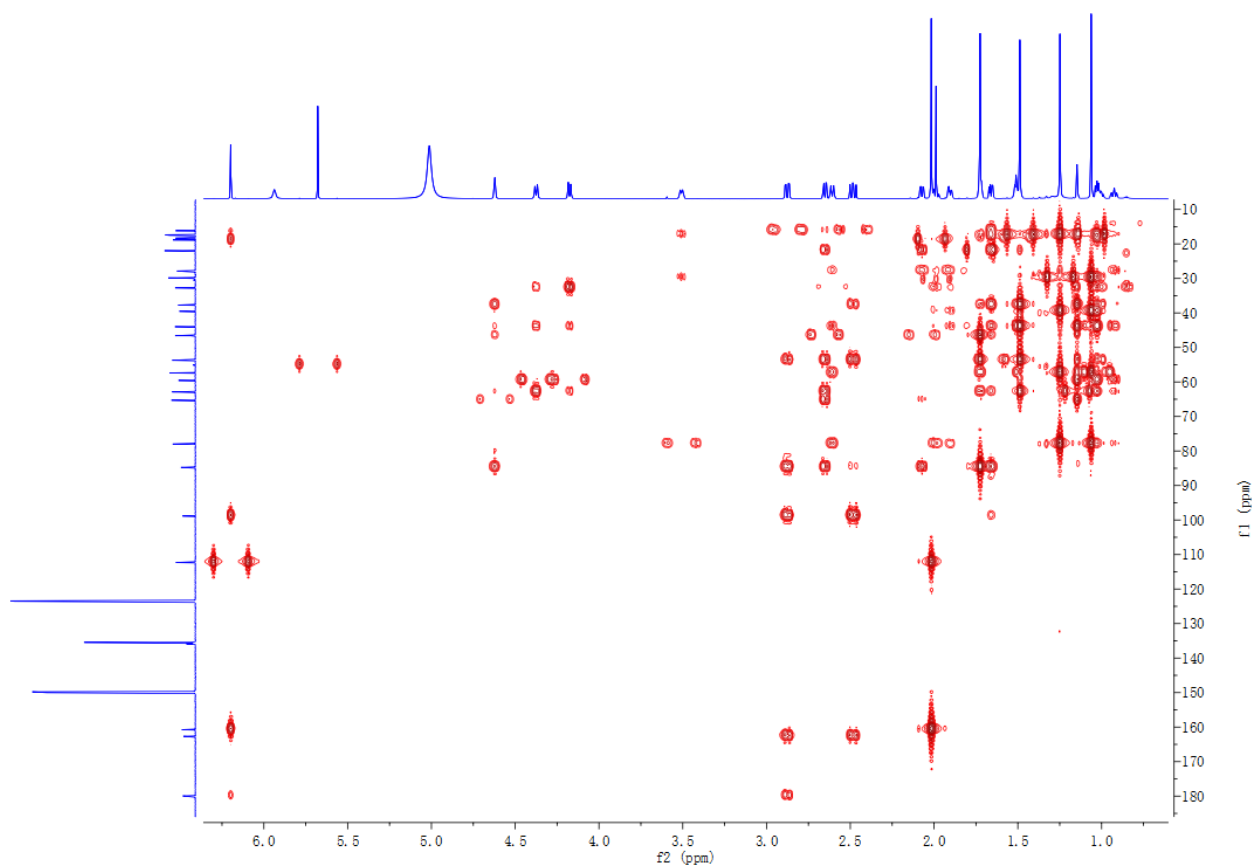

**Figure S36.** HMBC spectrum of 11,20-dihydroxychevalone E (6)

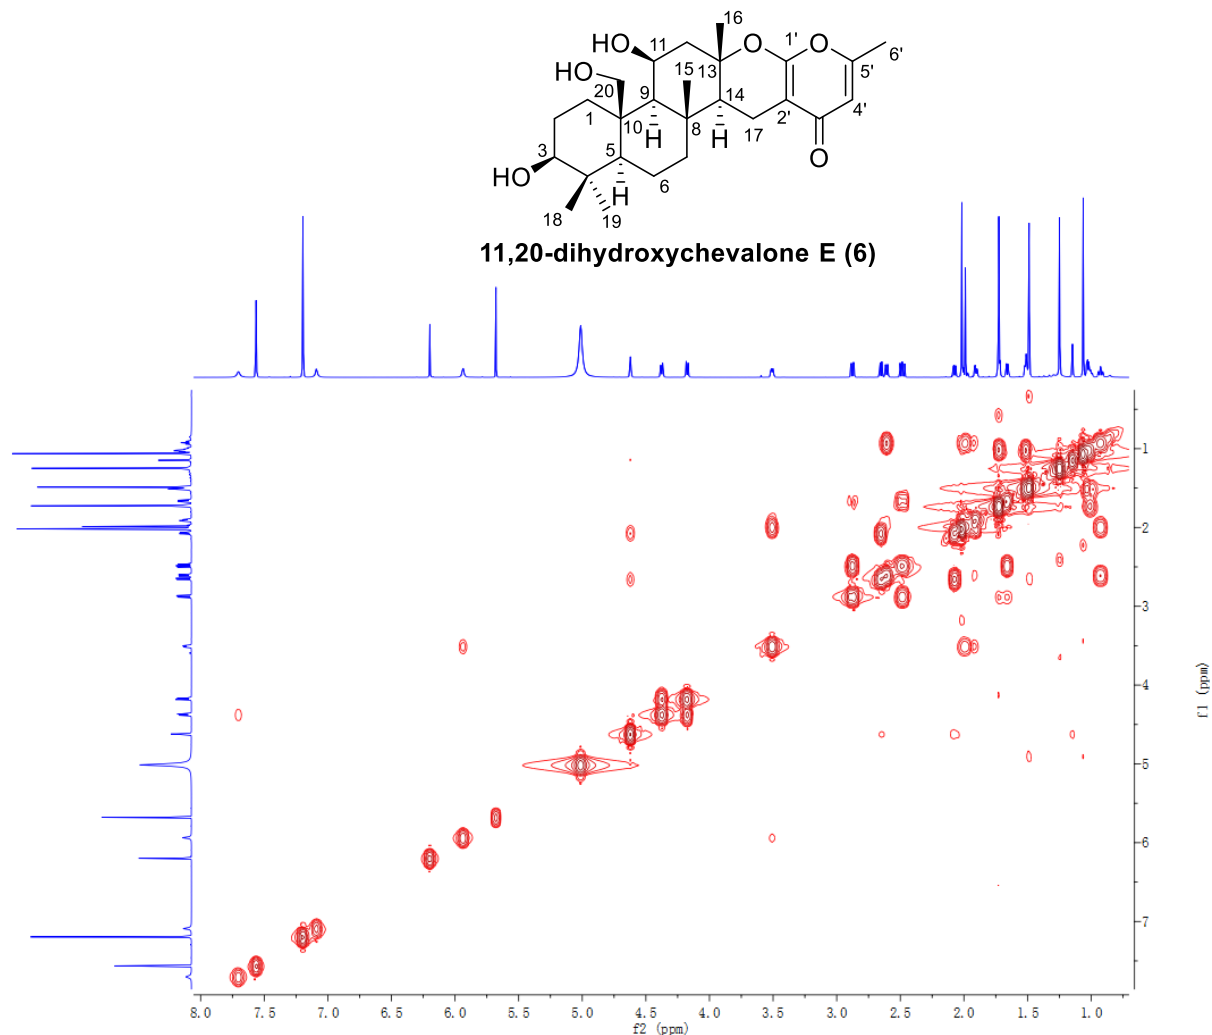

**Figure S37.**  $^1\text{H}$ - $^1\text{H}$  COSY spectrum of 11,20-dihydroxychevalone E (6)

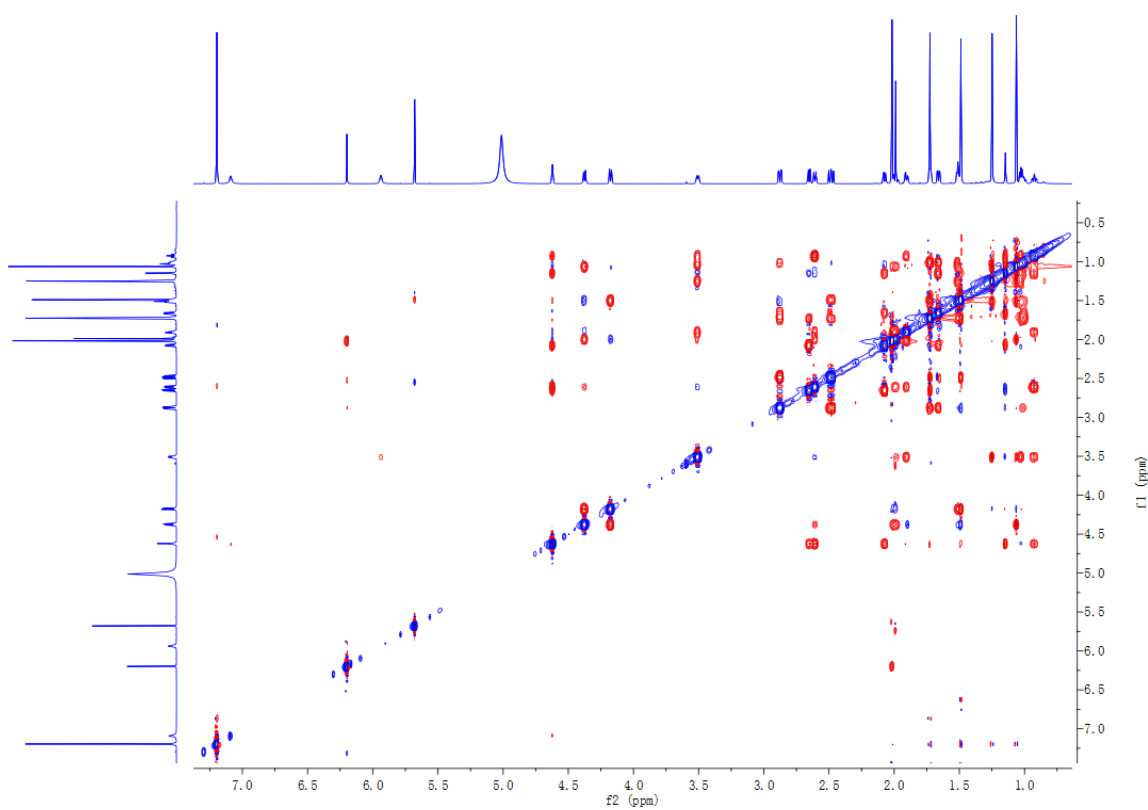

**Figure S38.** ROESY spectrum of 11,20-dihydroxychevalone E (6)

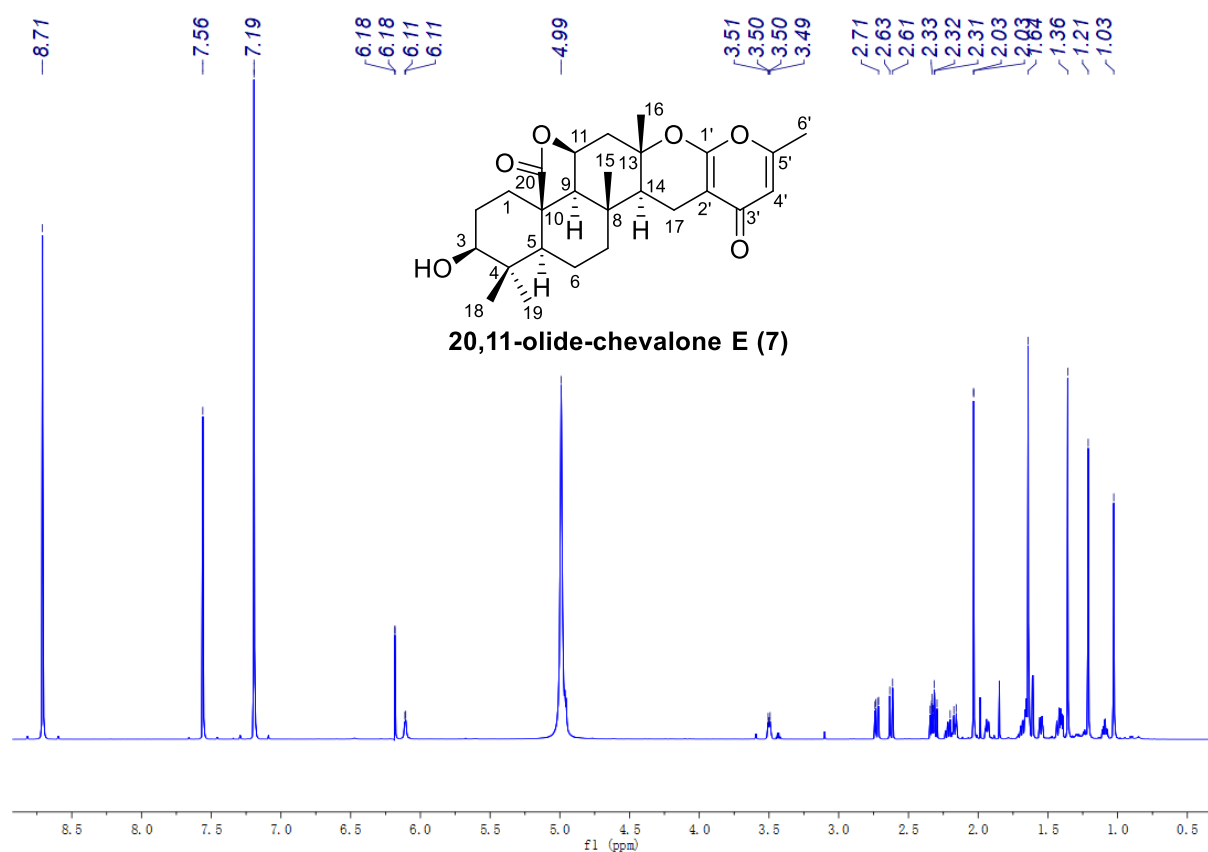

**Figure S39.** <sup>1</sup>H NMR spectrum of 20,11-olide-chevalone E (7)

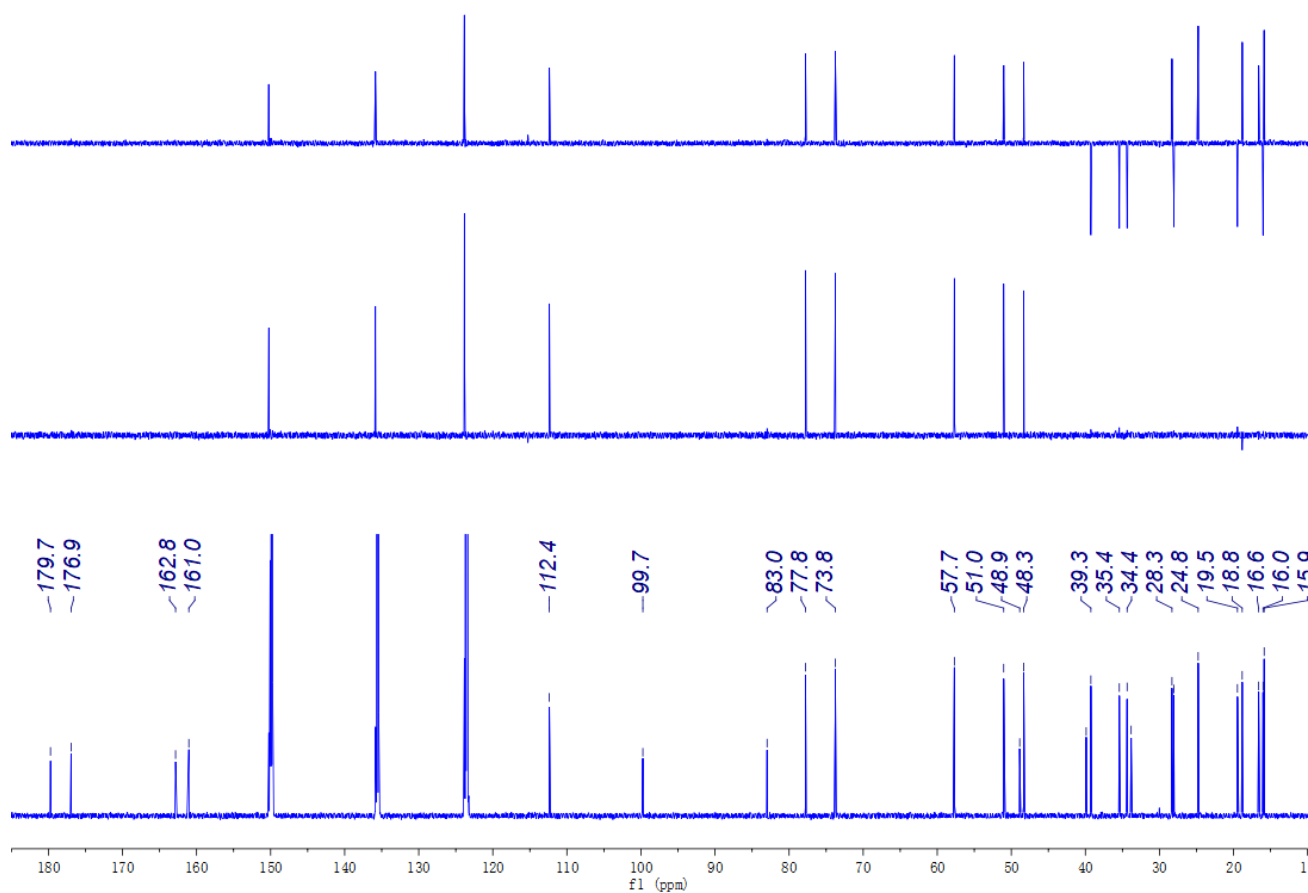

**Figure S40.** <sup>13</sup>C NMR spectrum of 20,11-olide-chevalone E (7)

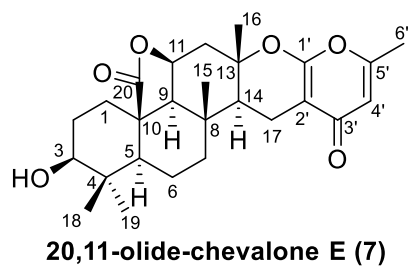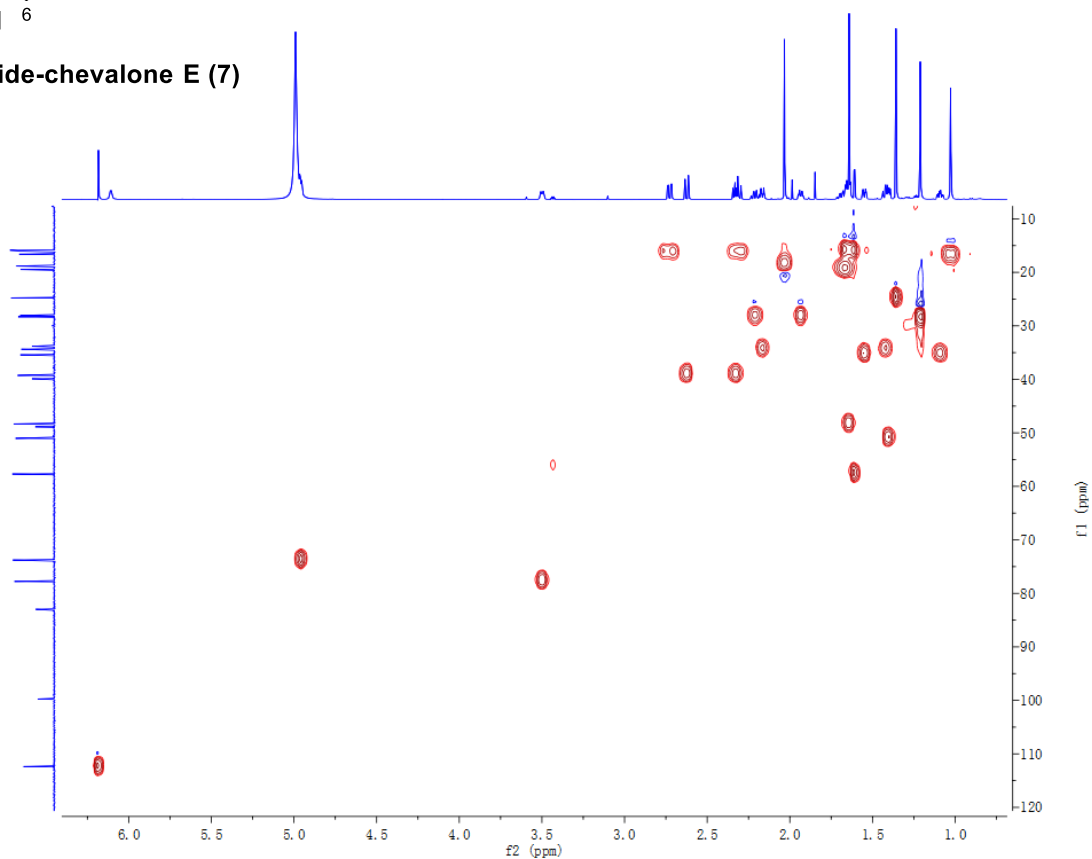

**Figure S41.** HSQC spectrum of 20,11-olide-chevalone E (7)

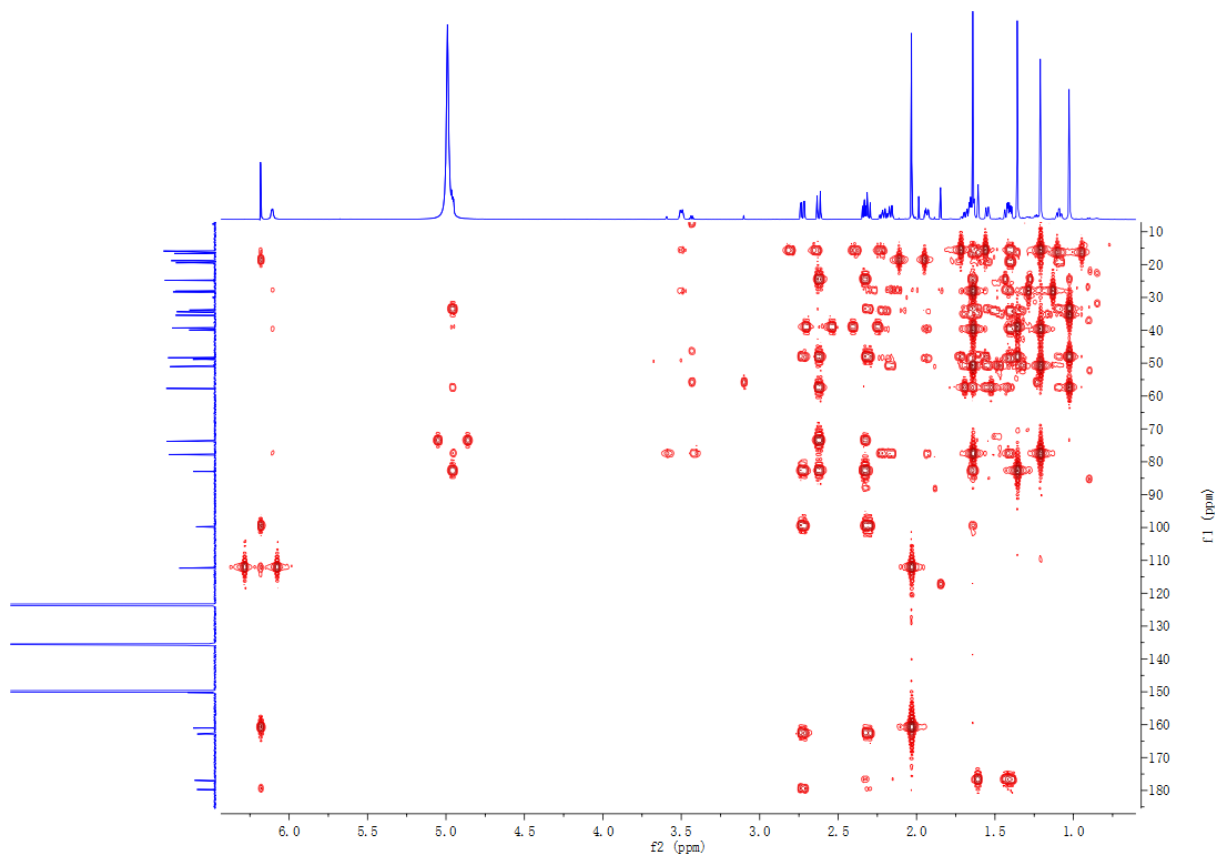

**Figure S42.** HMBC spectrum of 20,11-olide-chevalone E (7)



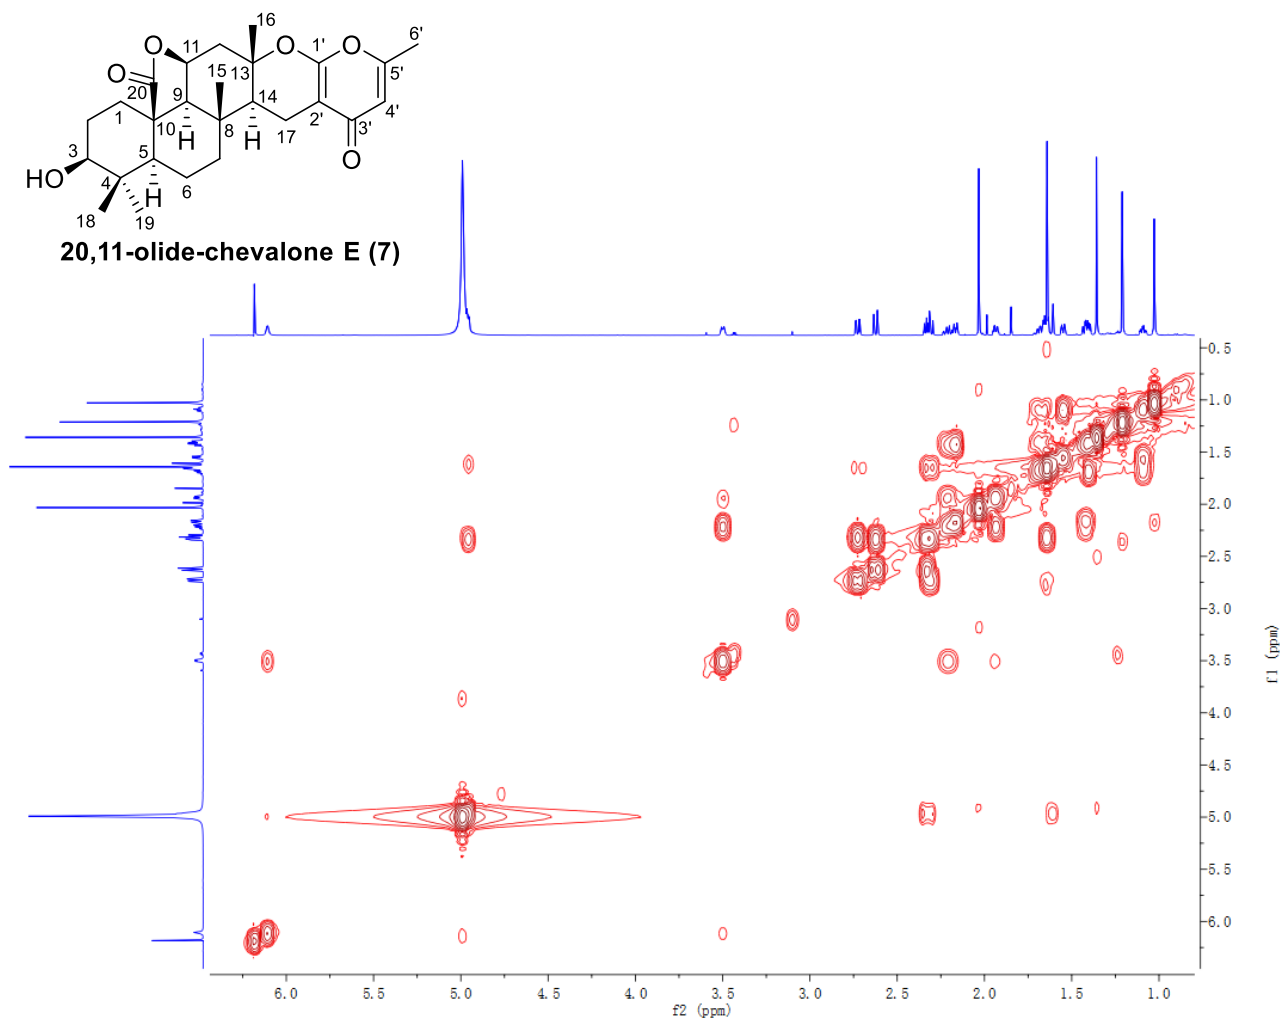

**Figure S43.**  $^1\text{H}$ - $^1\text{H}$  COSY spectrum of 20,11-olide-chevalone E (7)

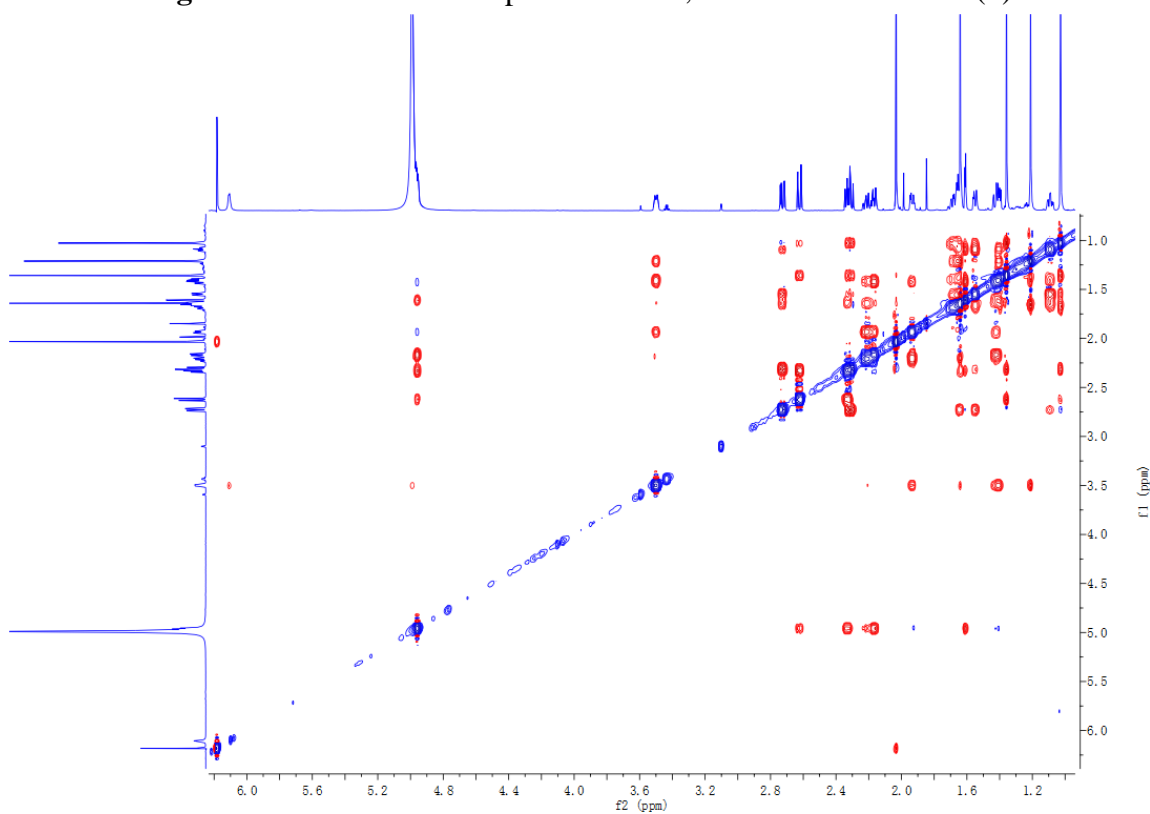

**Figure S44.** ROESY spectrum of 20,11-olide-chevalone E (7)

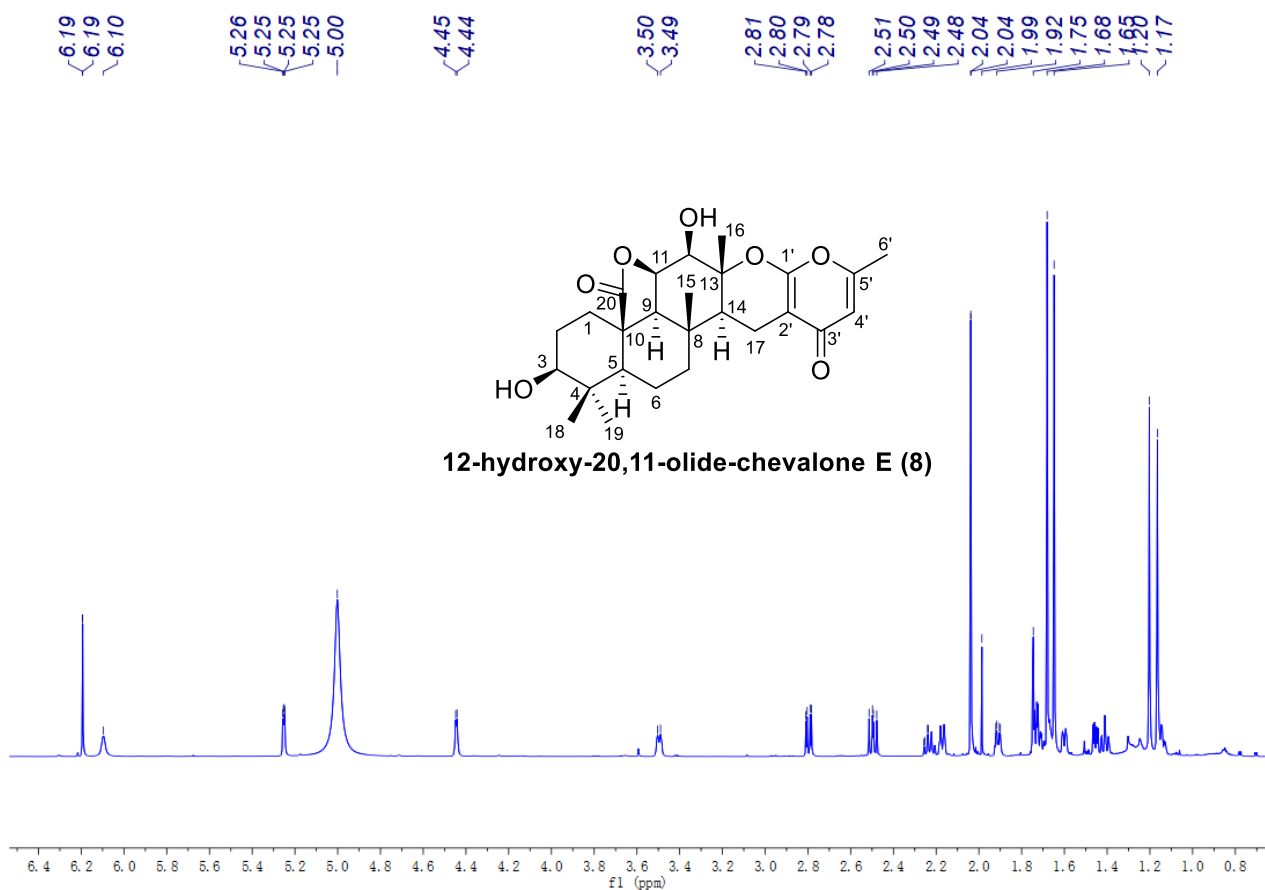

**Figure S45.** <sup>1</sup>H NMR spectrum of 12-hydroxy-20,11-olide-chevalone E (8)

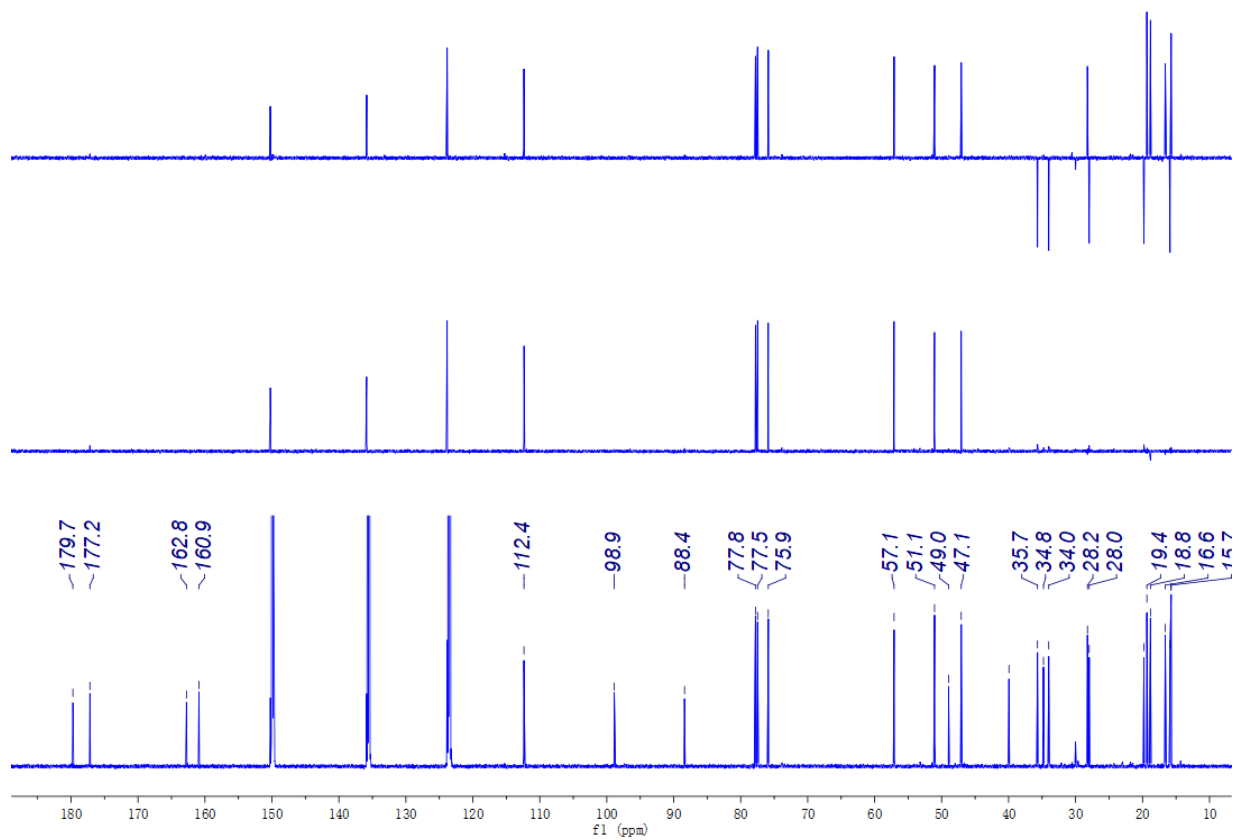

**Figure S46.** <sup>13</sup>C NMR spectrum of 12-hydroxy-20,11-olide-chevalone E (8)

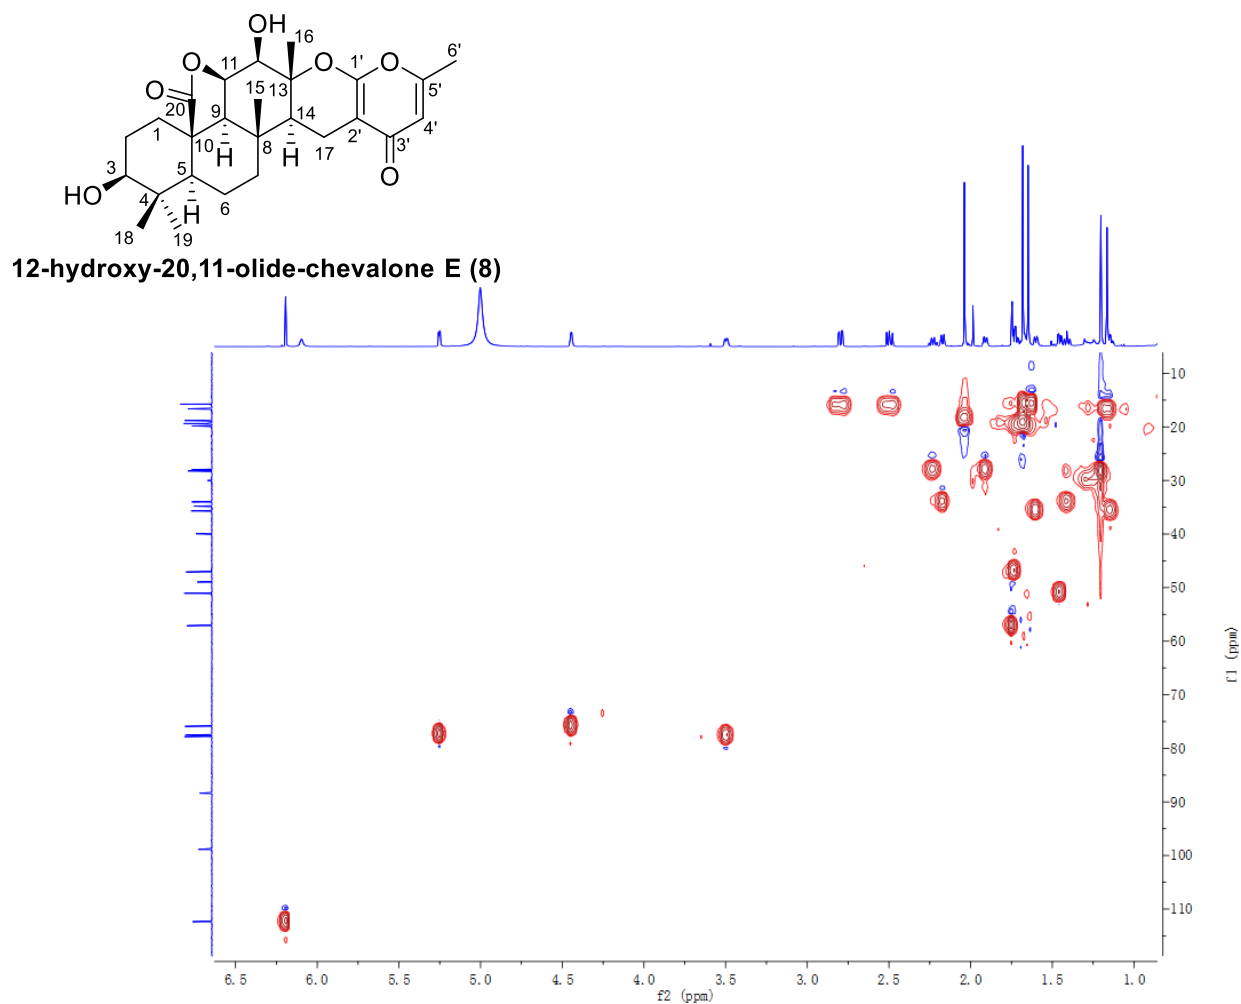

**Figure S47.** HSQC spectrum of 12-hydroxy-20,11-olide-chevalone E (8)

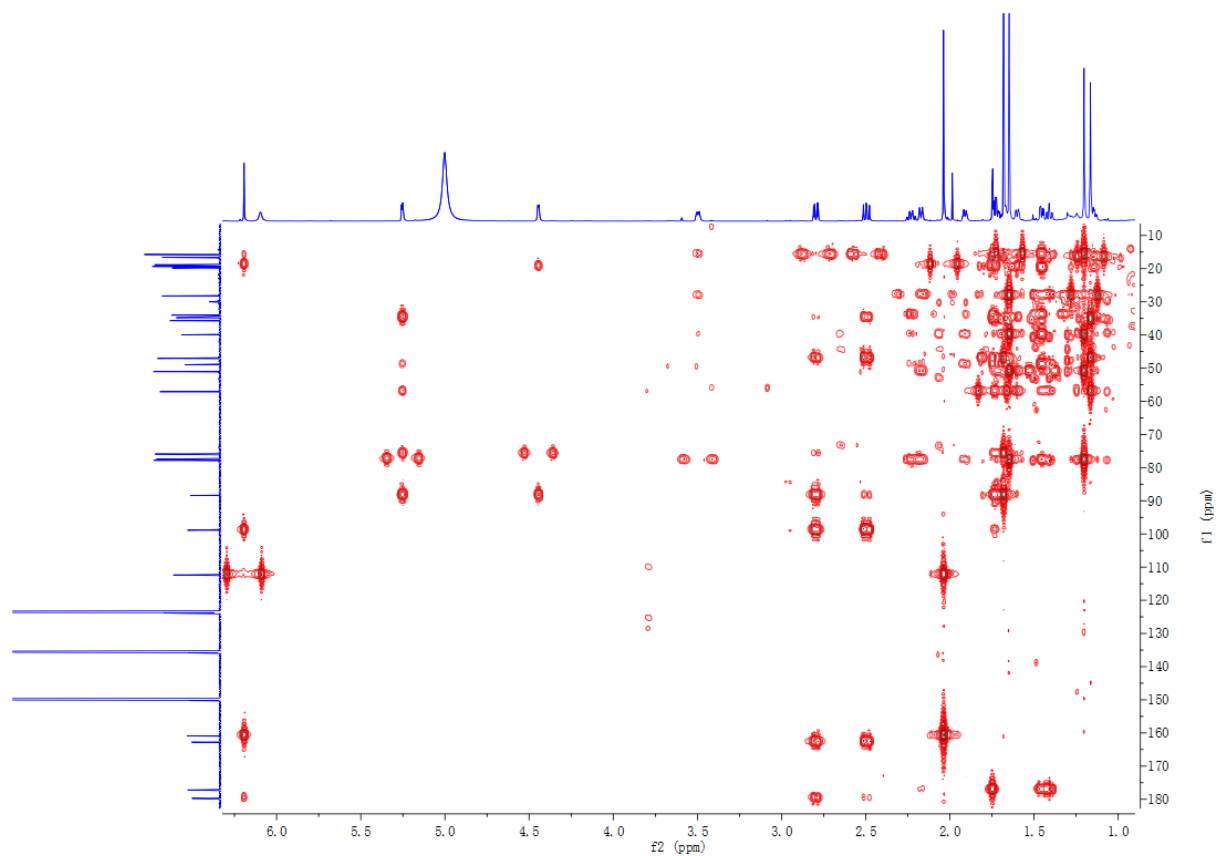

**Figure S48.** HMBC spectrum of 12-hydroxy-20,11-olide-chevalone E (8)

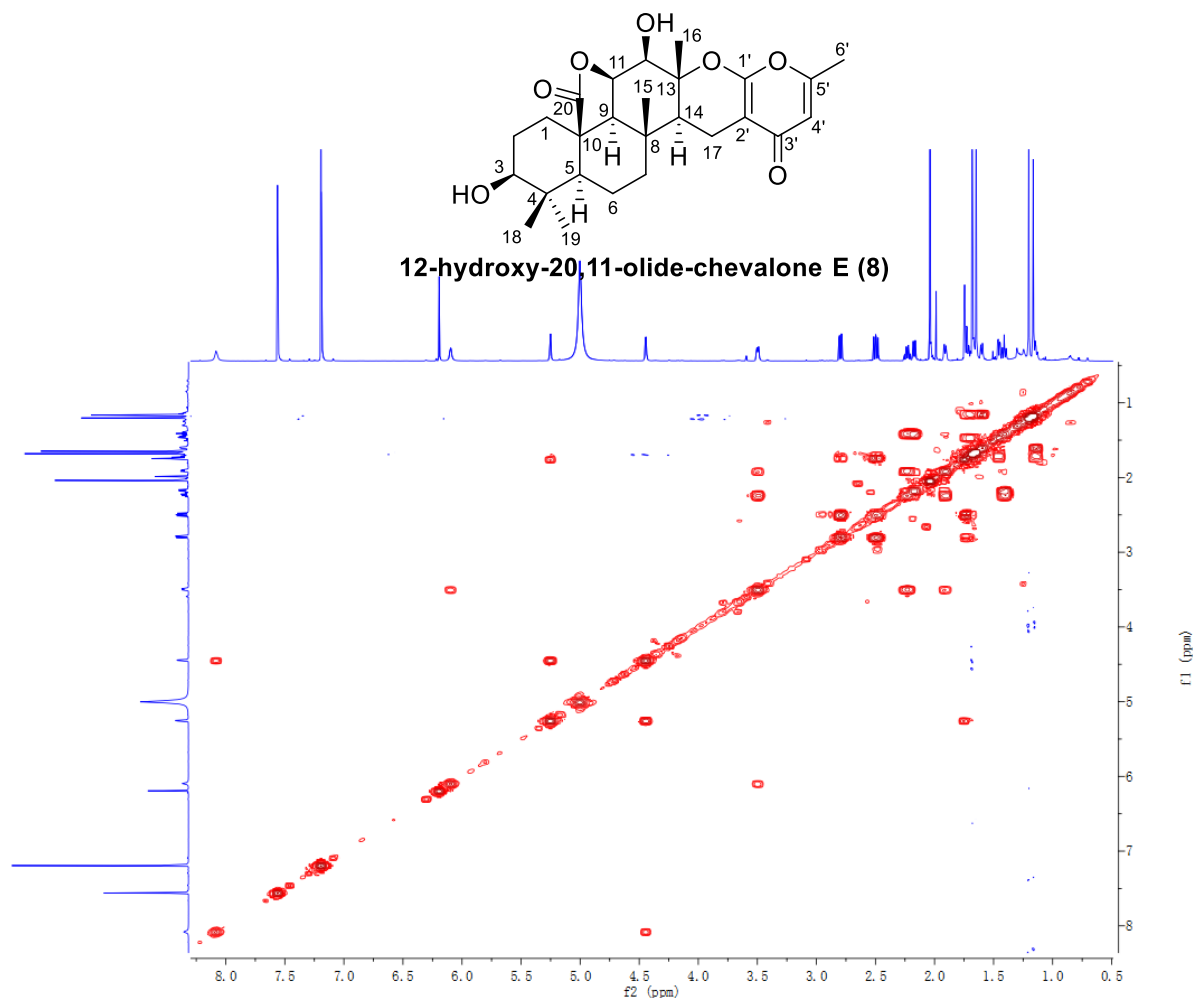

**Figure S49.**  $^1\text{H}$ - $^1\text{H}$  COSY spectrum of 12-hydroxy-20,11-olide-chevalone E (8)

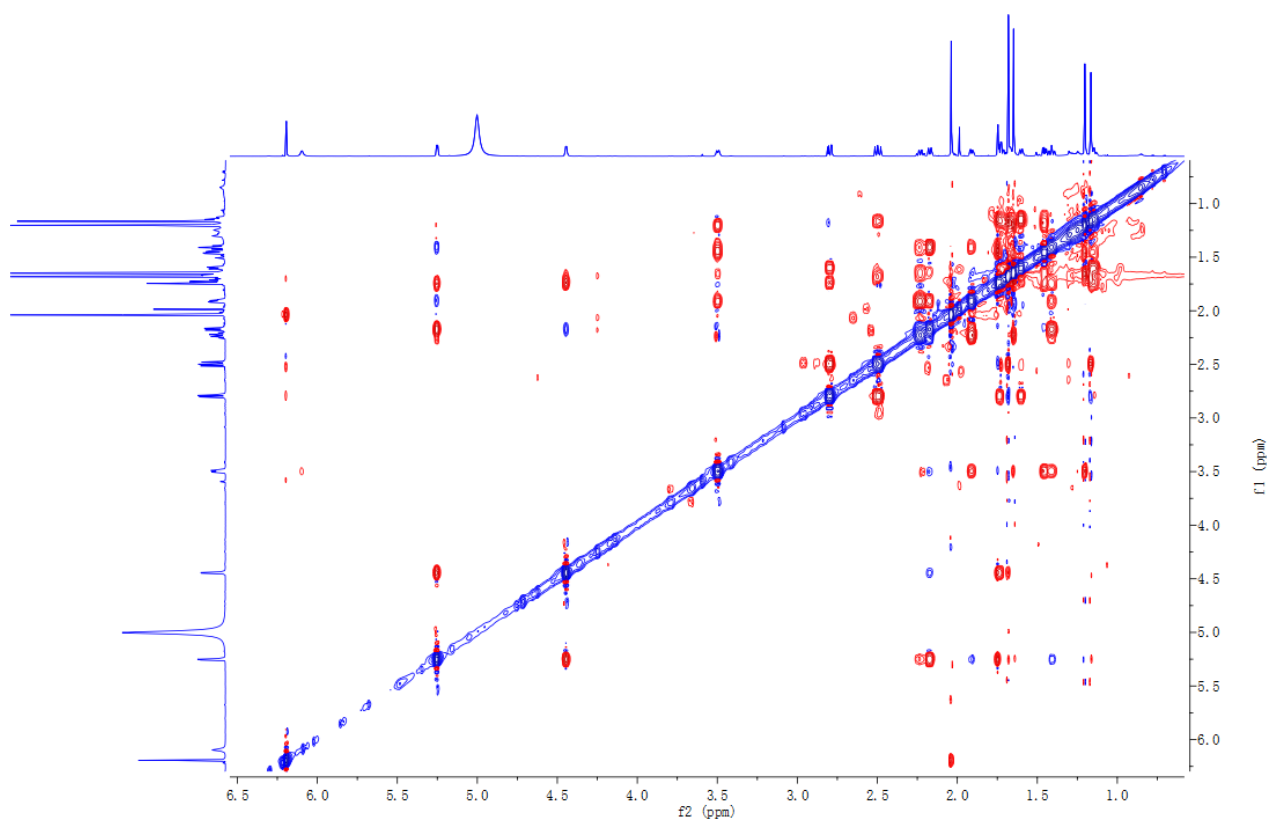

**Figure S50.**  $^1\text{H}$ - $^1\text{H}$  COSY spectrum of 12-hydroxy-20,11-olide-chevalone E (8)

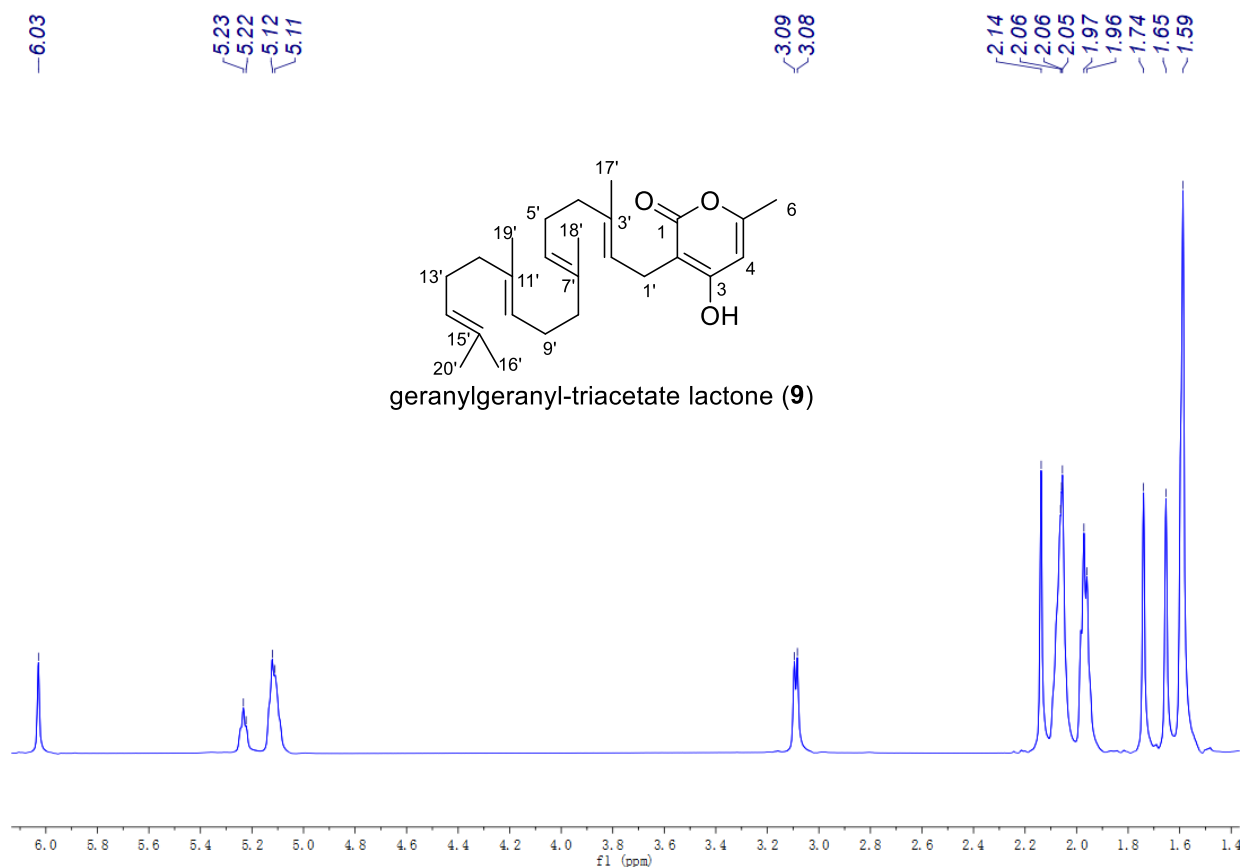

**Figure S51.**  $^1\text{H}$  NMR spectrum of geranylgeranyl-triacetate lactone (**9**)

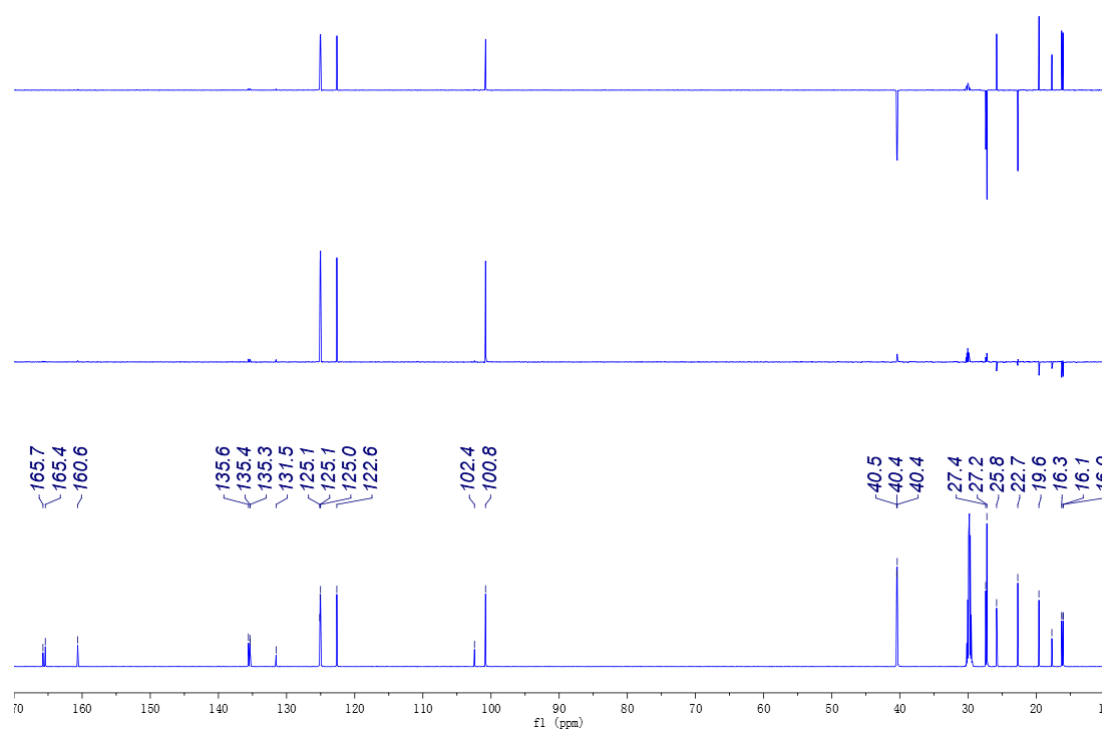

**Figure S52.**  $^{13}\text{C}$  NMR spectrum of geranylgeranyl-triacetate lactone (**9**)

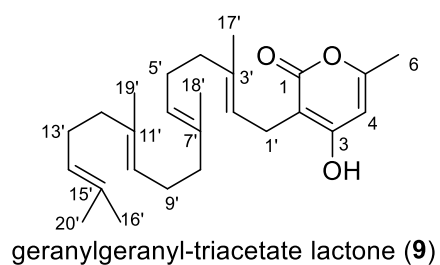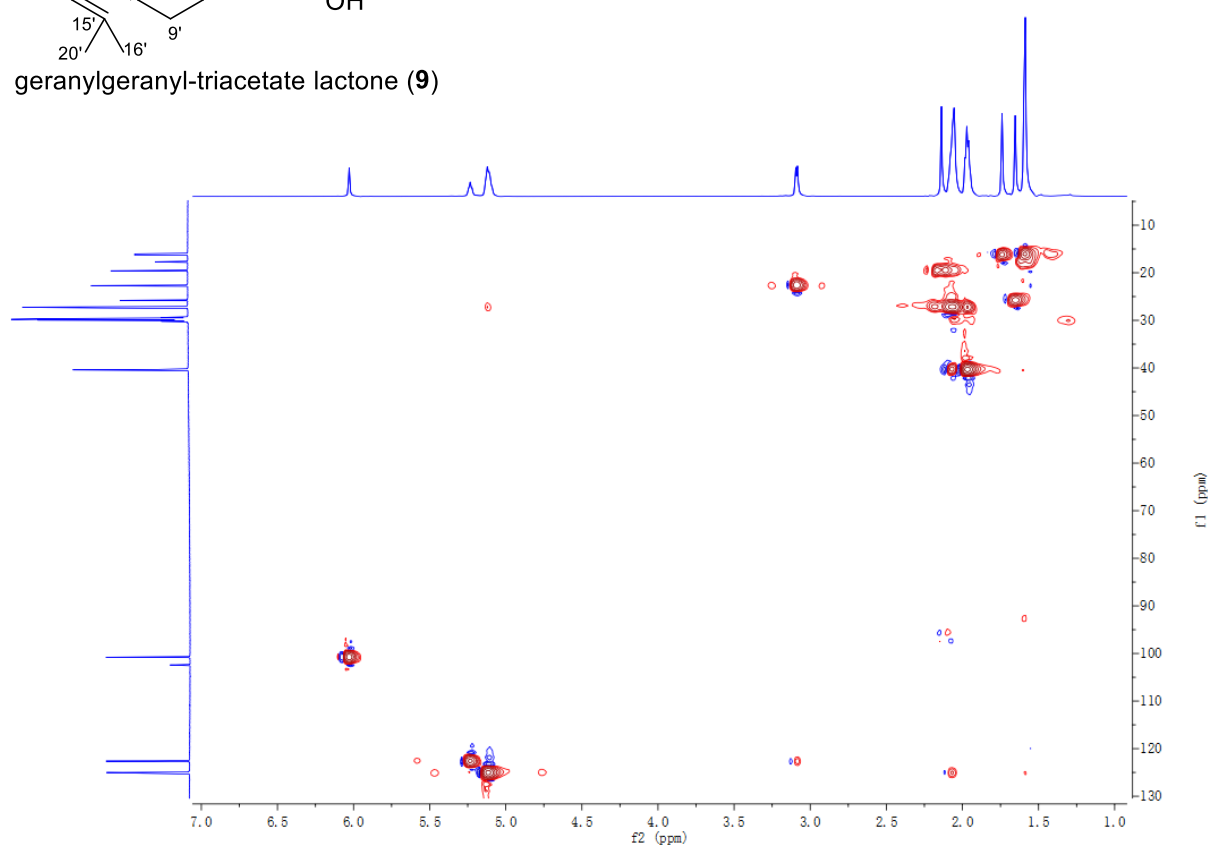

**Figure S53.** HSQC spectrum of geranylgeranyl-triacetate lactone (**9**)

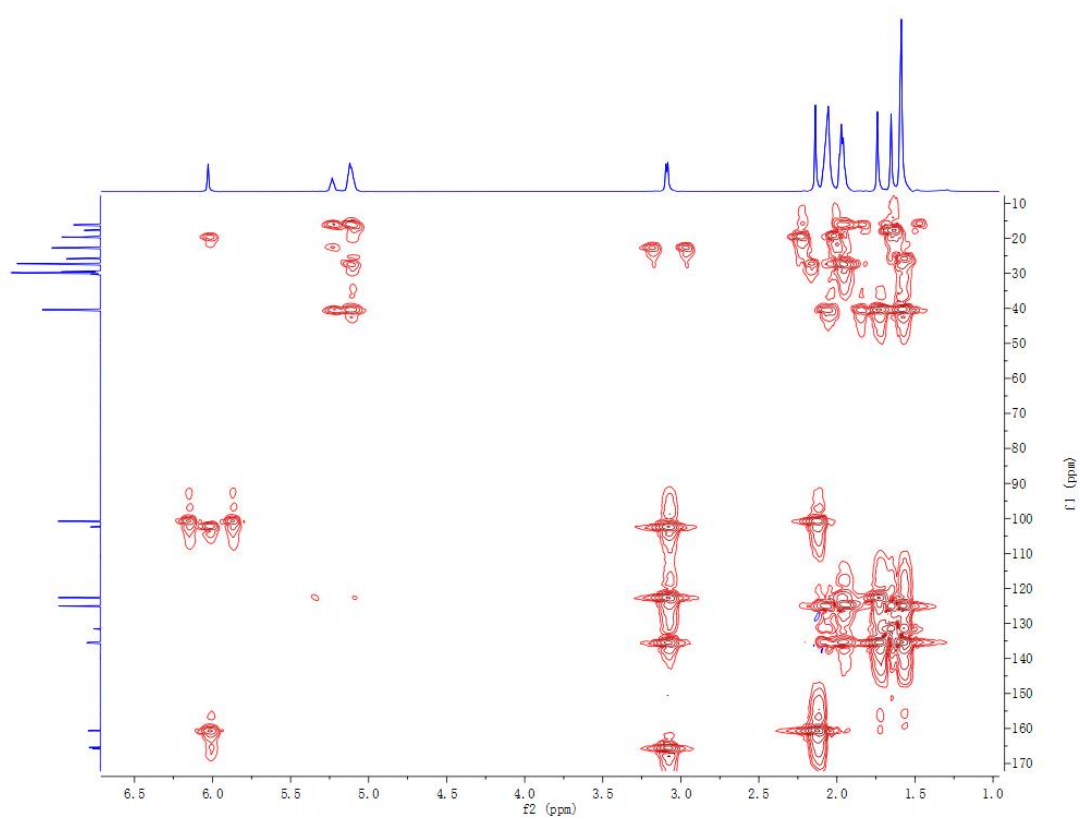

**Figure S54.** HMBC spectrum of geranylgeranyl-triacetate lactone (**9**)

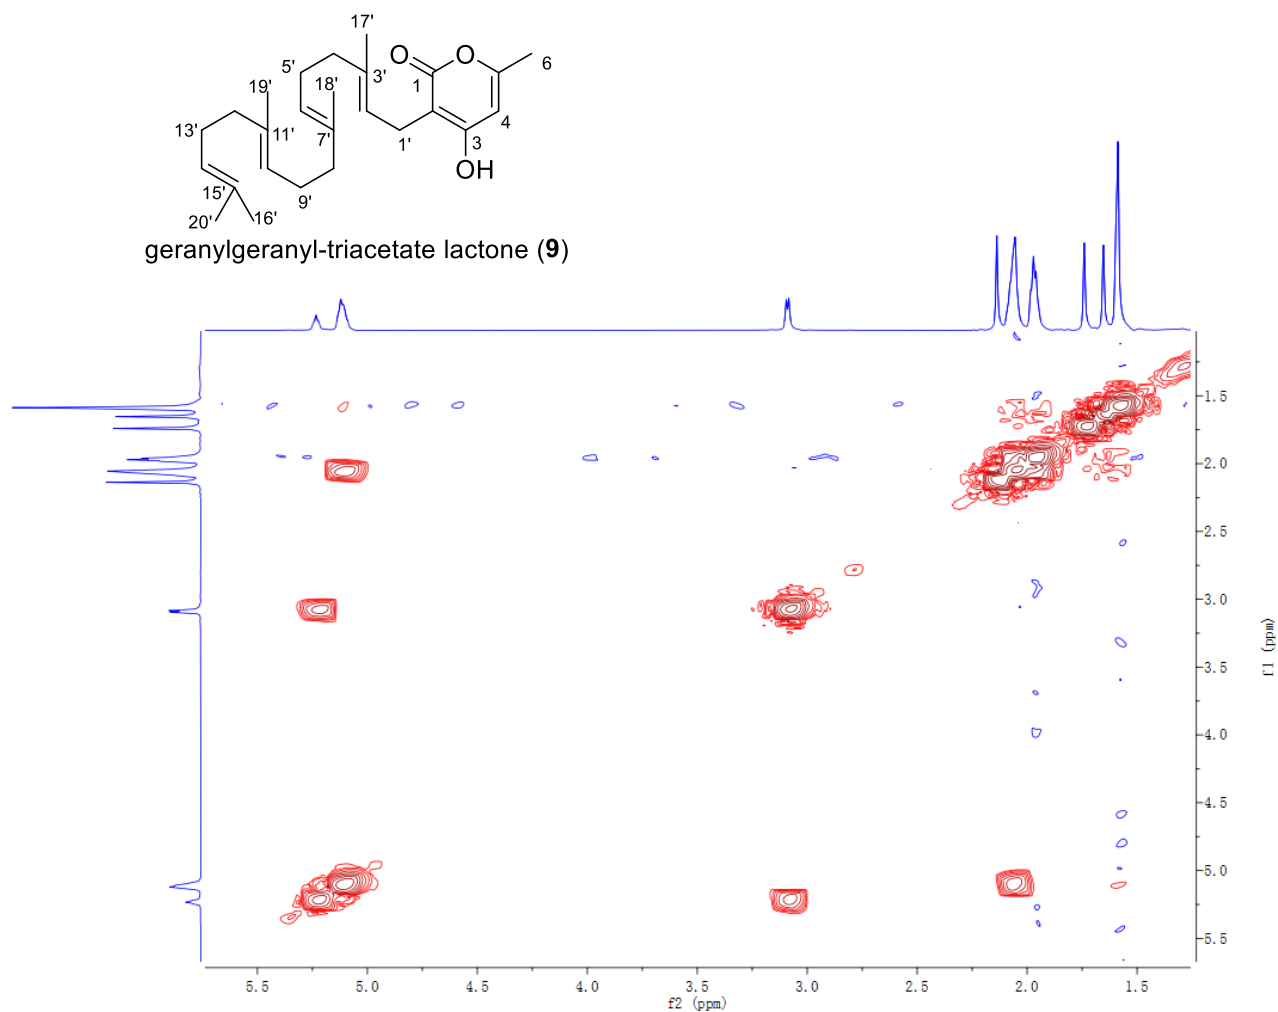

**Figure S55.**  $^1\text{H}$ - $^1\text{H}$  COSY spectrum of geranylgeranyl-triacetate lactone (**9**)

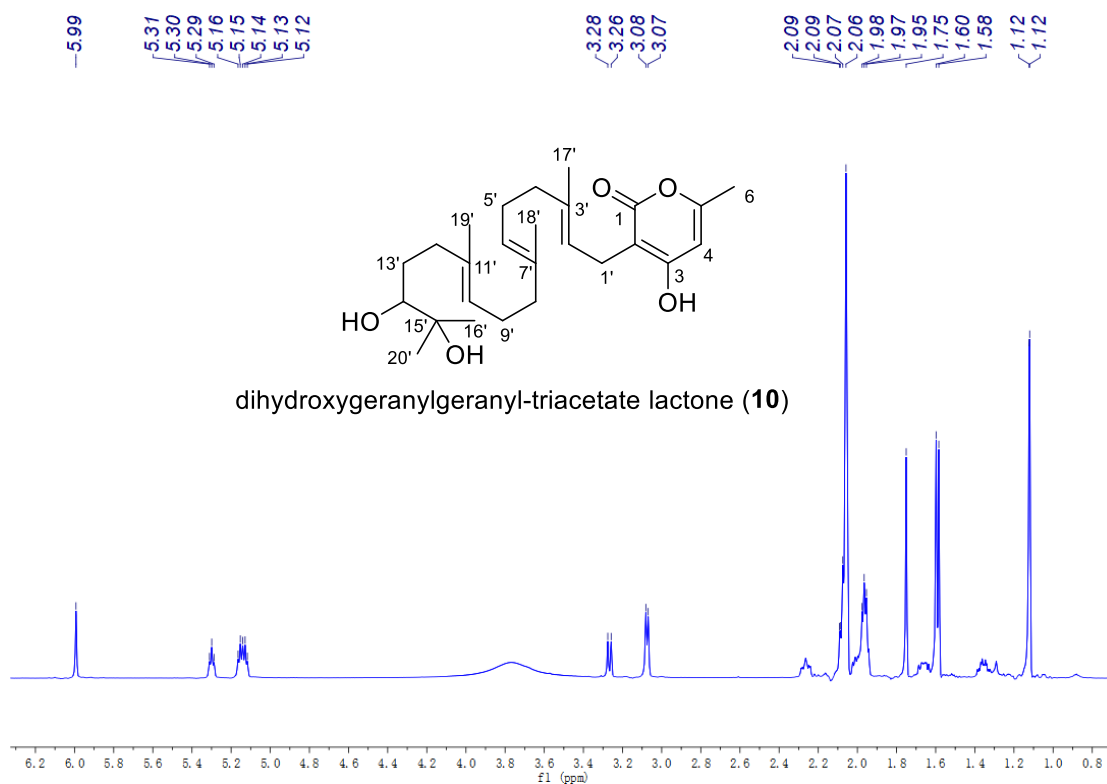

**Figure S56.**  $^1\text{H}$  NMR spectrum of dihydroxygeranylgeranyl-triacetate lactone (**10**)

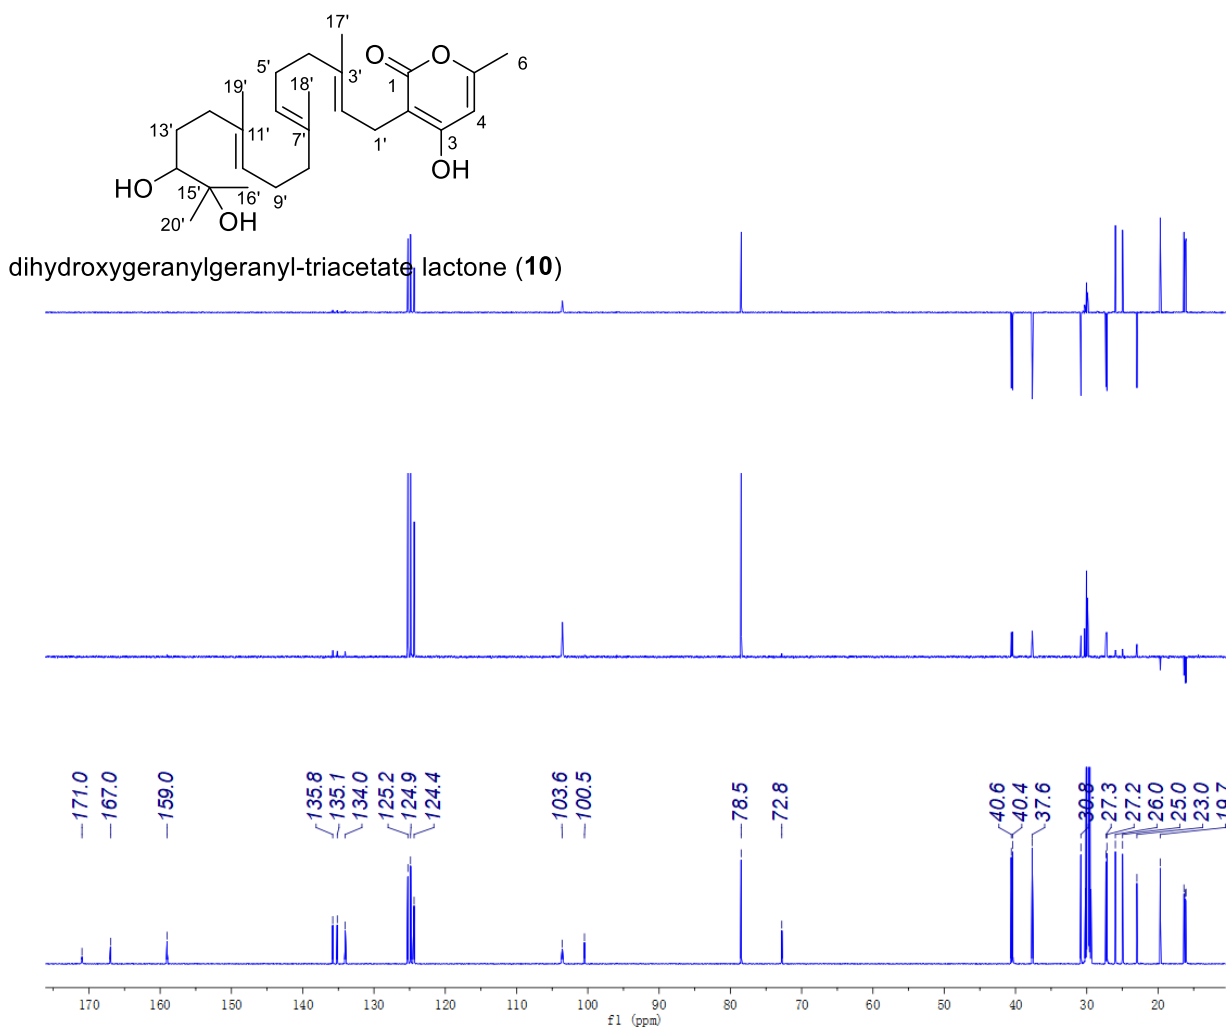

**Figure S57.**  $^{13}\text{C}$  NMR spectrum of dihydroxygeranylgeranyl-triacetate lactone (**10**)

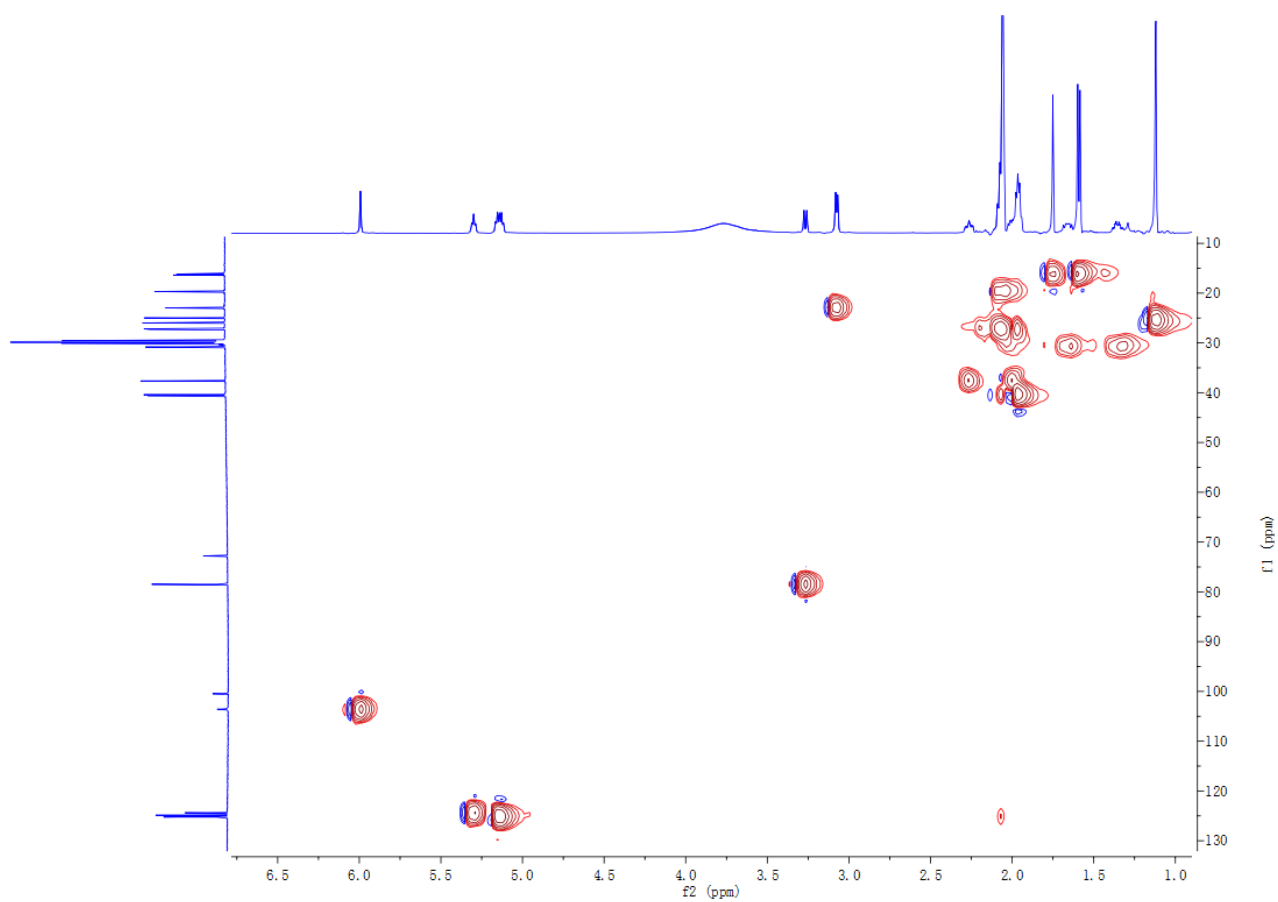

**Figure S58.** HSQC spectrum of dihydroxygeranylgeranyl-triacetate lactone (**10**)



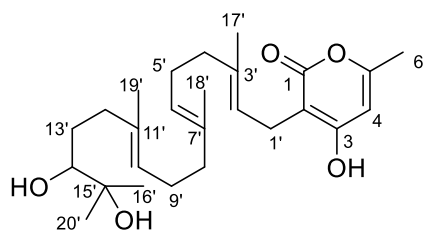

dihydroxygeranylgeranyl-triacetate lactone (**10**)

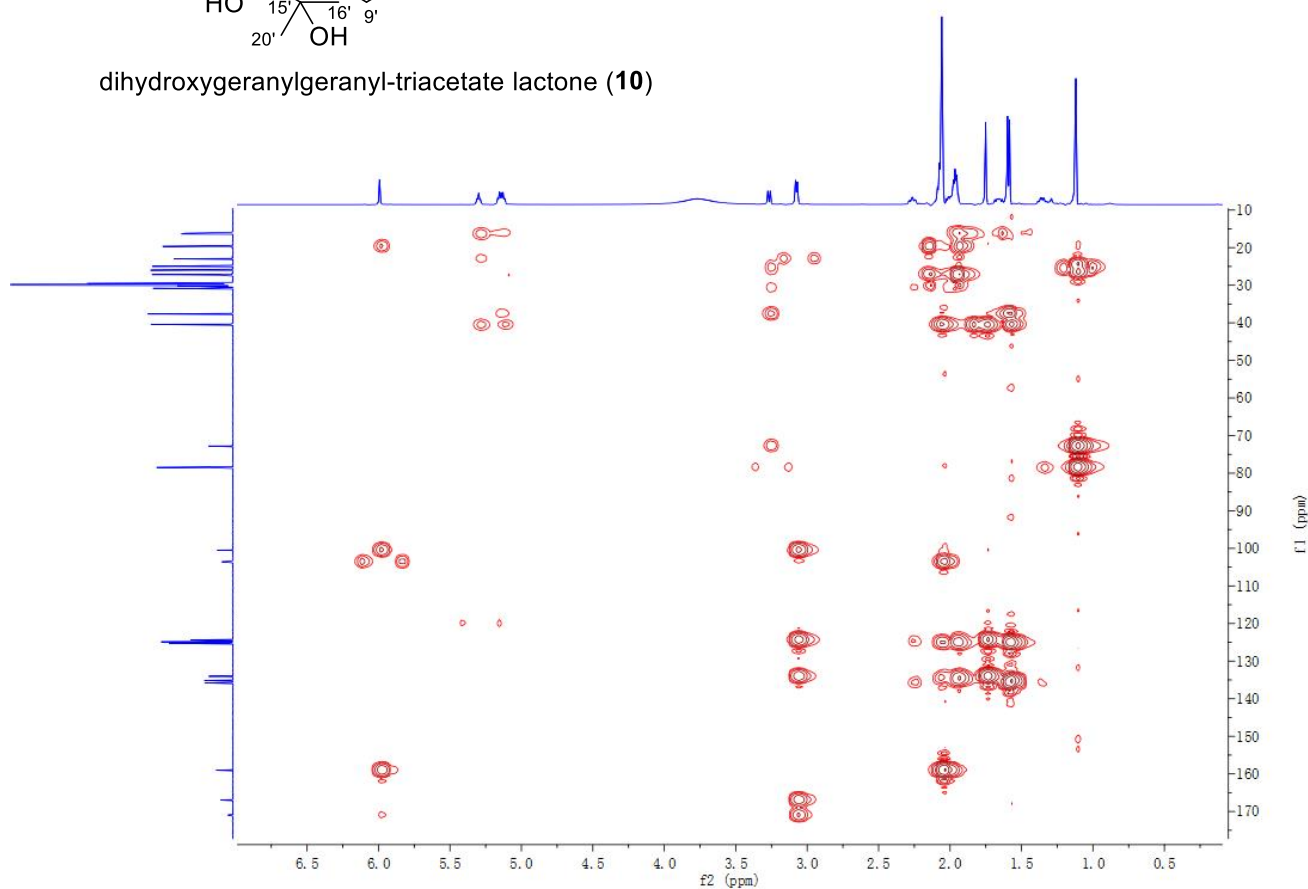

**Figure S59.** HMBC spectrum of dihydroxygeranylgeranyl-triacetate lactone (**10**)

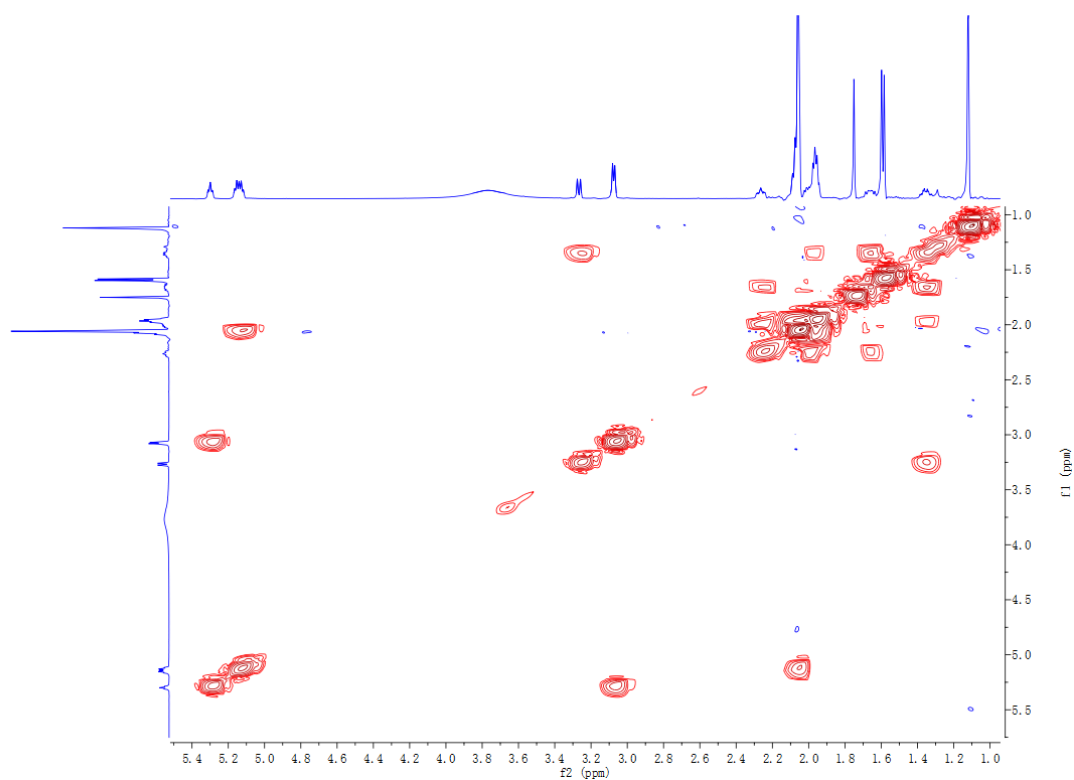

**Figure S60.**  $^1\text{H}$ - $^1\text{H}$  spectrum of dihydroxygeranylgeranyl-triacetate lactone (**10**)

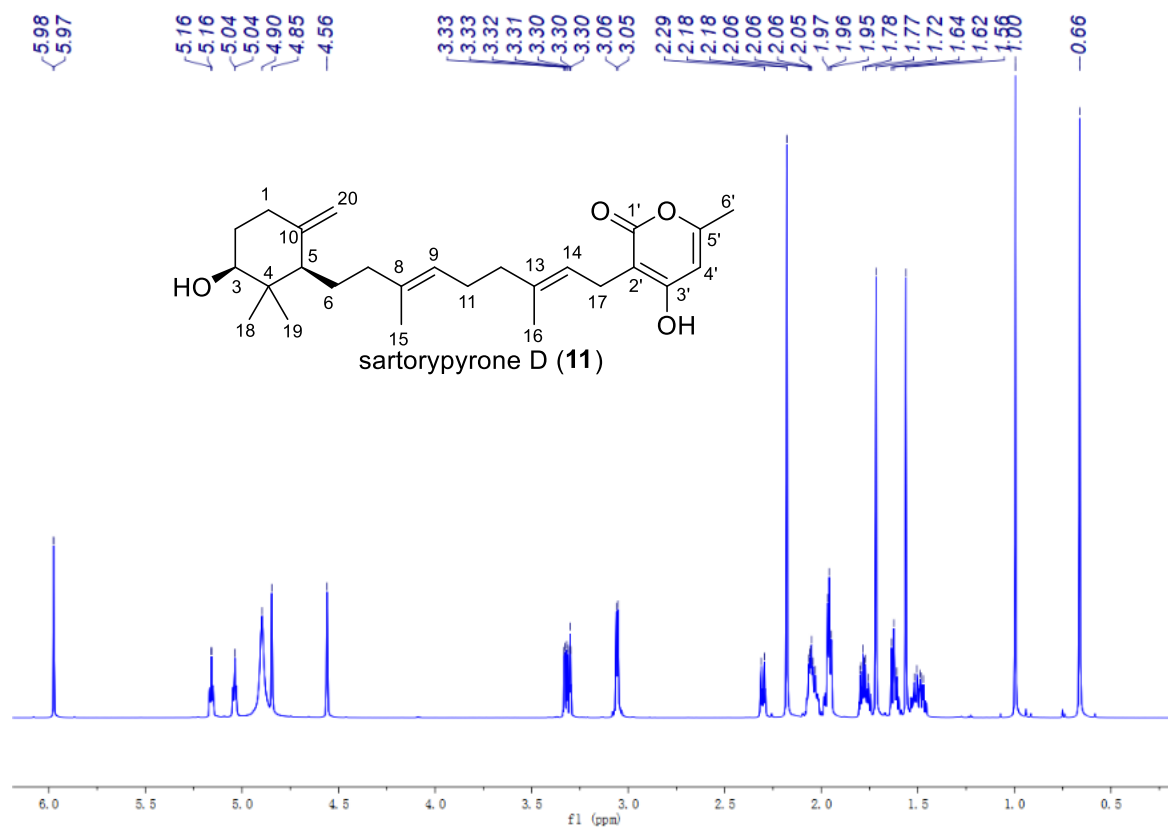

**Figure S61.** <sup>1</sup>H NMR spectrum of sartorypyrone D (11)

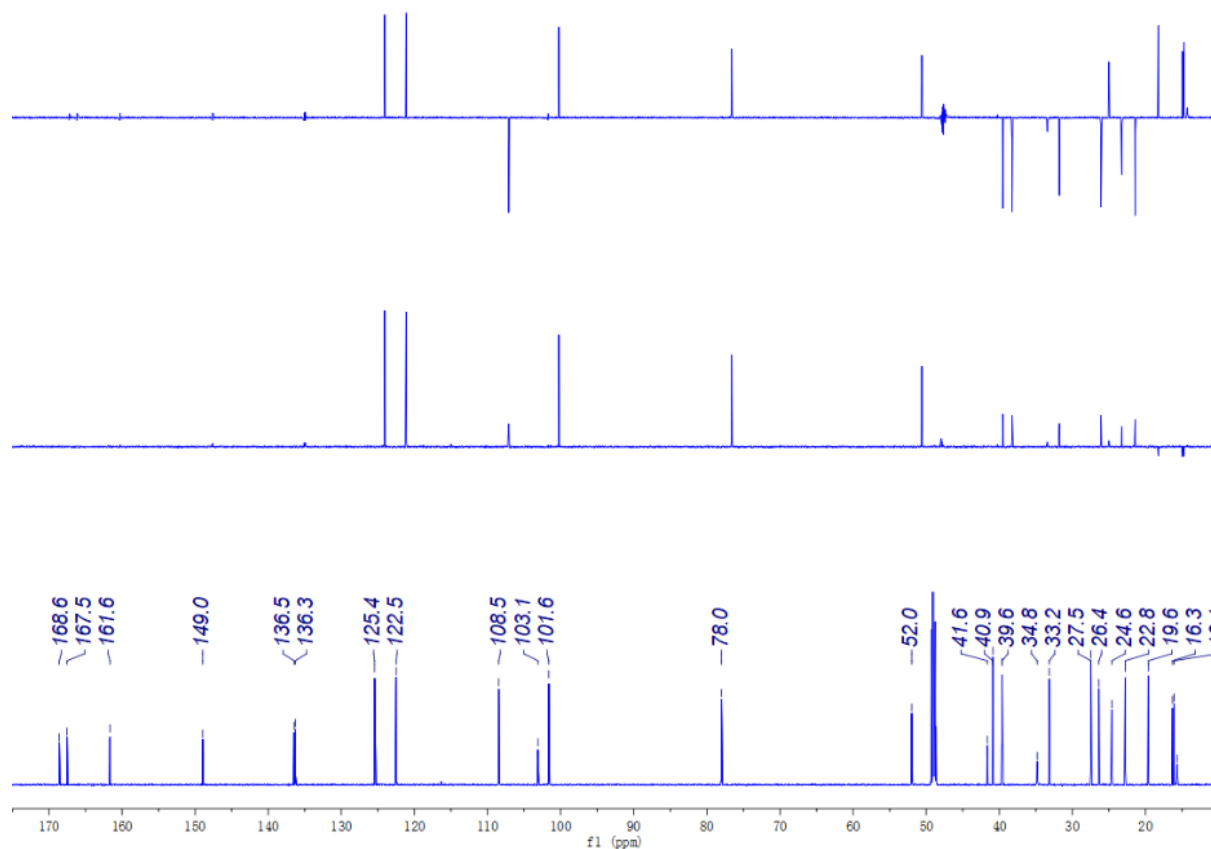

**Figure S62.** <sup>13</sup>C NMR spectrum of sartorypyrone D (11)
